# Supplementary material
Source: PubMed Central journal article supplement (PMC5918687)
Supplement: NIHMS944405-supplement.pdf [file NIHMS944405-supplement.pdf]

**Epithelium-derived Wnt ligands are essential for maintenance of underlying digit bone.**

**Authors:** Makoto Takeo<sup>1,2</sup>, Christopher S. Hale<sup>1</sup> and Mayumi Ito<sup>1,2,\*</sup>

**Affiliations:**

<sup>1</sup> The Ronald O. Perelman Department of Dermatology and <sup>2</sup>the Department of Cell Biology  
New York University, School of Medicine, New York, NY 10016, USA

\* Correspondence to: Mayumi Ito

522 First Ave. SML406

New York, NY 10016, USA

Tel: 1-212-263-9254

Fax: 1-212-263-5819

E-mail: [mayumi.ito@nyumc.org](mailto:mayumi.ito@nyumc.org)

## SUPPLEMENTARY FIGURES

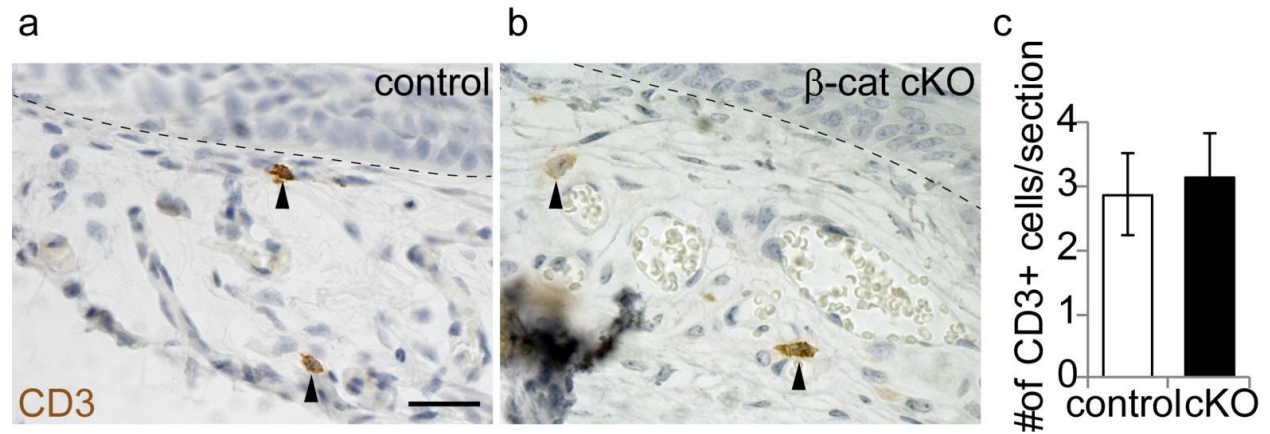

### Supplementary Figure 1. Wnt activated cells differentiate into osteoblast.

(a, b) Immunohistochemistry for CD3, a marker of mature T cell, on K14-CreER; $\beta$ -catenin cKO and control intact digit. Arrowheads indicate CD3 positive cells. (c) Quantification of CD3 positive cells. Dashed line indicates the border between nail epithelium and dermis. Data are presented as the mean  $\pm$  SD. Scale bar, 100  $\mu$ m.

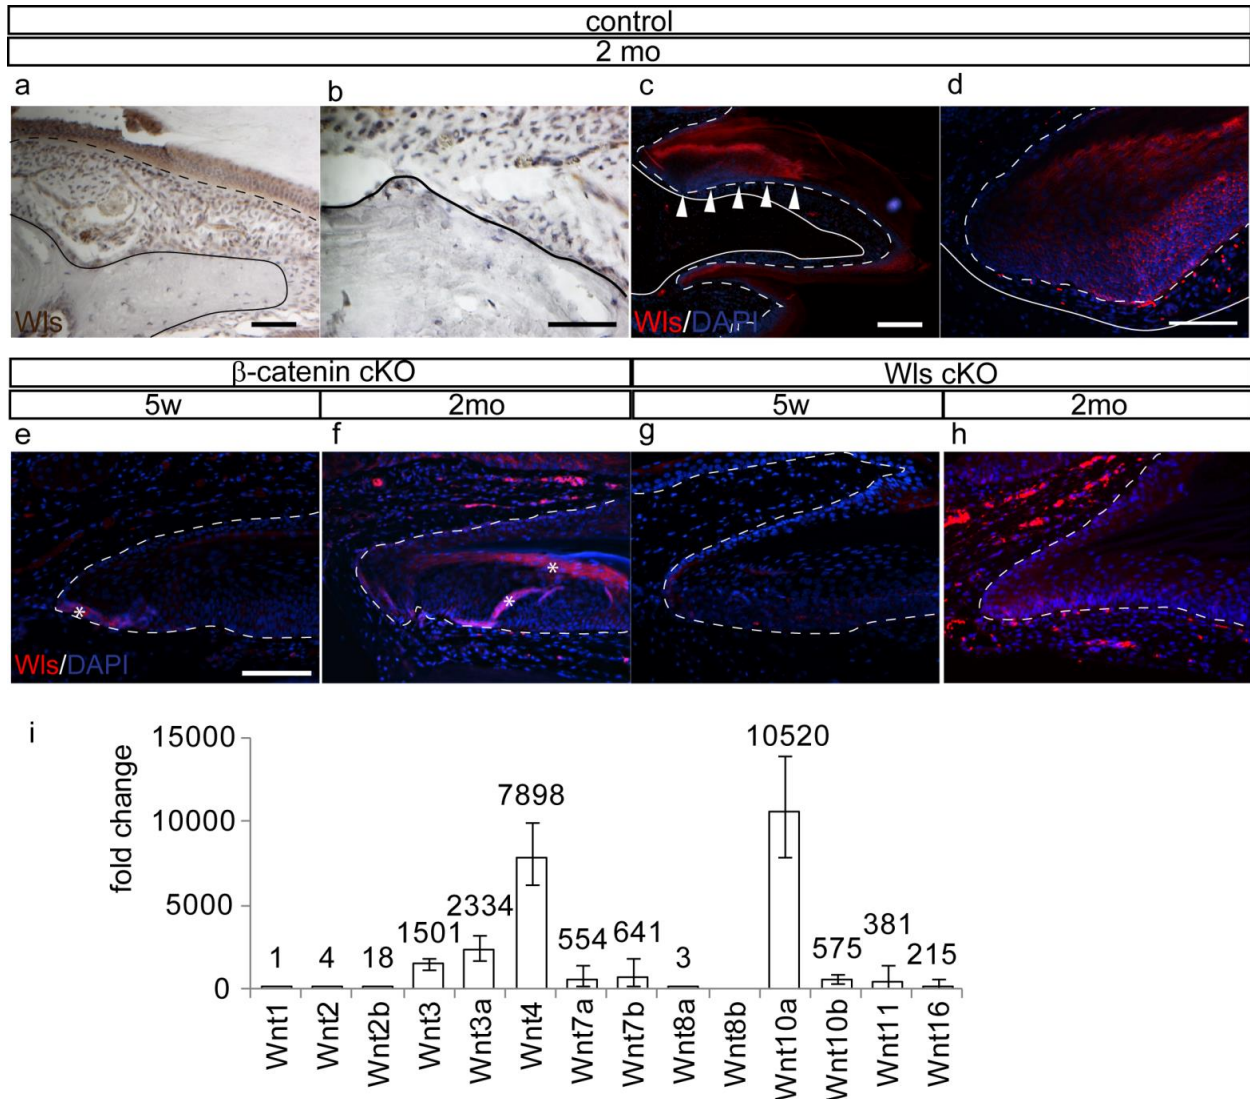

**Supplementary Figure. 2. Expression analysis of Wls and Wnt ligand.**

(a – h) Immunohistochemistry for Wls on control (a - d), β-catenin cKO (e and f) and Wls cKO mice (g and h) at 5 weeks (e and g) and 2 month (a-d, f and h) after tamoxifen treatment. (i) Gene expression analysis of Wnt ligands using isolated nail epithelium of 8-weeks old wild type mice. Arrowheads indicate Wls expressing area. Lines indicate border between terminal phalanx and dermis. Asterisks indicate nonspecific background. Dashed lines indicate border between epithelium and dermis. Data is presented as the mean ± SD (n=9). Scale bars, 100 μm in (a, d, and e-f); 50 μm in (b); 500 μm in (c).

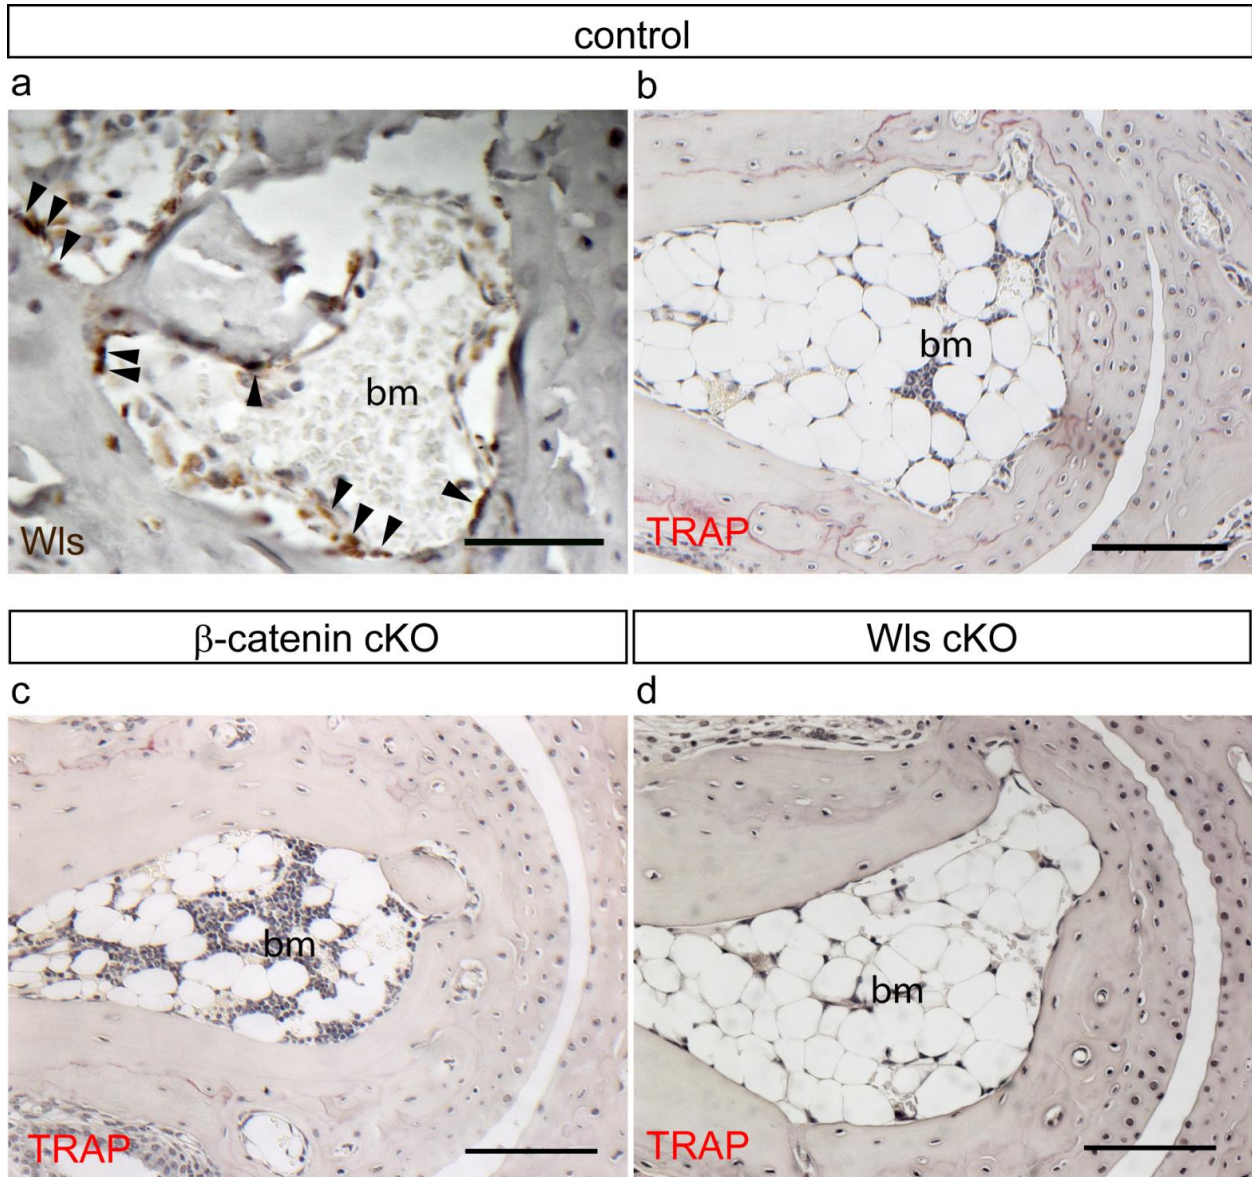

**Supplementary Figure 3 Loss of  $\beta$ -catenin or Wls in nail epithelium does not affect osteoclast activity in the middle phalanx.**

(a) Immunohistochemistry for Wls on middle phalanx of 8-week old wildtype digit. (b – d) TRAP staining on middle phalanx of control (b),  $\beta$ -catenin cKO (c), and Wls cKO (d) mice at 2 month after tamoxifen treatment starting from 3 weeks old. Arrowheads indicate Wls positive cells. bm, bone marrow. Scale bars, 50  $\mu$ m in (a); 100  $\mu$ m in (b - c).

## SUPPLEMENTALY TABLE

**Supplementaly teble 1. List of differentially regulated genes.**

| Transcripts Cluster Id | Fold change | Gene Symbol           | Gene description                                                                                                   |
|------------------------|-------------|-----------------------|--------------------------------------------------------------------------------------------------------------------|
| 10570621               | 69.11       | Defb3                 | defensin beta 3                                                                                                    |
| 10493879               | 50.55       | Sprr2i                | small proline-rich protein 2I                                                                                      |
| 10563597               | 48.02       | Saa3                  | serum amyloid A 3                                                                                                  |
| 10493867               | 46.79       | Sprr2e                | small proline-rich protein 2E                                                                                      |
| 10553274               | 42.04       | Saa2                  | serum amyloid A 2                                                                                                  |
| 10493831               | 33.15       | S100a8                | S100 calcium binding protein A8 (calgranulin A)                                                                    |
| 10499861               | 29.73       | S100a9                | S100 calcium binding protein A9 (calgranulin B)                                                                    |
| 10563611               | 28.12       | Saa1 Saa2             | serum amyloid A 1   serum amyloid A 2                                                                              |
| 10499948               | 26.16       | Lce3a                 | late cornified envelope 3A                                                                                         |
| 10522827               | 23.16       | Csn1s1                | casein alpha s1                                                                                                    |
| 10493870               | 22.49       | Sprr2f                | small proline-rich protein 2F                                                                                      |
| 10493873               | 19.95       | Sprr2g                | small proline-rich protein 2G                                                                                      |
| 10349968               | 17.96       | Chi3l1                | chitinase 3-like 1                                                                                                 |
| 10357077               | 17.30       | Serpib3d              | serine (or cysteine) peptidase inhibitor, clade B (ovalbumin), member 3D                                           |
| 10481627               | 17.09       | Lcn2                  | lipocalin 2                                                                                                        |
| 10593015               | 16.00       | Cd3g                  | CD3 antigen, gamma polypeptide                                                                                     |
| 10357090               | 14.35       | Serpib3c              | serine (or cysteine) peptidase inhibitor, clade B, member 3C                                                       |
| 10493896               | 13.46       | Lce3b                 | late cornified envelope 3B                                                                                         |
| 10493864               | 13.26       | Sprr2d                | small proline-rich protein 2D                                                                                      |
| 10389639               | 11.72       | Lpo                   | lactoperoxidase                                                                                                    |
| 10496825               | 11.22       | Uox                   | urate oxidase                                                                                                      |
| 10435504               | 10.66       | Gm5416                | predicted gene 5416                                                                                                |
| 10435497               | 10.51       | Stfa2l1               | stefin A2 like 1                                                                                                   |
| 10493882               | 10.49       | Sprr2j-ps             | small proline-rich protein 2J, pseudogene                                                                          |
| 10365926               | 10.41       | 4732465J04Rik         | RIKEN cDNA 4732465J04 gene                                                                                         |
| 10531009               | 10.13       | Tmprss11bnl           | transmembrane protease, serine 11b N terminal like                                                                 |
| 10523701               | 9.78        | Ibsp                  | integrin binding sialoprotein                                                                                      |
| 10570610               | 9.12        | Defb4                 | defensin beta 4                                                                                                    |
| 10407940               | 9.05        | Naip3 Tcrg-V2 Tcrg-V1 | NLR family, apoptosis inhibitory protein 3   T-cell receptor gamma, variable 2   T-cell receptor gamma, variable 1 |
| 10432886               | 8.40        | Krt4                  | keratin 4                                                                                                          |
| 10592044               | 8.14        | Tmem45b               | transmembrane protein 45b                                                                                          |
| 10604984               | 8.11        | Xlr4b Xlr4a Xlr4c     | X-linked lymphocyte-regulated 4B   X-linked lymphocyte-regulated 4A   X-linked lymphocyte-regulated 4C             |
| 10600131               | 8.11        | Xlr4b Xlr4c Xlr4a     | X-linked lymphocyte-regulated 4B   X-linked lymphocyte-regulated 4C   X-linked lymphocyte-regulated 4A             |
| 10605034               | 8.11        | Xlr4c Xlr4b Xlr4a     | X-linked lymphocyte-regulated 4C   X-linked lymphocyte-regulated 4B   X-linked lymphocyte-regulated 4A             |
| 10478633               | 8.06        | Mmp9                  | matrix metalloproteinase 9                                                                                         |
| 10489463               | 7.92        | Slpi                  | secretory leukocyte peptidase inhibitor                                                                            |
| 10351206               | 7.62        | Selp                  | selectin, platelet                                                                                                 |

| Transcripts<br>Cluster Id | Fold<br>change | Gene Symbol            | Gene description                                                                                   |
|---------------------------|----------------|------------------------|----------------------------------------------------------------------------------------------------|
| 10379727                  | 7.57           | Gm11428                | predicted gene 11428                                                                               |
| 10598976                  | 7.53           | Timp1                  | tissue inhibitor of metalloproteinase 1                                                            |
| 10403420                  | 7.44           | Idi2                   | isopentenyl-diphosphate delta isomerase 2                                                          |
| 10511779                  | 7.20           | Atp6v0d2               | ATPase, H+ transporting, lysosomal V0 subunit D2                                                   |
| 10530986                  | 6.96           | 9930032O22Rik          | RIKEN cDNA 9930032O22 gene                                                                         |
| 10466200                  | 6.77           | Ms4a7                  | membrane-spanning 4-domains, subfamily A, member 7                                                 |
| 10497381                  | 6.76           | Cyp7b1                 | cytochrome P450, family 7, subfamily b, polypeptide 1                                              |
| 10583044                  | 6.65           | Mmp13                  | matrix metalloproteinase 13                                                                        |
| 10439296                  | 6.58           | Stfa2                  | stefin A2                                                                                          |
| 10403821                  | 6.22           | Tcrg-V3 Tcrg-V2        | T-cell receptor gamma, variable 3   T-cell receptor gamma, variable 2                              |
| 10608138                  | 6.08           | Ddx3y                  | DEAD (Asp-Glu-Ala-Asp) box polypeptide 3, Y-linked                                                 |
| 10523120                  | 5.93           | Cxcl5                  | chemokine (C-X-C motif) ligand 5                                                                   |
| 10569011                  | 5.83           | Ifitm5                 | interferon induced transmembrane protein 5                                                         |
| 10523182                  | 5.67           | Areg                   | amphiregulin                                                                                       |
| 10452316                  | 5.66           | C3                     | complement component 3                                                                             |
| 10608001                  | 5.55           | Eif2s3y                | eukaryotic translation initiation factor 2, subunit 3, structural gene Y-linked                    |
| 10493905                  | 5.53           |                        |                                                                                                    |
| 10444016                  | 5.31           | Pram1                  | PML-RAR alpha-regulated adaptor molecule 1                                                         |
| 10397645                  | 5.20           | Gpr65                  | G-protein coupled receptor 65                                                                      |
| 10439292                  | 5.07           | BC100550 Sua1 BC117000 | cDNA sequence BC100550   Sema1 A1   cDNA sequence BC117000                                         |
| 10439289                  | 5.03           | BC117090               | cDNA sequence BC117090                                                                             |
| 10498345                  | 5.01           | Gpr171                 | G protein-coupled receptor 171                                                                     |
| 10399820                  | 4.98           | Acp1                   | acid phosphatase 1, soluble                                                                        |
| 10357072                  | 4.97           | Serpina3a              | serine (or cysteine) peptidase inhibitor, clade B (ovalbumin), member 3A                           |
| 10487597                  | 4.96           | Il1b                   | interleukin 1 beta                                                                                 |
| 10607972                  | 4.92           | Nu1050 LOC100040412    | lysine (K)-specific demethylase 5D   similar to jumonji, A1 rich interactive domain 1D (Pka2 like) |
| 10493903                  | 4.92           | Lce3c Lce3f Lce3b      | late cornified envelope 3C   late cornified envelope 3F   late cornified envelope 3B               |
| 10493907                  | 4.91           | Lce3f                  | late cornified envelope 3F                                                                         |
| 10588043                  | 4.82           | Rbp2                   | retinol binding protein 2, cellular                                                                |
| 10451953                  | 4.74           | Lrg1                   | leucine-rich alpha-2-glycoprotein 1                                                                |
| 10407537                  | 4.71           | Idi2                   | isopentenyl-diphosphate delta isomerase 2                                                          |
| 10608107                  | 4.68           | Uty                    | ubiquitously transcribed tetratricopeptide repeat gene, Y chromosome                               |
| 10494262                  | 4.68           | Ctsk                   | cathepsin K                                                                                        |
| 10402575                  | 4.58           | Degs2                  | degenerative spermatocyte homolog 2 (Drosophila), lipid desaturase                                 |
| 10552475                  | 4.56           | Klk12                  | kallikrein related-peptidase 12                                                                    |
| 10493886                  | 4.51           | Sprr2k                 | small proline-rich protein 2K                                                                      |
| 10493856                  | 4.42           | Sprr2a1 Sprr2a3        | small proline-rich protein 2A1   small proline-rich protein 2A3                                    |
| 10493858                  | 4.42           | Sprr2a1 Sprr2a3        | small proline-rich protein 2A1   small proline-rich protein 2A3                                    |
| 10435501                  | 4.35           | Stfa1                  | stefin A1                                                                                          |

| Transcripts<br>Cluster Id | Fold<br>change | Gene Symbol                                    | Gene description                                                                                                                                       |
|---------------------------|----------------|------------------------------------------------|--------------------------------------------------------------------------------------------------------------------------------------------------------|
| 10346448                  | 4.34           | Aox4                                           | aldehyde oxidase 4                                                                                                                                     |
| 10423836                  | 4.30           | Cthrc1                                         | collagen triple helix repeat containing 1                                                                                                              |
| 10523156                  | 4.27           | Cxcl2                                          | chemokine (C-X-C motif) ligand 2                                                                                                                       |
| 10606016                  | 4.22           | Il2rg                                          | interleukin 2 receptor, gamma chain                                                                                                                    |
| 10387257                  | 4.19           | Alox8                                          | arachidonate 8-lipoxygenase                                                                                                                            |
| 10495449                  | 4.16           | Col11a1                                        | collagen, type XI, alpha 1                                                                                                                             |
| 10414993                  | 4.10           | A630038E17Rik                                  | RIKEN cDNA A630038E17 gene                                                                                                                             |
| 10380419                  | 4.03           | Col1a1                                         | collagen, type I, alpha 1                                                                                                                              |
| 10368343                  | 3.98           | Arg1                                           | arginase, liver                                                                                                                                        |
| 10530960                  | 3.98           | Tmprss11d                                      | transmembrane protease, serine 11d                                                                                                                     |
| 10439936                  | 4.14           | Nfkbiz                                         | nuclear factor of kappa light polypeptide gene enhancer in B-cells inhibitor, zeta                                                                     |
| 10486425                  | 4.12           | Pla2g4d                                        | phospholipase A2, group IVD                                                                                                                            |
| 10530974                  | 3.95           | Tmprss11a                                      | transmembrane protease, serine 11a                                                                                                                     |
| 10560685                  | 3.95           | Bcl3                                           | B-cell leukemia/lymphoma 3                                                                                                                             |
| 10588037                  | 3.90           | Rbp1                                           | retinol binding protein 1, cellular                                                                                                                    |
| 10546240                  | 3.87           | Vmn1r49                                        | vomer nasal 1, receptor 49                                                                                                                             |
| 10346799                  | 3.85           | Icos                                           | inducible T-cell co-stimulator                                                                                                                         |
| 10540880                  | 3.83           | Syn2                                           | synapsin II                                                                                                                                            |
| 10525173                  | 3.79           | Oas1h                                          | 2'-5' oligoadenylate synthetase 1H                                                                                                                     |
| 10497349                  | 3.75           | Sirpb1a Sirpb1b LO<br>C100038947 LOC6<br>30976 | signal-regulatory protein beta 1A   signal-regulatory protein beta 1B<br>  signal-regulatory protein beta 1-like   similar to SIRP beta 1<br>isoform 3 |
| 10353415                  | 3.74           | Il17f                                          | interleukin 17F                                                                                                                                        |
| 10518300                  | 3.71           | Tnfrsf1b                                       | tumor necrosis factor receptor superfamily, member 1b                                                                                                  |
| 10462442                  | 3.67           | Il33                                           | interleukin 33                                                                                                                                         |
| 10402473                  | 3.65           | Clmn                                           | calmin                                                                                                                                                 |
| 10493979                  | 3.63           | Rptn                                           | repetin                                                                                                                                                |
| 10461721                  | 3.61           | Mpeg1                                          | macrophage expressed gene 1                                                                                                                            |
| 10549041                  | 3.55           | Slco1a5                                        | solute carrier organic anion transporter family, member 1a5                                                                                            |
| 10461614                  | 3.54           | Ms4a6c                                         | membrane-spanning 4-domains, subfamily A, member 6C                                                                                                    |
| 10486681                  | 3.53           | Tgm5                                           | transglutaminase 5                                                                                                                                     |
| 10587690                  | 3.52           | Bcl2a1b Bcl2a1d Bc<br>l2a1a                    | B-cell leukemia/lymphoma 2 related protein A1b   B-cell<br>leukemia/lymphoma 2 related protein A1d   B-cell<br>leukemia/lymphoma 2 related protein A1a |
| 10414590                  | 3.51           | Ear6 Ear7                                      | eosinophil-associated, ribonuclease A family, member 6   eosinophil-<br>associated, ribonuclease A family, member 7                                    |
| 10516266                  | 3.50           | Zc3h12a                                        | zinc finger CCCH type containing 12A                                                                                                                   |
| 10497364                  | 3.50           | Sirpb1b Sirpb1a LO<br>C100038947 LOC6<br>41195 | signal-regulatory protein beta 1B   signal-regulatory protein beta 1A<br>  signal-regulatory protein beta 1-like   similar to SIRP beta 1<br>isoform 1 |
| 10354309                  | 3.49           | Col5a2                                         | collagen, type V, alpha 2                                                                                                                              |
| 10428943                  | 3.48           | Gsdmc                                          | gasdermin C                                                                                                                                            |
| 10358547                  | 3.48           | Hmcn1                                          | hemicentin 1                                                                                                                                           |

| Transcripts Cluster Id | Fold change | Gene Symbol                     | Gene description                                                                                                                                                                                                                                                                             |
|------------------------|-------------|---------------------------------|----------------------------------------------------------------------------------------------------------------------------------------------------------------------------------------------------------------------------------------------------------------------------------------------|
| 10419154               | 3.46        | Ear1 Ear10 Ear2 Ear12 Ear3      | eosinophil-associated, ribonuclease A family, member 1   eosinophil-associated, ribonuclease A family, member 10   eosinophil-associated, ribonuclease A family, member 2   eosinophil-associated, ribonuclease A family, member 12   eosinophil-associated, ribonuclease A family, member 3 |
| 10357570               | 3.46        | Il19                            | interleukin 19                                                                                                                                                                                                                                                                               |
| 10372094               | 3.45        |                                 |                                                                                                                                                                                                                                                                                              |
| 10466521               | 3.43        | Gcnt1                           | glucosaminyl (N-acetyl) transferase 1, core 2                                                                                                                                                                                                                                                |
| 10357472               | 3.42        | Cxcr4                           | chemokine (C-X-C motif) receptor 4                                                                                                                                                                                                                                                           |
| 10351182               | 3.42        | Sele                            | selectin, endothelial cell                                                                                                                                                                                                                                                                   |
| 10574139               | 3.42        | Nlrc5                           | NLR family, CARD domain containing 5                                                                                                                                                                                                                                                         |
| 10403996               | 3.41        | Vmn1r200                        | vomer nasal 1 receptor 200                                                                                                                                                                                                                                                                   |
| 10530145               | 3.41        | Tlr1                            | toll-like receptor 1                                                                                                                                                                                                                                                                         |
| 10598175               | 3.37        | Ear10 Ear2 Ear12 Ear3           | eosinophil-associated, ribonuclease A family, member 10   eosinophil-associated, ribonuclease A family, member 2   eosinophil-associated, ribonuclease A family, member 1   eosinophil-associated, ribonuclease A family, member 12   eosinophil-associated, ribonuclease A family, member 3 |
| 10568668               | 3.36        | Adam12                          | a disintegrin and metallopeptidase domain 12 (meltrin alpha)                                                                                                                                                                                                                                 |
| 10385323               | 3.35        | Mir146                          | microRNA 146                                                                                                                                                                                                                                                                                 |
| 10419156               | 3.33        | Ear10 Ear2 Ear12 Ear3           | eosinophil-associated, ribonuclease A family, member 10   eosinophil-associated, ribonuclease A family, member 2   eosinophil-associated, ribonuclease A family, member 1   eosinophil-associated, ribonuclease A family, member 12   eosinophil-associated, ribonuclease A family, member 3 |
| 10358879               | 3.30        | Npl                             | N-acetylneuraminase pyruvate lyase                                                                                                                                                                                                                                                           |
| 10462313               | 3.29        | Slc1a1                          | solute carrier family 1 (neuronal/epithelial high affinity glutamate transporter, system Xag), member 1                                                                                                                                                                                      |
| 10536220               | 3.28        | Col1a2                          | collagen, type I, alpha 2                                                                                                                                                                                                                                                                    |
| 10595633               | 3.27        | Bcl2a1d Bcl2a1a Bcl2a1b Bcl2a1c | B-cell leukemia/lymphoma 2 related protein A1d   B-cell leukemia/lymphoma 2 related protein A1a   B-cell leukemia/lymphoma 2 related protein A1b   B-cell leukemia/lymphoma 2 related protein A1c                                                                                            |
| 10587683               | 3.27        | Bcl2a1a Bcl2a1d Bcl2a1b Bcl2a1c | B-cell leukemia/lymphoma 2 related protein A1a   B-cell leukemia/lymphoma 2 related protein A1d   B-cell leukemia/lymphoma 2 related protein A1b   B-cell leukemia/lymphoma 2 related protein A1c                                                                                            |
| 10367400               | 3.24        | Mmp19                           | matrix metallopeptidase 19                                                                                                                                                                                                                                                                   |
| 10493834               | 3.23        | Pglyrp4                         | peptidoglycan recognition protein 4                                                                                                                                                                                                                                                          |
| 10358565               | 3.23        | Hmcn1                           | hemicentin 1                                                                                                                                                                                                                                                                                 |
| 10571467               | 3.23        | Pdgfrl Gm9868                   | platelet-derived growth factor receptor-like   predicted gene 9868                                                                                                                                                                                                                           |
| 10476301               | 3.22        | Smox                            | spermine oxidase                                                                                                                                                                                                                                                                             |
| 10541614               | 3.21        | Clec4d                          | C-type lectin domain family 4, member d                                                                                                                                                                                                                                                      |
| 10581605               | 3.21        | Hp                              | haptoglobin                                                                                                                                                                                                                                                                                  |



| Transcripts Cluster Id | Fold change | Gene Symbol   | Gene description                                                                                                                |
|------------------------|-------------|---------------|---------------------------------------------------------------------------------------------------------------------------------|
| 10515986               | 3.19        | Zfp69         | zinc finger protein 69                                                                                                          |
| 10497258               | 3.19        | Fabp9         | fatty acid binding protein 9, testis                                                                                            |
| 10469793               | 3.19        | Il1f6         | interleukin 1 family, member 6                                                                                                  |
| 10587792               | 3.16        | Plscr1        | phospholipid scramblase 1                                                                                                       |
| 10374083               | 3.16        | Aebp1         | AE binding protein 1                                                                                                            |
| 10541605               | 3.15        | Clec4n        | C-type lectin domain family 4, member n                                                                                         |
| 10598013               | 3.15        | Ccr5 Ccr2     | chemokine (C-C motif) receptor 5   chemokine (C-C motif) receptor 2                                                             |
| 10478525               | 3.15        | Wfdc2         | WAP four-disulfide core domain 2                                                                                                |
| 10590635               | 3.15        | Ccr5 Ccr2     | chemokine (C-C motif) receptor 5   chemokine (C-C motif) receptor 2                                                             |
| 10426467               | 3.15        | Tmem117       | transmembrane protein 117                                                                                                       |
| 10584821               | 3.13        | Cd3d          | CD3 antigen, delta polypeptide                                                                                                  |
| 10442381               | 3.12        | Prss27        | protease, serine, 27                                                                                                            |
| 10587616               | 3.11        | Prss35        | protease, serine, 35                                                                                                            |
| 10416437               | 3.10        | Lcp1          | lymphocyte cytosolic protein 1                                                                                                  |
| 10419034               | 3.09        | 2610528A11Rik | RIKEN cDNA 2610528A11 gene                                                                                                      |
| 10590631               | 3.09        | Ccr2          | chemokine (C-C motif) receptor 2                                                                                                |
| 10449452               | 3.06        | Fkbp5         | FK506 binding protein 5                                                                                                         |
| 10591123               | 3.05        | Fat3          | FAT tumor suppressor homolog 3 (Drosophila)                                                                                     |
| 10490923               | 3.05        | Car2          | carbonic anhydrase 2                                                                                                            |
| 10466210               | 3.05        | Ms4a6d        | membrane-spanning 4-domains, subfamily A, member 6D                                                                             |
| 10358529               | 3.05        | Hmcn1         | hemicentin 1                                                                                                                    |
| 10607499               | 3.04        | Phex          | phosphate regulating gene with homologies to endopeptidases on the X chromosome (hypophosphatemia, vitamin D resistant rickets) |
| 10403816               | 3.04        |               |                                                                                                                                 |
| 10578322               | 3.04        | Pdgfrl Gm9868 | platelet-derived growth factor receptor-like   predicted gene 9868                                                              |
| 10459071               | 3.03        | 2010002N04Rik | RIKEN cDNA 2010002N04 gene                                                                                                      |
| 10473312               | 3.03        | Fam171b       | family with sequence similarity 171, member B                                                                                   |
| 10434698               | 3.02        | Fetub         | fetuin beta                                                                                                                     |
| 10552516               | 3.02        | Klk6          | kallikrein related-peptidase 6                                                                                                  |
| 10439299               | 3.00        | Stfa3         | stefin A3                                                                                                                       |
| 10438822               | 2.99        | Atp13a5       | ATPase type 13A5                                                                                                                |
| 10548326               | 2.99        | Clec2e        | C-type lectin domain family 2, member e                                                                                         |
| 10574163               | 2.98        | Nlrc5         | NLR family, CARD domain containing 5                                                                                            |
| 10396148               | 2.98        | Abhd12b       | abhydrolase domain containing 12B                                                                                               |
| 10433003               | 2.98        | Sp7           |                                                                                                                                 |
| 10440120               | 2.97        | Gm813         | predicted gene 813                                                                                                              |
| 10358527               | 2.97        | Hmcn1         | hemicentin 1                                                                                                                    |
| 10576216               | 2.96        | Snord68 Rpl13 | small nucleolar RNA, C/D box 68   ribosomal protein L13                                                                         |
| 10349129               | 2.95        | Serpinb13     | serine (or cysteine) peptidase inhibitor, clade B (ovalbumin), member 13                                                        |
| 10440643               | 2.95        | Cldn17        | claudin 17                                                                                                                      |

| Transcripts Cluster Id | Fold change | Gene Symbol   | Gene description                                                                                  |
|------------------------|-------------|---------------|---------------------------------------------------------------------------------------------------|
| 10389590               | 2.92        | Gdpd1         | glycerophosphodiester phosphodiesterase domain containing 1                                       |
| 10588582               | 2.91        | 6430571L13Rik | RIKEN cDNA 6430571L13 gene                                                                        |
| 10345791               | 2.89        | Il1rl1        | interleukin 1 receptor-like 1                                                                     |
| 10434689               | 2.88        | Ahsg          | alpha-2-HS-glycoprotein                                                                           |
| 10570606               | 2.86        | Defb14        | defensin beta 14                                                                                  |
| 10592266               | 2.85        | Slc37a2       | solute carrier family 37 (glycerol-3-phosphate transporter), member 2                             |
| 10521038               | 2.85        | Slc5a1        | solute carrier family 5 (sodium/glucose cotransporter), member 1                                  |
| 10395103               | 2.83        | Pxdn          | peroxidasin homolog (Drosophila)                                                                  |
| 10539244               | 2.81        | Tacr1         | tachykinin receptor 1                                                                             |
| 10358635               | 2.80        | Hmcn1         | hemicentin 1                                                                                      |
| 10455901               | 2.80        | Slc27a6       | solute carrier family 27 (fatty acid transporter), member 6                                       |
| 10473444               | 2.79        | Aplnr         | apelin receptor                                                                                   |
| 10548665               | 2.77        | Tas2r115      | taste receptor, type 2, member 115                                                                |
| 10358224               | 2.76        | Ptprc         | protein tyrosine phosphatase, receptor type, C                                                    |
| 10429534               | 2.76        | Gml           | GPI anchored molecule like protein                                                                |
| 10547030               | 2.76        | 2510049J12Rik | RIKEN cDNA 2510049J12 gene                                                                        |
| 10402422               | 2.76        | Serpina9      | serine (or cysteine) peptidase inhibitor, clade A (alpha-1 antiproteinase, antitrypsin), member 9 |
| 10370210               | 2.75        | Col6a1        | collagen, type VI, alpha 1                                                                        |
| 10356520               | 2.75        | Col6a3        | collagen, type VI, alpha 3                                                                        |
| 10390640               | 2.74        | Ikzf3         | IKAROS family zinc finger 3                                                                       |
| 10585381               | 2.71        | Slc35f2       | solute carrier family 35, member F2                                                               |
| 10474361               | 2.70        | Mpped2        | metallophosphoesterase domain containing 2                                                        |
| 10379731               | 2.70        | Expi          | extracellular proteinase inhibitor                                                                |
| 10589958               | 2.70        | Gm9487        | glyceraldehyde-3-phosphate dehydrogenase pseudogene                                               |
| 10544885               | 2.67        | Fkbp14        | FK506 binding protein 14                                                                          |
| 10461622               | 2.66        | Ms4a6b        | membrane-spanning 4-domains, subfamily A, member 6B                                               |
| 10517587               | 2.66        | Alpl          | alkaline phosphatase, liver/bone/kidney                                                           |
| 10346015               | 2.65        | Col3a1        | collagen, type III, alpha 1                                                                       |
| 10485445               | 2.64        | Ehf           | ets homologous factor                                                                             |
| 10493900               | 2.64        | Lce3c         | late cornified envelope 3C                                                                        |
| 10414551               | 2.64        | Ear5          | eosinophil-associated, ribonuclease A family, member 5                                            |
| 10408557               | 2.63        | Serpina1a     | serine (or cysteine) peptidase inhibitor, clade B, member 1a                                      |
| 10508663               | 2.63        | Laptn5        | lysosomal-associated protein transmembrane 5                                                      |
| 10385995               | 2.62        | Ccdc69        | coiled-coil domain containing 69                                                                  |
| 10358619               | 2.62        | Hmcn1         | hemicentin 1                                                                                      |
| 10486403               | 2.62        | Pla2g4e       | phospholipase A2, group IVE                                                                       |
| 10358670               | 2.61        | Hmcn1         | hemicentin 1                                                                                      |
| 10391061               | 2.59        | Krt16         | keratin 16                                                                                        |
| 10400304               | 2.59        | Egn3          | EGL nine homolog 3 (C. elegans)                                                                   |
| 10420724               | 2.58        | Defb30        | defensin beta 30                                                                                  |
| 10489391               | 2.57        | Ada           | adenosine deaminase                                                                               |

| Transcripts Cluster Id | Fold change | Gene Symbol                      | Gene description                                                                                              |
|------------------------|-------------|----------------------------------|---------------------------------------------------------------------------------------------------------------|
| 10388160               | 2.56        | Slc13a5                          | solute carrier family 13 (sodium-dependent citrate transporter), member 5                                     |
| 10428376               | 2.56        | Angpt1                           | angiopoietin 1                                                                                                |
| 10472538               | 2.56        | Dhrs9                            | dehydrogenase/reductase (SDR family) member 9                                                                 |
| 10446656               | 2.56        | Lpin2                            | lipin 2                                                                                                       |
| 10570754               | 2.55        | Defb35                           | defensin beta 35                                                                                              |
| 10590623               | 2.55        | Cxcr6                            | chemokine (C-X-C motif) receptor 6                                                                            |
| 10583071               | 2.55        | Mmp3                             | matrix metalloproteinase 3                                                                                    |
| 10570955               | 2.54        | Golga7 4930518F22<br>Rik         | golgi autoantigen, golgin subfamily a, 7   RIKEN cDNA 4930518F22 gene                                         |
| 10539967               | 2.54        | Vmn1r50                          | vomer nasal 1 receptor 50                                                                                     |
| 10432756               | 2.53        | Gm5414 Gm5476                    | predicted gene 5414   type II keratin Kb17P pseudogene                                                        |
| 10358668               | 2.53        | Hmcn1                            | hemicentin 1                                                                                                  |
| 10391504               | 2.53        | Meox1                            | mesenchyme homeobox 1                                                                                         |
| 10462539               | 2.51        | Nudt15                           | nudix (nucleoside diphosphate linked moiety X)-type motif 15                                                  |
| 10472195               | 2.51        | Nudt15                           | nudix (nucleoside diphosphate linked moiety X)-type motif 15                                                  |
| 10452815               | 2.50        | Xdh                              | xanthine dehydrogenase                                                                                        |
| 10432767               | 2.50        | Gm5478                           | predicted pseudogene 5478                                                                                     |
| 10374529               | 2.50        | AV249152                         |                                                                                                               |
| 10514185               | 2.49        |                                  |                                                                                                               |
| 10427628               | 2.49        | Il7r                             | interleukin 7 receptor                                                                                        |
| 10577190               | 2.48        | Rasa3                            | RAS p21 protein activator 3                                                                                   |
| 10346150               | 2.48        | Tmeff2                           | transmembrane protein with EGF-like and two follistatin-like domains 2                                        |
| 10369479               | 2.48        | Lrrc20 D830039M1<br>4Rik         | leucine rich repeat containing 20   RIKEN cDNA D830039M14 gene                                                |
| 10432774               | 2.47        | Krt6b                            | keratin 6B                                                                                                    |
| 10358662               | 2.47        | Hmcn1                            | hemicentin 1                                                                                                  |
| 10605571               | 2.47        | Gyk                              | glycerol kinase                                                                                               |
| 10475517               | 2.46        | AA467197 Mir147                  | expressed sequence AA467197   microRNA 147                                                                    |
| 10457686               | 2.45        | Dsc2                             | desmocollin 2                                                                                                 |
| 10442493               | 2.45        |                                  |                                                                                                               |
| 10511803               | 2.45        | 2610029I01Rik                    | RIKEN cDNA 2610029I01 gene                                                                                    |
| 10584841               | 2.44        | Amica1                           | adhesion molecule, interacts with CXADR antigen 1                                                             |
| 10578448               | 2.44        | Cyp4v3 Klkb1                     | cytochrome P450, family 4, subfamily v, polypeptide 3   kallikrein B, plasma 1                                |
| 10547657               | 2.43        | C3ar1                            | complement component 3a receptor 1                                                                            |
| 10350516               | 2.42        | Ptgs2                            | prostaglandin-endoperoxide synthase 2                                                                         |
| 10468988               | 2.41        |                                  |                                                                                                               |
| 10430344               | 2.41        | Il2rb                            | interleukin 2 receptor, beta chain                                                                            |
| 10372648               | 2.40        | Lyz2                             | lysozyme 2                                                                                                    |
| 10497356               | 2.40        | Sirpb1a Sirpb1b LO<br>C100038947 | signal-regulatory protein beta 1A   signal-regulatory protein beta 1B   signal-regulatory protein beta 1-like |
| 10466190               | 2.40        | Ms4a14                           | membrane-spanning 4-domains, subfamily A, member 14                                                           |
| 10582997               | 2.40        | Casp4                            | caspase 4, apoptosis-related cysteine peptidase                                                               |

| Transcripts Cluster Id | Fold change | Gene Symbol              | Gene description                                                                                 |
|------------------------|-------------|--------------------------|--------------------------------------------------------------------------------------------------|
| 10461856               | 2.40        | Gna14                    | guanine nucleotide binding protein, alpha 14                                                     |
| 10425287               | 2.40        | Kdelr3                   | KDEL (Lys-Asp-Glu-Leu) endoplasmic reticulum protein retention receptor 3                        |
| 10510687               | 2.39        | Acot7                    | acyl-CoA thioesterase 7                                                                          |
| 10391444               | 2.39        | Rundc1 1700113I22<br>Rik | RUN domain containing 1   RIKEN cDNA 1700113I22 gene                                             |
| 10407276               | 2.38        | Mir449a                  | microRNA 449a                                                                                    |
| 10398075               | 2.38        | Serpina3n                | serine (or cysteine) peptidase inhibitor, clade A, member 3N                                     |
| 10552469               | 2.38        | Klk13                    | kallikrein related-peptidase 13                                                                  |
| 10423109               | 2.37        | Adamts12                 | a disintegrin-like and metallopeptidase (repolysin type) with thrombospondin type 1 motif, 12    |
| 10591120               | 2.37        | Fat3                     | FAT tumor suppressor homolog 3 (Drosophila)                                                      |
| 10543239               | 2.36        | Tefec                    | transcription factor EC                                                                          |
| 10489434               | 2.36        | Wfdc12                   | WAP four-disulfide core domain 12                                                                |
| 10448409               | 2.36        | Prss22                   | protease, serine, 22                                                                             |
| 10398665               | 2.36        | Tnfaip2                  | tumor necrosis factor, alpha-induced protein 2                                                   |
| 10554789               | 2.35        | Ctsc                     | cathepsin C                                                                                      |
| 10490989               | 2.35        | Cp                       | ceruloplasmin                                                                                    |
| 10423080               | 2.35        | C1qtnf3                  | C1q and tumor necrosis factor related protein 3                                                  |
| 10358664               | 2.35        | Hmcn1                    | hemicentin 1                                                                                     |
| 10583920               | 2.35        | Eepd1                    | endonuclease/exonuclease/phosphatase family domain containing 1                                  |
| 10495854               | 2.35        | Prss12                   | protease, serine, 12 neurotrypsin (motopsin)                                                     |
| 10432243               | 2.34        | Fkbp11                   | FK506 binding protein 11                                                                         |
| 10374333               | 2.34        | Ikzf1                    | IKAROS family zinc finger 1                                                                      |
| 10363082               | 2.34        | Lilrb4                   | leukocyte immunoglobulin-like receptor, subfamily B, member 4                                    |
| 10358571               | 2.34        | Hmcn1                    | hemicentin 1                                                                                     |
| 10370180               | 2.33        | Col6a2                   | collagen, type VI, alpha 2                                                                       |
| 10555323               | 2.32        | P4ha3                    | procollagen-proline, 2-oxoglutarate 4-dioxygenase (proline 4-hydroxylase), alpha polypeptide III |
| 10596454               | 2.31        | Alas1                    | aminolevulinic acid synthase 1                                                                   |
| 10357084               | 2.31        | Serpina3b                | serine (or cysteine) peptidase inhibitor, clade B (ovalbumin), member 3B                         |
| 10545135               | 2.31        | Il12rb2                  | interleukin 12 receptor, beta 2                                                                  |
| 10497265               | 2.30        | Fabp4                    | fatty acid binding protein 4, adipocyte                                                          |
| 10457644               | 2.30        | Cdh2                     | cadherin 2                                                                                       |
| 10565958               | 2.30        | P2ry6                    | pyrimidinergic receptor P2Y, G-protein coupled, 6                                                |
| 10514544               | 2.30        | Gm12695                  | predicted gene 12695                                                                             |
| 10423291               | 2.30        | Gm5468                   | predicted gene 5468                                                                              |
| 10540085               | 2.30        | Fbln2                    | fibulin 2                                                                                        |
| 10579649               | 2.29        | Cib3                     | calcium and integrin binding family member 3                                                     |
| 10379511               | 2.29        | Ccl2                     | chemokine (C-C motif) ligand 2                                                                   |
| 10358581               | 2.28        | Hmcn1                    | hemicentin 1                                                                                     |
| 10595211               | 2.28        | Col12a1                  | collagen, type XII, alpha 1                                                                      |

| Transcripts Cluster Id | Fold change | Gene Symbol    | Gene description                                                                   |
|------------------------|-------------|----------------|------------------------------------------------------------------------------------|
| 10352448               | 2.28        | Dusp10         | dual specificity phosphatase 10                                                    |
| 10458894               | 2.28        | Lox            | lysyl oxidase                                                                      |
| 10347734               | 2.27        | Sgpp2          | sphingosine-1-phosphate phosphatase 2                                              |
| 10404895               | 2.27        | 5033430I15Rik  | RIKEN cDNA 5033430I15 gene                                                         |
| 10358656               | 2.27        | Hmcn1          | hemicentin 1                                                                       |
| 10403743               | 2.27        | Inhba          | inhibin beta-A                                                                     |
| 10483081               | 2.27        | Fap            | fibroblast activation protein                                                      |
| 10560242               | 2.27        | C5ar1          | complement component 5a receptor 1                                                 |
| 10493842               | 2.27        | Pglyrp3        | peptidoglycan recognition protein 3                                                |
| 10497481               | 2.27        | 2810416G20Rik  | RIKEN cDNA 2810416G20 gene                                                         |
| 10417212               | 2.27        | Itgb1          | integrin, beta-like 1                                                              |
| 10364262               | 2.26        | Itgb2          | integrin beta 2                                                                    |
| 10551883               | 2.26        | Tyrobp         | TYRO protein tyrosine kinase binding protein                                       |
| 10358551               | 2.26        | Hmcn1          | hemicentin 1                                                                       |
| 10455123               | 2.25        | Pcdhb19        | protocadherin beta 19                                                              |
| 10358593               | 2.25        | Hmcn1          | hemicentin 1                                                                       |
| 10531737               | 2.25        | Hpse           | heparanase                                                                         |
| 10414262               | 2.25        | Ear2           | eosinophil-associated, ribonuclease A family, member 2                             |
| 10349671               | 2.25        | Slc26a9        | solute carrier family 26, member 9                                                 |
| 10421361               | 2.24        | Bmp1           | bone morphogenetic protein 1                                                       |
| 10356020               | 2.24        | Dock10         | dedicator of cytokinesis 10                                                        |
| 10507612               | 2.24        | Lepre1         | leprecan 1                                                                         |
| 10395273               | 2.23        | Gdap10         | ganglioside-induced differentiation-associated-protein 10                          |
| 10538150               | 2.23        | Tmem176a       | transmembrane protein 176A                                                         |
| 10514338               | 2.23        | Mir31          | microRNA 31                                                                        |
| 10381122               | 2.23        | Fkbp10 Nt5c31  | FK506 binding protein 10   5'-nucleotidase, cytosolic III-like                     |
| 10466530               | 2.22        | Pcsk5          | proprotein convertase subtilisin/kexin type 5                                      |
| 10356082               | 2.22        | Plscr1         | phospholipid scramblase 1                                                          |
| 10358591               | 2.22        | Hmcn1          | hemicentin 1                                                                       |
| 10432907               | 2.22        | Krt78          | keratin 78                                                                         |
| 10593032               | 2.22        | Amica1 Gm10684 | adhesion molecule, interacts with CXADR antigen 1   predicted gene 10684           |
| 10561918               | 2.22        |                |                                                                                    |
| 10503448               | 2.22        | Mmp16          | matrix metalloproteinase 16                                                        |
| 10372652               | 2.21        | Lyz1           | lysozyme 1                                                                         |
| 10575976               | 2.21        | Crispld2       | cysteine-rich secretory protein LCCL domain containing 2                           |
| 10418506               | 2.21        | Stab1          | stabilin 1                                                                         |
| 10548608               | 2.21        | Tas2r106       | taste receptor, type 2, member 106                                                 |
| 10358589               | 2.21        | Hmcn1          | hemicentin 1                                                                       |
| 10432661               | 2.21        | Galnt6         | UDP-N-acetyl-alpha-D-galactosamine:polypeptide N-acetylgalactosaminyltransferase 6 |
| 10531944               | 2.21        | Gm10047        | predicted gene 10047                                                               |
| 10603316               | 2.20        | 2010204K13Rik  | RIKEN cDNA 2010204K13 gene                                                         |
| 10595402               | 2.20        | Fam46a         | family with sequence similarity 46, member A                                       |
| 10347931               | 2.20        | G530012D18Rik  | RIKEN cDNA G530012D1 gene                                                          |

| Transcripts Cluster Id | Fold change | Gene Symbol   | Gene description                                                                    |
|------------------------|-------------|---------------|-------------------------------------------------------------------------------------|
| 10568024               | 2.19        | Coro1a        | coronin, actin binding protein 1A                                                   |
| 10496302               | 2.19        | Manba         | mannosidase, beta A, lysosomal                                                      |
| 10583291               | 2.19        | 2200002K05Rik | RIKEN cDNA 2200002K05 gene                                                          |
| 10523717               | 2.18        | Spp1          | secreted phosphoprotein 1                                                           |
| 10460603               | 2.18        | Efemp2        | epidermal growth factor-containing fibulin-like extracellular matrix protein 2      |
| 10541683               | 2.17        | C1rb C1ra     | complement component 1, r subcomponent B   complement component 1, r subcomponent A |
| 10493824               | 2.17        | S100a7a       | S100 calcium binding protein A7A                                                    |
| 10422496               | 2.17        | Gpr183        | G protein-coupled receptor 183                                                      |
| 10347888               | 2.16        | Ccl20         | chemokine (C-C motif) ligand 20                                                     |
| 10489107               | 2.16        | Samhd1        | SAM domain and HD domain, 1                                                         |
| 10358515               | 2.16        | Hmcn1         | hemicentin 1                                                                        |
| 10365559               | 2.15        | Igf1          | insulin-like growth factor 1                                                        |
| 10367120               | 2.14        | Mir677        | microRNA 677                                                                        |
| 10438854               | 2.14        | Atp13a4       | ATPase type 13A4                                                                    |
| 10557326               | 2.14        | Il4ra         | interleukin 4 receptor, alpha                                                       |
| 10562314               | 2.14        | Abpb          | androgen binding protein beta                                                       |
| 10358633               | 2.14        | Hmcn1         | hemicentin 1                                                                        |
| 10360070               | 2.14        | Fcgr1g        | Fc receptor, IgE, high affinity I, gamma polypeptide                                |
| 10544732               | 2.13        | Skap2         | src family associated phosphoprotein 2                                              |
| 10445826               | 2.13        | Mocs1         | molybdenum cofactor synthesis 1                                                     |
| 10541587               | 2.13        | Clec4a2       | C-type lectin domain family 4, member a2                                            |
| 10475113               | 2.13        | Pla2g4b Jmjd7 | phospholipase A2, group IVB (cytosolic)   jumonji domain containing 7               |
| 10539957               | 2.12        | Vmn1r44       | vomer nasal 1 receptor 44                                                           |
| 10409767               | 2.12        | Golm1         | golgi membrane protein 1                                                            |
| 10504755               | 2.12        |               |                                                                                     |
| 10556509               | 2.11        | Spon1         | spondin 1, (f-spondin) extracellular matrix protein                                 |
| 10429128               | 2.11        | Sla           | src-like adaptor                                                                    |
| 10391066               | 2.11        | Krt17         | keratin 17                                                                          |
| 10583090               | 2.11        | Mmp10         | matrix metalloproteinase 10                                                         |
| 10513739               | 2.11        | Tnc           | tenascin C                                                                          |
| 10384004               | 2.10        | Urgcp         | upregulator of cell proliferation                                                   |
| 10499363               | 2.10        | Bglap         | bone gamma carboxyglutamate protein                                                 |
| 10358569               | 2.10        | Hmcn1         | hemicentin 1                                                                        |
| 10455139               | 2.10        | Pcdhb22       | protocadherin beta 22                                                               |
| 10532741               | 2.10        | Tmem119       | transmembrane protein 119                                                           |
| 10597239               | 2.10        | Pth1r         | parathyroid hormone 1 receptor                                                      |
| 10607363               | 2.10        |               |                                                                                     |
| 10507137               | 2.10        | Pdzk1ip1      | PDZK1 interacting protein 1                                                         |
| 10349947               | 2.09        | Fmod          | fibromodulin                                                                        |
| 10512470               | 2.09        | Cd72          | CD72 antigen                                                                        |
| 10598403               | 2.09        | Praf2         | PRA1 domain family 2                                                                |
| 10432780               | 2.09        | Krt6a         | keratin 6A                                                                          |

| Transcripts Cluster Id | Fold change | Gene Symbol    | Gene description                                                                                             |
|------------------------|-------------|----------------|--------------------------------------------------------------------------------------------------------------|
| 10348896               | 2.09        | Gal3st2 Gm6086 | galactose-3-O-sulfotransferase 2   predicted gene 6086                                                       |
| 10496262               | 2.09        | Nhedc2         | Na <sup>+</sup> /H <sup>+</sup> exchanger domain containing 2                                                |
| 10538590               | 2.09        | Herc5          | hect domain and RLD 5                                                                                        |
| 10422748               | 2.08        | C9             | complement component 9                                                                                       |
| 10600169               | 2.08        | Bgn            | biglycan                                                                                                     |
| 10359266               | 2.07        | Pappa2         | pappalysin 2                                                                                                 |
| 10419288               | 2.07        | Gch1           | GTP cyclohydrolase 1                                                                                         |
| 10483719               | 2.07        | Chn1           | chimerin (chimaerin) 1                                                                                       |
| 10456357               | 2.07        | Pmaip1         | phorbol-12-myristate-13-acetate-induced protein 1                                                            |
| 10497276               | 2.06        | Fabp12         | fatty acid binding protein 12                                                                                |
| 10358654               | 2.06        | Hmcn1          | hemicentin 1                                                                                                 |
| 10595404               | 2.06        | Fam46a         | family with sequence similarity 46, member A                                                                 |
| 10437210               | 2.06        | Bace2          | beta-site APP-cleaving enzyme 2                                                                              |
| 10456653               | 2.06        | Myo5b          | myosin VB                                                                                                    |
| 10540275               | 2.06        | Gxylt2         | glucoside xylosyltransferase 2                                                                               |
| 10471464               | 2.05        | St6galnac6     | ST6 (alpha-N-acetylneuraminyl-2,3-beta-galactosyl-1,3)-N-acetylgalactosaminide alpha-2,6-sialyltransferase 6 |
| 10598359               | 2.05        | Syp            | synaptophysin                                                                                                |
| 10440513               | 2.05        | Cyyr1          | cysteine and tyrosine-rich protein 1                                                                         |
| 10570749               | 2.05        | Defb2          | defensin beta 2                                                                                              |
| 10516735               | 2.05        | Tinag11        | tubulointerstitial nephritis antigen-like 1                                                                  |
| 10500295               | 2.04        | Plekho1        | pleckstrin homology domain containing, family O member 1                                                     |
| 10458382               | 2.04        | Cd14           | CD14 antigen                                                                                                 |
| 10531887               | 2.04        | Slc10a6        | solute carrier family 10 (sodium/bile acid cotransporter family), member 6                                   |
| 10358575               | 2.04        | Hmcn1          | hemicentin 1                                                                                                 |
| 10512640               | 2.04        | Gne            | glucosamine                                                                                                  |
| 10586814               | 2.04        |                |                                                                                                              |
| 10403842               | 2.03        | Elmo1          | engulfment and cell motility 1, ced-12 homolog (C. elegans)                                                  |
| 10401109               | 2.03        | Gpx2           | glutathione peroxidase 2                                                                                     |
| 10482517               | 2.03        | Nmi            | N-myc (and STAT) interactor                                                                                  |
| 10425410               | 2.03        | Grap2          | GRB2-related adaptor protein 2                                                                               |
| 10373918               | 2.03        | Lif            | leukemia inhibitory factor                                                                                   |
| 10592772               | 2.03        | Abcg4          | ATP-binding cassette, sub-family G (WHITE), member 4                                                         |
| 10603551               | 2.02        | Cybb           | cytochrome b-245, beta polypeptide                                                                           |
| 10542981               | 2.02        | Gmfg           | glia maturation factor, gamma                                                                                |
| 10358587               | 2.02        | Hmcn1          | hemicentin 1                                                                                                 |
| 10580608               | 2.02        | 2310039D24Rik  | RIKEN cDNA 2310039D24 gene                                                                                   |
| 10470462               | 2.02        | Col5a1         | collagen, type V, alpha 1                                                                                    |
| 10536667               | 2.02        | Ptprz1         | protein tyrosine phosphatase, receptor type Z, polypeptide 1                                                 |
| 10523195               | 2.02        | Thap6          | THAP domain containing 6                                                                                     |
| 10541446               | 2.02        | Cpamd8         | C3 and PZP-like, alpha-2-macroglobulin domain containing 8                                                   |
| 10519497               | 2.01        | Steap4         | STEAP family member 4                                                                                        |
| 10498053               | 2.01        | 4930583H14Rik  | RIKEN cDNA 4930583H14 gene                                                                                   |
| 10484733               | 2.01        | Olf1174        | olfactory receptor 1174                                                                                      |

| Transcripts Cluster Id | Fold change | Gene Symbol             | Gene description                                                                                                                      |
|------------------------|-------------|-------------------------|---------------------------------------------------------------------------------------------------------------------------------------|
| 10523451               | 2.01        | Anxa3                   | annexin A3                                                                                                                            |
| 10366848               | 2.01        | B4galnt1 Slc26a10       | beta-1,4-N-acetyl-galactosaminyl transferase 1   solute carrier family 26, member 10                                                  |
| 10544273               | 2.01        | Clec5a                  | C-type lectin domain family 5, member a                                                                                               |
| 10476628               | 2.01        | Otor                    | otoraplin                                                                                                                             |
| 10463070               | 2.01        | Entpd1                  | ectonucleoside triphosphate diphosphohydrolase 1                                                                                      |
| 10499358               | 2.01        | Bglap2 Bglap-rs1        | bone gamma-carboxyglutamate protein 2   bone gamma carboxyglutamate protein   bone gamma-carboxyglutamate protein, related sequence 1 |
| 10522666               | 2.01        | 2310040G07Rik           | RIKEN cDNA 2310040G07 gene                                                                                                            |
| 10490159               | 2.00        | Pmepa1                  | prostate transmembrane protein, androgen induced 1                                                                                    |
| 10416215               | 2.00        | Loxl2                   | lysyl oxidase-like 2                                                                                                                  |
| 10474520               | 2.00        | Tdh                     | L-threonine dehydrogenase                                                                                                             |
| 10558769               | 1.99        | Ifitm1                  | interferon induced transmembrane protein 1                                                                                            |
| 10399308               | 1.99        | Fkbp1b                  | FK506 binding protein 1b                                                                                                              |
| 10587829               | 1.99        | Plod2                   | procollagen lysine, 2-oxoglutarate 5-dioxygenase 2                                                                                    |
| 10492590               | 1.99        | Ppm1l                   | protein phosphatase 1 (formerly 2C)-like                                                                                              |
| 10493850               | 1.99        | Sprr2a1 Sprr2a2 Sprr2a3 | small proline-rich protein 2A1   small proline-rich protein 2A2   small proline-rich protein 2A3                                      |
| 10544542               | 1.99        | Zfp786                  | zinc finger protein 786                                                                                                               |
| 10447056               | 1.99        | Qpct                    | glutaminyl-peptide cyclotransferase (glutaminyl cyclase)                                                                              |
| 10583262               | 1.99        | Gm10706                 | predicted gene 10706                                                                                                                  |
| 10546685               | 1.98        | Eif4e3                  | eukaryotic translation initiation factor 4E member 3                                                                                  |
| 10429460               | 1.98        | 7120482A17Rik           | RIKEN cDNA 7120482A17 gene                                                                                                            |
| 10493809               | 1.98        | S100a2                  | S100 calcium binding protein A2                                                                                                       |
| 10498992               | 1.98        | Tlr2                    | toll-like receptor 2                                                                                                                  |
| 10480035               | 1.98        | Pfkfb3                  | 6-phosphofructo-2-kinase/fructose-2,6-biphosphatase 3                                                                                 |
| 10504650               | 1.98        | E230008N13Rik           | RIKEN cDNA E230008N13 gene                                                                                                            |
| 10441244               | 1.97        | Fam3b                   | family with sequence similarity 3, member B                                                                                           |
| 10488816               | 1.97        | Ahcy                    | S-adenosylhomocysteine hydrolase                                                                                                      |
| 10496373               | 1.97        | Ddit4l                  | DNA-damage-inducible transcript 4-like                                                                                                |
| 10556583               | 1.97        | Nucb2                   | nucleobindin 2                                                                                                                        |
| 10547621               | 1.97        | Apobec1                 | apolipoprotein B mRNA editing enzyme, catalytic polypeptide 1                                                                         |
| 10459866               | 1.97        | Slc14a1                 | solute carrier family 14 (urea transporter), member 1                                                                                 |
| 10607124               | 1.97        | Chrdl1                  | chordin-like 1                                                                                                                        |
| 10576118               | 1.96        | 9330133O14Rik           | RIKEN cDNA 9330133O14 gene                                                                                                            |
| 10450325               | 1.96        | Cfb                     | complement factor B                                                                                                                   |
| 10363486               | 1.96        | Lrrc20                  | leucine rich repeat containing 20                                                                                                     |
| 10484894               | 1.96        | Ptpnj                   | protein tyrosine phosphatase, receptor type, J                                                                                        |
| 10587023               | 1.96        | Rab27a                  | RAB27A, member RAS oncogene family                                                                                                    |
| 10561498               | 1.96        | C330005M16Rik           | RIKEN cDNA C330005M16 gene                                                                                                            |
| 10358894               | 1.95        | Sord                    | sorbitol dehydrogenase                                                                                                                |
| 10523845               | 1.95        | Ephx4                   | epoxide hydrolase 4                                                                                                                   |



| Transcripts Cluster Id | Fold change | Gene Symbol          | Gene description                                                                    |
|------------------------|-------------|----------------------|-------------------------------------------------------------------------------------|
| 10371240               | 1.94        | Tle6                 | transducin-like enhancer of split 6, homolog of Drosophila E(spl)                   |
| 10473809               | 1.94        | Sfpi1                | SFFV proviral integration 1                                                         |
| 10475437               | 1.94        | Sord                 | sorbitol dehydrogenase                                                              |
| 10360344               | 1.94        | Darc                 | Duffy blood group, chemokine receptor                                               |
| 10490818               | 1.94        | Stmn2                | stathmin-like 2                                                                     |
| 10489343               | 1.93        | Ptpla                | protein tyrosine phosphatase-like (proline instead of catalytic arginine), member a |
| 10458828               | 1.93        | Cdo1                 | cysteine dioxygenase 1, cytosolic                                                   |
| 10593270               | 1.93        | Ttc12                | tetratricopeptide repeat domain 12                                                  |
| 10488185               | 1.93        | Bfsp1                | beaded filament structural protein 1, in lens-CP94                                  |
| 10412417               | 1.93        | 3110070M22Rik Gm7120 | RIKEN cDNA 3110070M22 gene   predicted gene 7120                                    |
| 10427336               | 1.93        | Nckap11              | NCK associated protein 1 like                                                       |
| 10446965               | 1.93        | Rasgrp3              | RAS, guanyl releasing protein 3                                                     |
| 10558687               | 1.93        | 1190003J15Rik        | RIKEN cDNA 1190003J15 gene                                                          |
| 10517165               | 1.93        | Cd52                 | CD52 antigen                                                                        |
| 10502224               | 1.93        | Sgms2                | sphingomyelin synthase 2                                                            |
| 10602840               | 1.93        | Sh3kbp1              | SH3-domain kinase binding protein 1                                                 |
| 10580469               | 1.93        | Cbln1                | cerebellin 1 precursor protein                                                      |
| 10415604               | 1.92        | Gjb2 Gm10871         | gap junction protein, beta 2   predicted gene 10871                                 |
| 10587194               | 1.92        | Gnb5                 | guanine nucleotide binding protein (G protein), beta 5                              |
| 10362536               | 1.92        |                      |                                                                                     |
| 10419198               | 1.92        | Ero11                | ERO1-like ( <i>S. cerevisiae</i> )                                                  |
| 10491091               | 1.92        | Tnfsf10              | tumor necrosis factor (ligand) superfamily, member 10                               |
| 10439762               | 1.92        | Ahcy                 | S-adenosylhomocysteine hydrolase                                                    |
| 10486552               | 1.92        | Lrrc57               | leucine rich repeat containing 57                                                   |
| 10570612               | 1.92        | Defb5                | defensin beta 5                                                                     |
| 10581538               | 1.92        | Nqo1                 | NAD(P)H dehydrogenase, quinone 1                                                    |
| 10358601               | 1.92        | Hmcn1                | hemicentin 1                                                                        |
| 10575019               | 1.92        | Gm10629              | predicted gene 10629                                                                |
| 10358666               | 1.91        | Hmcn1                | hemicentin 1                                                                        |
| 10589695               | 1.91        | Rtp3                 | receptor transporter protein 3                                                      |
| 10358531               | 1.91        | Hmcn1                | hemicentin 1                                                                        |
| 10344713               | 1.91        | Ahcy                 | S-adenosylhomocysteine hydrolase                                                    |
| 10393559               | 1.91        | Timp2                | tissue inhibitor of metalloproteinase 2                                             |
| 10573924               | 1.91        | Mmp2                 | matrix metalloproteinase 2                                                          |
| 10452571               | 1.91        | Ptprm                | protein tyrosine phosphatase, receptor type, M                                      |
| 10413280               | 1.91        |                      |                                                                                     |
| 10501063               | 1.91        | Cd53                 | CD53 antigen                                                                        |
| 10357604               | 1.91        | Ikbke                | inhibitor of kappaB kinase epsilon                                                  |
| 10534728               | 1.91        | Slc12a9              | solute carrier family 12 (potassium/chloride transporters), member 9                |
| 10550906               | 1.91        | Plaur                | plasminogen activator, urokinase receptor                                           |
| 10585834               | 1.91        | 6030419C18Rik        | RIKEN cDNA 6030419C18 gene                                                          |

| Transcripts<br>Cluster Id | Fold<br>change | Gene Symbol     | Gene description                                                                                                                                       |
|---------------------------|----------------|-----------------|--------------------------------------------------------------------------------------------------------------------------------------------------------|
| 10552494                  | 1.91           | Klk9            | kallikrein related-peptidase 9                                                                                                                         |
| 10587315                  | 1.90           | Gsta4           | glutathione S-transferase, alpha 4                                                                                                                     |
| 10529034                  | 1.90           | Cgref1          | cell growth regulator with EF hand domain 1                                                                                                            |
| 10376019                  | 1.90           | Rpl9-ps3        | ribosomal protein L9, pseudogene 3                                                                                                                     |
| 10398814                  | 1.90           | Kif26a          | kinesin family member 26A                                                                                                                              |
| 10435641                  | 1.90           | Fstl1           | follistatin-like 1                                                                                                                                     |
| 10426606                  | 1.90           | 4930415O20Rik   | RIKEN cDNA 4930415O20 gene                                                                                                                             |
| 10599422                  | 1.90           | 1110059M19Rik   | RIKEN cDNA 1110059M19 gene                                                                                                                             |
| 10355984                  | 1.89           | Serpine2        | serine (or cysteine) peptidase inhibitor, clade E, member 2                                                                                            |
| 10371959                  | 1.89           | Elk3 Cdk17      | ELK3, member of ETS oncogene family   cyclin-dependent kinase 17                                                                                       |
| 10466712                  | 1.89           | Mamdc2          | MAM domain containing 2                                                                                                                                |
| 10417269                  | 1.89           |                 |                                                                                                                                                        |
| 10370721                  | 1.89           | Sbno2           | strawberry notch homolog 2 (Drosophila)                                                                                                                |
| 10552488                  | 1.89           | Klk10           | kallikrein related-peptidase 10                                                                                                                        |
| 10436841                  | 1.89           | Il10rb          | interleukin 10 receptor, beta                                                                                                                          |
| 10458340                  | 1.89           | Hbegf           | heparin-binding EGF-like growth factor                                                                                                                 |
| 10578504                  | 1.89           | 1700029J07Rik   | RIKEN cDNA 1700029J07 gene                                                                                                                             |
| 10404359                  | 1.88           | Mboat1          | membrane bound O-acyltransferase domain containing 1                                                                                                   |
| 10541910                  | 1.88           | Vwf             | Von Willebrand factor homolog                                                                                                                          |
| 10358652                  | 1.88           | Hmcn1           | hemicentin 1                                                                                                                                           |
| 10511375                  | 1.88           | Cyp7a1          | cytochrome P450, family 7, subfamily a, polypeptide 1                                                                                                  |
| 10586168                  | 1.88           | Snord16a        | small nucleolar RNA, C/D box 16A                                                                                                                       |
| 10354576                  | 1.88           | Dnahc7b Dnahc7a | dynein, axonemal, heavy chain 7B   dynein, axonemal, heavy chain 7A                                                                                    |
| 10389672                  | 1.88           | Olf464          | olfactory receptor 464                                                                                                                                 |
| 10595668                  | 1.88           | Ankrd34c        | ankyrin repeat domain 34C                                                                                                                              |
| 10508721                  | 1.87           | Snora44         | small nucleolar RNA, H/ACA box 44                                                                                                                      |
| 10358553                  | 1.87           | Hmcn1           | hemicentin 1                                                                                                                                           |
| 10565255                  | 1.87           | 9930013L23Rik   | RIKEN cDNA 9930013L23 gene                                                                                                                             |
| 10389391                  | 1.87           | Gm11444         | predicted gene 11444                                                                                                                                   |
| 10466000                  | 1.87           | Tmem138         | transmembrane protein 138                                                                                                                              |
| 10534570                  | 1.87           | Orai2           | ORAI calcium release-activated calcium modulator 2                                                                                                     |
| 10505517                  | 1.87           | Tlr4            | toll-like receptor 4                                                                                                                                   |
| 10387568                  | 1.87           | Tnfsf12-Tnfsf13 | Tnfsf12-tnfsf13 readthrough transcript   tumor necrosis factor (ligand) superfamily, member 13   tumor necrosis factor (ligand) superfamily, member 12 |
| 10502355                  | 1.86           | Gm4861          | predicted gene 4861                                                                                                                                    |
| 10496359                  | 1.86           | Emcn            | endomucin                                                                                                                                              |
| 10363070                  | 1.86           | Gp49a Lilrb4    | glycoprotein 49 A   leukocyte immunoglobulin-like receptor, subfamily B, member 4                                                                      |
| 10450484                  | 1.86           | Aif1            | allograft inflammatory factor 1                                                                                                                        |
| 10483865                  | 1.86           | Fkbp7           | FK506 binding protein 7                                                                                                                                |
| 10452485                  | 1.86           | Rab31           | RAB31, member RAS oncogene family                                                                                                                      |
| 10605559                  | 1.86           |                 |                                                                                                                                                        |

| Transcripts Cluster Id | Fold change | Gene Symbol    | Gene description                                                                           |
|------------------------|-------------|----------------|--------------------------------------------------------------------------------------------|
| 10483000               | 1.86        | Itgb6          | integrin beta 6                                                                            |
| 10490611               | 1.86        | Ptk6           | PTK6 protein tyrosine kinase 6                                                             |
| 10401296               | 1.86        | Slc8a3         | solute carrier family 8 (sodium/calcium exchanger), member 3                               |
| 10490212               | 1.86        | Ctsz           | cathepsin Z                                                                                |
| 10541678               | 1.86        | C1ra           | complement component 1, r subcomponent A                                                   |
| 10579012               | 1.85        | Csgalnact1     | chondroitin sulfate N-acetylgalactosaminyltransferase 1                                    |
| 10495891               | 1.85        | Arsj           | arylsulfatase J                                                                            |
| 10422760               | 1.85        | Fyb            | FYN binding protein                                                                        |
| 10570516               | 1.85        | Kbtbd11        | kelch repeat and BTB (POZ) domain containing 11                                            |
| 10385337               | 1.85        | Fabp6          | fatty acid binding protein 6, ileal (gastrotropin)                                         |
| 10431962               | 1.85        | Endou          | endonuclease, polyU-specific                                                               |
| 10591135               | 1.85        | Fat3           | FAT tumor suppressor homolog 3 (Drosophila)                                                |
| 10389389               | 1.85        | Gm10372        | predicted gene 10372                                                                       |
| 10472467               | 1.85        |                |                                                                                            |
| 10348902               | 1.85        | Gal3st2 Gm6086 | galactose-3-O-sulfotransferase 2   predicted gene 6086                                     |
| 10409486               | 1.85        | Pdlim7         | PDZ and LIM domain 7                                                                       |
| 10432711               | 1.84        | Krt84          | keratin 84                                                                                 |
| 10515735               | 1.84        | Szt2           | seizure threshold 2                                                                        |
| 10531556               | 1.84        | Gk2            | glycerol kinase 2                                                                          |
| 10530827               | 1.84        | Spink2         | serine peptidase inhibitor, Kazal type 2                                                   |
| 10563077               | 1.84        | Rcn3           | reticulocalbin 3, EF-hand calcium binding domain                                           |
| 10547088               | 1.84        | Mbd4 Ift122    | methyl-CpG binding domain protein 4   intraflagellar transport 122 homolog (Chlamydomonas) |
| 10513945               | 1.84        | 2310002L09Rik  | RIKEN cDNA 2310002L09 gene                                                                 |
| 10440673               | 1.84        | Krtap14        | keratin associated protein 14                                                              |
| 10530269               | 1.84        | Rbm47          | RNA binding motif protein 47                                                               |
| 10565067               | 1.84        | Nmb            | neuromedin B                                                                               |
| 10378286               | 1.84        | Itgae          | integrin alpha E, epithelial-associated                                                    |
| 10539577               | 1.84        | Spr            | sepiapterin reductase                                                                      |
| 10350742               | 1.84        | Rnasel         | ribonuclease L (2', 5'-oligoadenylate synthetase-dependent)                                |
| 10407435               | 1.84        | Akr1c18        | aldo-keto reductase family 1, member C18                                                   |
| 10358648               | 1.84        | Hmcn1          | hemicentin 1                                                                               |
| 10550840               | 1.84        | Zfp112         | zinc finger protein 112                                                                    |
| 10506870               | 1.84        | Txndc12        | thioredoxin domain containing 12 (endoplasmic reticulum)                                   |
| 10403584               | 1.83        | Nid1           | nidogen 1                                                                                  |
| 10433431               | 1.83        |                |                                                                                            |
| 10537146               | 1.83        | Akr1b8         | aldo-keto reductase family 1, member B8                                                    |
| 10455118               | 1.83        | Pcdhb18        | protocadherin beta 18                                                                      |
| 10564813               | 1.83        | Mesp1          | mesoderm posterior 1                                                                       |
| 10492682               | 1.83        | Fam198b        | family with sequence similarity 198, member B                                              |
| 10487453               | 1.83        | Nphp1          | nephronophthisis 1 (juvenile) homolog (human)                                              |
| 10472047               | 1.83        | Tas2r134       | taste receptor, type 2, member 134                                                         |
| 10517053               | 1.83        | Trnp1          | TMF1-regulated nuclear protein 1                                                           |
| 10358517               | 1.83        | Hmcn1          | hemicentin 1                                                                               |
| 10358535               | 1.83        | Hmcn1          | hemicentin 1                                                                               |

| Transcripts Cluster Id | Fold change | Gene Symbol      | Gene description                                                                                  |
|------------------------|-------------|------------------|---------------------------------------------------------------------------------------------------|
| 10597461               | 1.83        | Cmtm7 Gm9888     | CKLF-like MARVEL transmembrane domain containing 7   predicted gene 9888                          |
| 10493876               | 1.83        | Sprr2h           | small proline-rich protein 2H                                                                     |
| 10355205               | 1.83        | D630023F18Rik    | RIKEN cDNA D630023F18 gene                                                                        |
| 10494271               | 1.83        | Ctss             | cathepsin S                                                                                       |
| 10501199               | 1.83        | Gstm7            | glutathione S-transferase, mu 7                                                                   |
| 10595094               | 1.82        | 2310046A06Rik    | RIKEN cDNA 2310046A06 gene                                                                        |
| 10421143               | 1.82        | Adam28           | a disintegrin and metallopeptidase domain 28                                                      |
| 10485081               | 1.82        | Dgkz             | diacylglycerol kinase zeta                                                                        |
| 10547282               | 1.82        | Zfp9             | zinc finger protein 9                                                                             |
| 10438603               | 1.82        | Igf2bp2          | insulin-like growth factor 2 mRNA binding protein 2                                               |
| 10448836               | 1.82        | Tmem204          | transmembrane protein 204                                                                         |
| 10588263               | 1.82        | Slco2a1          | solute carrier organic anion transporter family, member 2a1                                       |
| 10547206               | 1.82        | Fxyd4            | FXD domain-containing ion transport regulator 4                                                   |
| 10589884               | 1.82        | Bcl2a1c          | B-cell leukemia/lymphoma 2 related protein A1c                                                    |
| 10424404               | 1.82        | Pvt1             | plasmacytoma variant translocation 1                                                              |
| 10399407               | 1.82        | Vsnl1            | visinin-like 1                                                                                    |
| 10466886               | 1.81        |                  |                                                                                                   |
| 10580033               | 1.81        | Cd97             | CD97 antigen                                                                                      |
| 10354777               | 1.81        | Satb2            | special AT-rich sequence binding protein 2                                                        |
| 10455135               | 1.81        | Pcdhb21          | protocadherin beta 21                                                                             |
| 10561025               | 1.81        | Cnfn             | cornifelin                                                                                        |
| 10461110               | 1.81        |                  |                                                                                                   |
| 10580202               | 1.81        | Dand5 Gadd45gip1 | DAN domain family, member 5   growth arrest and DNA-damage-inducible, gamma interacting protein 1 |
| 10355199               | 1.81        | Crygb            | crystallin, gamma B                                                                               |
| 10406504               | 1.81        | Edil3            | EGF-like repeats and discoidin I-like domains 3                                                   |
| 10389222               | 1.81        | Ccl6             | chemokine (C-C motif) ligand 6                                                                    |
| 10534862               | 1.81        | Pcolce           | procollagen C-endopeptidase enhancer protein                                                      |
| 10374453               | 1.81        | Glul             | glutamate-ammonia ligase (glutamine synthetase)                                                   |
| 10526520               | 1.81        | Plod3            | procollagen-lysine, 2-oxoglutarate 5-dioxygenase 3                                                |
| 10600825               | 1.81        | Zc3h12b          | zinc finger CCCH-type containing 12B                                                              |
| 10402630               | 1.81        | Stk30            | serine/threonine kinase 30                                                                        |
| 10363231               | 1.80        | Smpd13a          | sphingomyelin phosphodiesterase, acid-like 3A                                                     |
| 10517687               | 1.80        | Gm16287          | predicted gene 16287                                                                              |
| 10587150               | 1.80        | Myo5c            | myosin VC                                                                                         |
| 10504757               | 1.80        | BC005685         |                                                                                                   |
| 10585048               | 1.80        | Cadm1            | cell adhesion molecule 1                                                                          |
| 10376885               | 1.80        | Snord49b         | small nucleolar RNA, C/D box 49B                                                                  |
| 10576335               | 1.80        | Def8             | differentially expressed in FDCEP 8                                                               |
| 10480468               | 1.80        | Tbpl2            | TATA box binding protein like 2                                                                   |
| 10358567               | 1.80        | Hmcn1            | hemicentin 1                                                                                      |
| 10485117               | 1.80        | Creb3l1          | cAMP responsive element binding protein 3-like 1                                                  |
| 10522060               | 1.80        | Fam114a1         | family with sequence similarity 114, member A1                                                    |
| 10593035               | 1.79        | Tmprss4          | transmembrane protease, serine 4                                                                  |

| Transcripts Cluster Id | Fold change | Gene Symbol                  | Gene description                                                                                                                                                                                |
|------------------------|-------------|------------------------------|-------------------------------------------------------------------------------------------------------------------------------------------------------------------------------------------------|
| 10368806               | 1.79        | Smpd2                        | sphingomyelin phosphodiesterase 2, neutral                                                                                                                                                      |
| 10542836               | 1.79        | Klhdc5                       | kelch domain containing 5                                                                                                                                                                       |
| 10541564               | 1.79        | Clec4a3                      | C-type lectin domain family 4, member a3                                                                                                                                                        |
| 10451763               | 1.79        | Satb1                        | special AT-rich sequence binding protein 1                                                                                                                                                      |
| 10463265               | 1.79        | Cnm1                         | cyclin M1                                                                                                                                                                                       |
| 10471844               | 1.79        | Nek6                         | NIMA (never in mitosis gene a)-related expressed kinase 6                                                                                                                                       |
| 10345807               | 1.79        | Il18r1                       | interleukin 18 receptor 1                                                                                                                                                                       |
| 10593050               | 1.79        | Il10ra                       | interleukin 10 receptor, alpha                                                                                                                                                                  |
| 10569877               | 1.79        | 1810033B17Rik                | RIKEN cDNA 1810033B17 gene                                                                                                                                                                      |
| 10466903               | 1.79        | 4430402I18Rik Slc1a1 Ppapdc2 | RIKEN cDNA 4430402I18 gene   solute carrier family 1 (neuronal/epithelial high affinity glutamate transporter, system Xag), member 1   phosphatidic acid phosphatase type 2 domain containing 2 |
| 10380571               | 1.78        | Gngt2 Abi3                   | guanine nucleotide binding protein (G protein), gamma transducing activity polypeptide 2   ABI gene family, member 3                                                                            |
| 10435565               | 1.78        | Hcls1                        | hematopoietic cell specific Lyn substrate 1                                                                                                                                                     |
| 10467578               | 1.78        | Pik3ap1                      | phosphoinositide-3-kinase adaptor protein 1                                                                                                                                                     |
| 10444258               | 1.78        | Psmb8                        | proteasome (prosome, macropain) subunit, beta type 8 (large multifunctional peptidase 7)                                                                                                        |
| 10495830               | 1.78        | Sec24d                       | Sec24 related gene family, member D ( <i>S. cerevisiae</i> )                                                                                                                                    |
| 10489909               | 1.78        | Ube2v1                       | ubiquitin-conjugating enzyme E2 variant 1                                                                                                                                                       |
| 10512774               | 1.78        | Coro2a                       | coronin, actin binding protein 2A                                                                                                                                                               |
| 10458589               | 1.78        | Preli2                       | PRELI domain containing 2                                                                                                                                                                       |
| 10467887               | 1.78        | Cpn1                         | carboxypeptidase N, polypeptide 1                                                                                                                                                               |
| 10586079               | 1.78        | Itga11                       | integrin alpha 11                                                                                                                                                                               |
| 10471474               | 1.78        | Ak1                          | adenylate kinase 1                                                                                                                                                                              |
| 10361897               | 1.78        | Ifngr1                       | interferon gamma receptor 1                                                                                                                                                                     |
| 10574384               | 1.78        | NdrG4                        | N-myc downstream regulated gene 4                                                                                                                                                               |
| 10406270               | 1.77        | GlrX                         | glutaredoxin                                                                                                                                                                                    |
| 10358631               | 1.77        | Hmcn1                        | hemicentin 1                                                                                                                                                                                    |
| 10405566               | 1.77        | AU042651                     |                                                                                                                                                                                                 |
| 10475027               | 1.77        | Tyro3                        | TYRO3 protein tyrosine kinase 3                                                                                                                                                                 |
| 10501586               | 1.77        | S1pr1                        | sphingosine-1-phosphate receptor 1                                                                                                                                                              |
| 10403023               | 1.77        | Gm7016                       | predicted gene 7016                                                                                                                                                                             |
| 10562761               | 1.77        | Clec11a                      | C-type lectin domain family 11, member a                                                                                                                                                        |
| 10500808               | 1.77        | Olfml3                       | olfactomedin-like 3                                                                                                                                                                             |
| 10363161               | 1.77        | Tmem229b Gm5423              | transmembrane protein 229B   predicted gene 5423                                                                                                                                                |
| 10484888               | 1.77        | Ptprj                        | protein tyrosine phosphatase, receptor type, J                                                                                                                                                  |
| 10402841               | 1.77        | Brf1                         | BRF1 homolog, subunit of RNA polymerase III transcription initiation factor IIIB ( <i>S. cerevisiae</i> )                                                                                       |
| 10455128               | 1.77        | Pcdhb20                      | protocadherin beta 20                                                                                                                                                                           |
| 10456492               | 1.77        | D18Ertd653e                  | DNA segment, Chr 18, ERATO Doi 653, expressed                                                                                                                                                   |
| 10357345               | 1.77        | Nckap5                       | NCK-associated protein 5                                                                                                                                                                        |

| Transcripts Cluster Id | Fold change | Gene Symbol                                                        | Gene description                                                                                                                                                                                                                                                                                        |
|------------------------|-------------|--------------------------------------------------------------------|---------------------------------------------------------------------------------------------------------------------------------------------------------------------------------------------------------------------------------------------------------------------------------------------------------|
| 10494445               | 1.77        | Lix1l                                                              | Lix1-like                                                                                                                                                                                                                                                                                               |
| 10511258               | 1.77        | Fam132a                                                            | family with sequence similarity 132, member A                                                                                                                                                                                                                                                           |
| 10387536               | 1.77        | Cd68                                                               | CD68 antigen                                                                                                                                                                                                                                                                                            |
| 10423471               | 1.77        | Ctnnd2                                                             | catenin (cadherin associated protein), delta 2                                                                                                                                                                                                                                                          |
| 10572865               | 1.77        | Isx                                                                | intestine specific homeobox                                                                                                                                                                                                                                                                             |
| 10366346               | 1.77        | Phlda1                                                             | pleckstrin homology-like domain, family A, member 1                                                                                                                                                                                                                                                     |
| 10531588               | 1.77        | Prkg2                                                              | protein kinase, cGMP-dependent, type II                                                                                                                                                                                                                                                                 |
| 10347919               | 1.76        | A530040E14Rik                                                      | RIKEN cDNA A530040E14 gene                                                                                                                                                                                                                                                                              |
| 10574166               | 1.76        | Cpne2                                                              | copine II                                                                                                                                                                                                                                                                                               |
| 10515981               | 1.76        | Mir30e                                                             | microRNA 30e                                                                                                                                                                                                                                                                                            |
| 10494817               | 1.76        | Ngf                                                                | nerve growth factor                                                                                                                                                                                                                                                                                     |
| 10492355               | 1.76        | Mme                                                                | membrane metallo endopeptidase                                                                                                                                                                                                                                                                          |
| 10538126               | 1.76        | Gimap4                                                             | GTPase, IMAP family member 4                                                                                                                                                                                                                                                                            |
| 10356291               | 1.76        | A530040E14Rik                                                      | RIKEN cDNA A530040E14 gene                                                                                                                                                                                                                                                                              |
| 10487575               | 1.76        | Gm10762                                                            | predicted gene 10762                                                                                                                                                                                                                                                                                    |
| 10415411               | 1.76        | Nynrin                                                             | NYN domain and retroviral integrase containing                                                                                                                                                                                                                                                          |
| 10481518               | 1.76        | Ptges                                                              | prostaglandin E synthase                                                                                                                                                                                                                                                                                |
| 10447294               | 1.76        | Prkce                                                              | protein kinase C, epsilon                                                                                                                                                                                                                                                                               |
| 10412911               | 1.76        |                                                                    |                                                                                                                                                                                                                                                                                                         |
| 10538901               | 1.76        | BC005685                                                           |                                                                                                                                                                                                                                                                                                         |
| 10585438               | 1.76        | Crabp1                                                             | cellular retinoic acid binding protein I                                                                                                                                                                                                                                                                |
| 10481291               | 1.76        | Gtf3c5                                                             | general transcription factor IIIC, polypeptide 5                                                                                                                                                                                                                                                        |
| 10401935               | 1.76        | BC005685                                                           |                                                                                                                                                                                                                                                                                                         |
| 10582860               | 1.76        | A530040E14Rik                                                      | RIKEN cDNA A530040E14 gene                                                                                                                                                                                                                                                                              |
| 10472162               | 1.76        | Gpd2                                                               | glycerol phosphate dehydrogenase 2, mitochondrial                                                                                                                                                                                                                                                       |
| 10582877               | 1.76        | A530040E14Rik                                                      | RIKEN cDNA A530040E14 gene                                                                                                                                                                                                                                                                              |
| 10467124               | 1.76        | Acta2                                                              | actin, alpha 2, smooth muscle, aorta                                                                                                                                                                                                                                                                    |
| 10447885               | 1.76        | Acat3 Tcp1                                                         | acetyl-Coenzyme A acetyltransferase 3   t-complex protein 1                                                                                                                                                                                                                                             |
| 10494978               | 1.76        | Ptpn22                                                             | protein tyrosine phosphatase, non-receptor type 22 (lymphoid)                                                                                                                                                                                                                                           |
| 10424670               | 1.76        | Hemt1 Gml                                                          | hematopoietic cell transcript 1   GPI anchored molecule like protein                                                                                                                                                                                                                                    |
| 10469811               | 1.76        | Il1f10                                                             | interleukin 1 family, member 10                                                                                                                                                                                                                                                                         |
| 10591116               | 1.76        | Fat3                                                               | FAT tumor suppressor homolog 3 (Drosophila)                                                                                                                                                                                                                                                             |
| 10411595               | 1.76        | Naip2                                                              | NLR family, apoptosis inhibitory protein 2                                                                                                                                                                                                                                                              |
| 10490775               | 1.76        | Gm10748                                                            | predicted gene 10748                                                                                                                                                                                                                                                                                    |
| 10358583               | 1.75        | Hmcn1                                                              | hemicentin 1                                                                                                                                                                                                                                                                                            |
| 10559467               | 1.75        | Pira1 Pira2 Pira6 Pira7 Pira11 Lilra6 Gm15448 Gm10693 LOC100046578 | paired-Ig-like receptor A1   paired-Ig-like receptor A2   paired-Ig-like receptor A6   paired-Ig-like receptor A7   paired-Ig-like receptor A11   leukocyte immunoglobulin-like receptor, subfamily A (with TM domain), member 6   predicted gene 15448   predicted pseudogene 10693   similar to PIRA2 |
| 10560313               | 1.75        |                                                                    |                                                                                                                                                                                                                                                                                                         |
| 10402283               | 1.75        | Itpk1                                                              | inositol 1,3,4-triphosphate 5/6 kinase                                                                                                                                                                                                                                                                  |
| 10351224               | 1.75        | F5                                                                 | coagulation factor V                                                                                                                                                                                                                                                                                    |
| 10399586               | 1.75        | Zfp125                                                             | zinc finger protein 125                                                                                                                                                                                                                                                                                 |

| Transcripts Cluster Id | Fold change | Gene Symbol                                     | Gene description                                                                                                                                                                                                                                        |
|------------------------|-------------|-------------------------------------------------|---------------------------------------------------------------------------------------------------------------------------------------------------------------------------------------------------------------------------------------------------------|
| 10559454               | 1.75        | Pira11 Pira7 Pira6 Lilra6 Pira2 Gm15448 Gm10693 | paired-Ig-like receptor A11   paired-Ig-like receptor A7   paired-Ig-like receptor A6   leukocyte immunoglobulin-like receptor, subfamily A (with TM domain), member 6   paired-Ig-like receptor A2   predicted gene 15448   predicted pseudogene 10693 |
| 10576332               | 1.75        | Tubb3 Mc1r                                      | tubulin, beta 3   melanocortin 1 receptor                                                                                                                                                                                                               |
| 10439016               | 1.75        | 4930444G20Rik AF366264                          | RIKEN cDNA 4930444G20 gene   cDNA sequence AF366264                                                                                                                                                                                                     |
| 10429547               | 1.75        | Cyp11b2                                         | cytochrome P450, family 11, subfamily b, polypeptide 2                                                                                                                                                                                                  |
| 10515115               | 1.75        | Slc5a9                                          | solute carrier family 5 (sodium/glucose cotransporter), member 9                                                                                                                                                                                        |
| 10468329               | 1.75        | Obfc1                                           | oligonucleotide/oligosaccharide-binding fold containing 1                                                                                                                                                                                               |
| 10543544               | 1.75        | Lrrc4                                           | leucine rich repeat containing 4                                                                                                                                                                                                                        |
| 10438445               | 1.75        | Klhl6                                           | kelch-like 6 (Drosophila)                                                                                                                                                                                                                               |
| 10583008               | 1.75        | Casp12                                          | caspase 12                                                                                                                                                                                                                                              |
| 10537499               | 1.75        | Tas2r137                                        | taste receptor, type 2, member 137                                                                                                                                                                                                                      |
| 10424543               | 1.75        | Wisp1                                           | WNT1 inducible signaling pathway protein 1                                                                                                                                                                                                              |
| 10465831               | 1.75        | 5730408K05Rik                                   | RIKEN cDNA 5730408K05 gene                                                                                                                                                                                                                              |
| 10366653               | 1.74        | Wif1                                            | Wnt inhibitory factor 1                                                                                                                                                                                                                                 |
| 10384725               | 1.74        | Rel                                             | reticuloendotheliosis oncogene                                                                                                                                                                                                                          |
| 10561142               | 1.74        | Nlrp9c                                          | NLR family, pyrin domain containing 9C                                                                                                                                                                                                                  |
| 10593499               | 1.74        | AI593442                                        |                                                                                                                                                                                                                                                         |
| 10539517               | 1.74        | Dysf                                            | dysferlin                                                                                                                                                                                                                                               |
| 10516906               | 1.74        | Snora73b                                        | small nucleolar RNA, H/ACA box 73b                                                                                                                                                                                                                      |
| 10442565               | 1.74        | Nox1                                            | NADPH oxidase organizer 1                                                                                                                                                                                                                               |
| 10598794               | 1.74        |                                                 |                                                                                                                                                                                                                                                         |
| 10531342               | 1.74        | U90926                                          |                                                                                                                                                                                                                                                         |
| 10517274               | 1.74        | Sepn1                                           | selenoprotein N, 1                                                                                                                                                                                                                                      |
| 10378765               | 1.73        | Dbil5                                           | diazepam binding inhibitor-like 5                                                                                                                                                                                                                       |
| 10503374               | 1.73        |                                                 |                                                                                                                                                                                                                                                         |
| 10360832               | 1.73        | 1700056E22Rik                                   | RIKEN cDNA 1700056E22 gene                                                                                                                                                                                                                              |
| 10391277               | 1.73        | Ghdc                                            | GH3 domain containing                                                                                                                                                                                                                                   |
| 10493860               | 1.73        | Spr2b                                           | small proline-rich protein 2B                                                                                                                                                                                                                           |
| 10590801               | 1.73        | Birc3                                           | baculoviral IAP repeat-containing 3                                                                                                                                                                                                                     |
| 10601421               | 1.73        | A630033H20Rik                                   | RIKEN cDNA A630033H20 gene                                                                                                                                                                                                                              |
| 10489246               | 1.73        | Mafb                                            | v-maf musculoaponeurotic fibrosarcoma oncogene family, protein B (avian)                                                                                                                                                                                |
| 10361926               | 1.73        | Map3k5                                          | mitogen-activated protein kinase kinase kinase 5                                                                                                                                                                                                        |
| 10476321               | 1.73        | Prnd                                            | prion protein dublet                                                                                                                                                                                                                                    |
| 10439312               | 1.73        | Cd86                                            | CD86 antigen                                                                                                                                                                                                                                            |
| 10381962               | 1.73        | Ace                                             | angiotensin I converting enzyme (peptidyl-dipeptidase A) 1                                                                                                                                                                                              |
| 10568601               | 1.73        | BC002195                                        |                                                                                                                                                                                                                                                         |
| 10409713               | 1.73        | Slc28a3                                         | solute carrier family 28 (sodium-coupled nucleoside transporter), member 3                                                                                                                                                                              |
| 10470936               | 1.73        | Tbc1d13                                         | TBC1 domain family, member 13                                                                                                                                                                                                                           |

| Transcripts Cluster Id | Fold change | Gene Symbol  | Gene description                                                                    |
|------------------------|-------------|--------------|-------------------------------------------------------------------------------------|
| 10519140               | 1.73        | Mmp23        | matrix metalloproteinase 23                                                         |
| 10568202               | 1.73        | 1-Sep        | septin 1                                                                            |
| 10358650               | 1.73        | Hmcn1        | hemicentin 1                                                                        |
| 10382421               | 1.73        | Gpr142       | G protein-coupled receptor 142                                                      |
| 10360338               | 1.73        | Fcgr1a       | Fc receptor, IgE, high affinity I, alpha polypeptide                                |
| 10455084               | 1.72        | Pcdhb10      | protocadherin beta 10                                                               |
| 10594909               | 1.72        | Gm10641      | predicted gene 10641                                                                |
| 10413710               | 1.72        | Nt5dc2 Stab1 | 5'-nucleotidase domain containing 2   stabilin 1                                    |
| 10358599               | 1.72        | Hmcn1        | hemicentin 1                                                                        |
| 10425945               | 1.72        | Fbln1        | fibulin 1                                                                           |
| 10429160               | 1.72        | St3gal1      | ST3 beta-galactoside alpha-2,3-sialyltransferase 1                                  |
| 10392221               | 1.72        | Pecam1       | platelet/endothelial cell adhesion molecule 1                                       |
| 10474159               | 1.72        | Apip         | APAF1 interacting protein                                                           |
| 10443980               | 1.72        | Myo1f        | myosin IF                                                                           |
| 10479971               | 1.72        | Gm10855      | predicted gene 10855                                                                |
| 10355403               | 1.72        | Fn1          | fibronectin 1                                                                       |
| 10529235               | 1.72        | Gm10463      | predicted gene 10463                                                                |
| 10396442               | 1.72        | Snopc1       | small nuclear RNA activating complex, polypeptide 1                                 |
| 10352725               | 1.72        | Tmem206      | transmembrane protein 206                                                           |
| 10348537               | 1.72        | Ramp1        | receptor (calcitonin) activity modifying protein 1                                  |
| 10591739               | 1.72        | Acp5         | acid phosphatase 5, tartrate resistant                                              |
| 10466925               | 1.72        | Ak3          | adenylate kinase 3                                                                  |
| 10421615               | 1.72        | Spert        | spermatid associated                                                                |
| 10514956               | 1.72        | Scp2         | sterol carrier protein 2, liver                                                     |
| 10535938               | 1.71        | N4bp2l1      | NEDD4 binding protein 2-like 1                                                      |
| 10531370               | 1.71        | Naaa         | N-acyl ethanolamine acid amidase                                                    |
| 10410078               | 1.71        | Slc35d2      | solute carrier family 35, member D2                                                 |
| 10408523               | 1.71        | Foxq1        | forkhead box Q1                                                                     |
| 10425066               | 1.71        | Csf2rb       | colony stimulating factor 2 receptor, beta, low-affinity (granulocyte-macrophage)   |
| 10511416               | 1.71        | Tox          | thymocyte selection-associated high mobility group box                              |
| 10490913               | 1.71        | Car3         | carbonic anhydrase 3                                                                |
| 10529656               | 1.71        | Nsg1         | neuron specific gene family member 1                                                |
| 10358623               | 1.71        | Hmcn1        | hemicentin 1                                                                        |
| 10406176               | 1.71        | Slc9a3       | solute carrier family 9 (sodium/hydrogen exchanger), member 3                       |
| 10378816               | 1.71        | Slc6a4       | solute carrier family 6 (neurotransmitter transporter, serotonin), member 4         |
| 10439346               | 1.71        | Eaf2         | ELL associated factor 2                                                             |
| 10392449               | 1.71        | Wipi1        | WD repeat domain, phosphoinositide interacting 1                                    |
| 10469695               | 1.71        | Apbb1ip      | amyloid beta (A4) precursor protein-binding, family B, member 1 interacting protein |
| 10505224               | 1.70        | Snx30        | sorting nexin family member 30                                                      |
| 10438708               | 1.70        | Masp1        | mannan-binding lectin serine peptidase 1                                            |
| 10355141               | 1.70        | Klf7         | Kruppel-like factor 7 (ubiquitous)                                                  |



| Transcripts Cluster Id | Fold change | Gene Symbol          | Gene description                                                                  |
|------------------------|-------------|----------------------|-----------------------------------------------------------------------------------|
| 10428960               | 1.70        | Gsdmc2 Gsdmc3 Gsdmc4 | gasdermin C2   gasdermin C3   gasdermin C4   gasdermin C                          |
| 10416956               | 1.70        | Mir19b-1             | microRNA 19b-1                                                                    |
| 10459193               | 1.70        | Ppargc1b             | peroxisome proliferative activated receptor, gamma, coactivator 1 beta            |
| 10551754               | 1.70        | 4930432E11Rik        | RIKEN cDNA 4930432E11 gene                                                        |
| 10460257               | 1.70        | 1700055N04Rik        | RIKEN cDNA 1700055N04 gene                                                        |
| 10498500               | 1.70        | Vmn2r2               | vomeronasal 2, receptor 1   vomeronasal 2, receptor 2   vomeronasal 2, receptor 3 |
| 10541885               | 1.70        | Scnn1a               | sodium channel, nonvoltage-gated 1 alpha                                          |
| 10487595               | 1.69        |                      |                                                                                   |
| 10506594               | 1.69        | Acot11 Fam151a       | acyl-CoA thioesterase 11   family with sequence simliarity 151, member A          |
| 10515841               | 1.69        | Gm12866              | predicted gene 12866                                                              |
| 10543428               | 1.69        | Iqub                 | IQ motif and ubiquitin domain containing                                          |
| 10508723               | 1.69        | Snora61              | small nucleolar RNA, H/ACA box 61                                                 |
| 10520121               | 1.69        |                      |                                                                                   |
| 10565132               | 1.69        | BC048679             |                                                                                   |
| 10533720               | 1.69        | Niacr1               | niacin receptor 1                                                                 |
| 10548307               | 1.69        | Klrb1c               | killer cell lectin-like receptor subfamily B member 1C                            |
| 10398117               | 1.69        | Bdkrb2               | bradykinin receptor, beta 2                                                       |
| 10436752               | 1.69        | Krtap15              | keratin associated protein 15                                                     |
| 10578405               | 1.69        |                      |                                                                                   |
| 10547404               | 1.69        | Erc1                 | ELKS/RAB6-interacting/CAST family member 1                                        |
| 10579468               | 1.69        | Haus8                | 4HAUS augmin-like complex, subunit 8                                              |
| 10469786               | 1.69        | Il1f9                | interleukin 1 family, member 9                                                    |
| 10439058               | 1.69        | Lrrc33               | leucine rich repeat containing 33                                                 |
| 10402136               | 1.69        | Gpr68                | G protein-coupled receptor 68                                                     |
| 10344837               | 1.69        | Prex2                | phosphatidylinositol-3,4,5-trisphosphate-dependent Rac exchange factor 2          |
| 10398240               | 1.68        | Eml1                 | echinoderm microtubule associated protein like 1                                  |
| 10415081               | 1.68        |                      |                                                                                   |
| 10398859               | 1.68        | Adssl1               | adenylosuccinate synthetase like 1                                                |
| 10380871               | 1.68        | Stard3               | START domain containing 3                                                         |
| 10586076               | 1.68        |                      |                                                                                   |
| 10481949               | 1.68        | Traf1                | TNF receptor-associated factor 1                                                  |
| 10547740               | 1.68        | C1s                  | complement component 1, s subcomponent                                            |
| 10575745               | 1.68        | Atmin                | ATM interactor                                                                    |
| 10567468               | 1.68        | Dnahc3               | dynein, axonemal, heavy chain 3                                                   |
| 10425755               | 1.68        |                      |                                                                                   |
| 10370946               | 1.68        | Mobk12a              | MOB1, Mps One Binder kinase activator-like 2A (yeast)                             |
| 10550593               | 1.68        | Six5                 | sine oculis-related homeobox 5 homolog (Drosophila)                               |
| 10549886               | 1.68        | Zfp264               | zinc finger protein 264                                                           |
| 10603583               | 1.68        | Srpx                 | sushi-repeat-containing protein                                                   |
| 10402325               | 1.68        | Asb2                 | ankyrin repeat and SOCS box-containing 2                                          |
| 10476945               | 1.68        | Cst7                 | cystatin F (leukocystatin)                                                        |

| Transcripts Cluster Id | Fold change | Gene Symbol                                                                                                                                                                         | Gene description                                                                                                                                                                                                                                                                                                                                                                                                                                                                                                                                                                                                                                                                                                                                                                                                                                                             |
|------------------------|-------------|-------------------------------------------------------------------------------------------------------------------------------------------------------------------------------------|------------------------------------------------------------------------------------------------------------------------------------------------------------------------------------------------------------------------------------------------------------------------------------------------------------------------------------------------------------------------------------------------------------------------------------------------------------------------------------------------------------------------------------------------------------------------------------------------------------------------------------------------------------------------------------------------------------------------------------------------------------------------------------------------------------------------------------------------------------------------------|
| 10373768               | 1.68        | Selm                                                                                                                                                                                | selenoprotein M                                                                                                                                                                                                                                                                                                                                                                                                                                                                                                                                                                                                                                                                                                                                                                                                                                                              |
| 10421917               | 1.68        | Pabpc4                                                                                                                                                                              | poly(A) binding protein, cytoplasmic 4                                                                                                                                                                                                                                                                                                                                                                                                                                                                                                                                                                                                                                                                                                                                                                                                                                       |
| 10485633               | 1.68        | Gm10796                                                                                                                                                                             | predicted gene 10796                                                                                                                                                                                                                                                                                                                                                                                                                                                                                                                                                                                                                                                                                                                                                                                                                                                         |
| 10484283               | 1.68        | Pde1a                                                                                                                                                                               | phosphodiesterase 1A, calmodulin-dependent                                                                                                                                                                                                                                                                                                                                                                                                                                                                                                                                                                                                                                                                                                                                                                                                                                   |
| 10482030               | 1.68        | Stom                                                                                                                                                                                | stomatin                                                                                                                                                                                                                                                                                                                                                                                                                                                                                                                                                                                                                                                                                                                                                                                                                                                                     |
| 10359282               | 1.67        | Pappa2                                                                                                                                                                              | pappalysin 2                                                                                                                                                                                                                                                                                                                                                                                                                                                                                                                                                                                                                                                                                                                                                                                                                                                                 |
| 10479510               | 1.67        | Col20a1 9230112E08Rik                                                                                                                                                               | collagen, type XX, alpha 1   RIKEN cDNA 9230112E08 gene                                                                                                                                                                                                                                                                                                                                                                                                                                                                                                                                                                                                                                                                                                                                                                                                                      |
| 10561031               | 1.67        | Lipe                                                                                                                                                                                | lipase, hormone sensitive                                                                                                                                                                                                                                                                                                                                                                                                                                                                                                                                                                                                                                                                                                                                                                                                                                                    |
| 10384154               | 1.67        | Myo1g                                                                                                                                                                               | myosin IG                                                                                                                                                                                                                                                                                                                                                                                                                                                                                                                                                                                                                                                                                                                                                                                                                                                                    |
| 10605986               | 1.67        | Slc7a3                                                                                                                                                                              | solute carrier family 7 (cationic amino acid transporter, y+ system), member 3                                                                                                                                                                                                                                                                                                                                                                                                                                                                                                                                                                                                                                                                                                                                                                                               |
| 10466935               | 1.67        | Rln1                                                                                                                                                                                | relaxin 1                                                                                                                                                                                                                                                                                                                                                                                                                                                                                                                                                                                                                                                                                                                                                                                                                                                                    |
| 10461160               | 1.67        |                                                                                                                                                                                     |                                                                                                                                                                                                                                                                                                                                                                                                                                                                                                                                                                                                                                                                                                                                                                                                                                                                              |
| 10563816               | 1.67        | Fancf Gas2                                                                                                                                                                          | Fanconi anemia, complementation group F   growth arrest specific 2                                                                                                                                                                                                                                                                                                                                                                                                                                                                                                                                                                                                                                                                                                                                                                                                           |
| 10474096               | 1.67        | Lrrc4c                                                                                                                                                                              | leucine rich repeat containing 4C                                                                                                                                                                                                                                                                                                                                                                                                                                                                                                                                                                                                                                                                                                                                                                                                                                            |
| 10523766               | 1.67        | Lrrc8c                                                                                                                                                                              | leucine rich repeat containing 8 family, member C                                                                                                                                                                                                                                                                                                                                                                                                                                                                                                                                                                                                                                                                                                                                                                                                                            |
| 10598309               | 1.67        | Cacna1f                                                                                                                                                                             | calcium channel, voltage-dependent, alpha 1F subunit                                                                                                                                                                                                                                                                                                                                                                                                                                                                                                                                                                                                                                                                                                                                                                                                                         |
| 10471967               | 1.67        | Mbd5                                                                                                                                                                                | methyl-CpG binding domain protein 5                                                                                                                                                                                                                                                                                                                                                                                                                                                                                                                                                                                                                                                                                                                                                                                                                                          |
| 10497920               | 1.67        | Ankrd50                                                                                                                                                                             | ankyrin repeat domain 50                                                                                                                                                                                                                                                                                                                                                                                                                                                                                                                                                                                                                                                                                                                                                                                                                                                     |
| 10375751               | 1.67        | Adamts2                                                                                                                                                                             | a disintegrin-like and metallopeptidase (reprolysin type) with thrombospondin type 1 motif, 2                                                                                                                                                                                                                                                                                                                                                                                                                                                                                                                                                                                                                                                                                                                                                                                |
| 10457587               | 1.67        | Zfp521                                                                                                                                                                              | zinc finger protein 521                                                                                                                                                                                                                                                                                                                                                                                                                                                                                                                                                                                                                                                                                                                                                                                                                                                      |
| 10578264               | 1.67        | Msr1                                                                                                                                                                                | macrophage scavenger receptor 1                                                                                                                                                                                                                                                                                                                                                                                                                                                                                                                                                                                                                                                                                                                                                                                                                                              |
| 10462363               | 1.67        | Jak2                                                                                                                                                                                | Janus kinase 2                                                                                                                                                                                                                                                                                                                                                                                                                                                                                                                                                                                                                                                                                                                                                                                                                                                               |
| 10452648               | 1.67        | Emilin2                                                                                                                                                                             | elastin microfibril interfacier 2                                                                                                                                                                                                                                                                                                                                                                                                                                                                                                                                                                                                                                                                                                                                                                                                                                            |
| 10455148               | 1.67        | Pcdhga12 Pcdhga3 Pcdhga8 Pcdhga9 Pcdhgb1 Pcdhgb6 Pcdhgc3 Pcdhgc4 Pcdhga11 Pcdhga7 Pcdhgb2 Pcdhga6 Pcdhgb5 Pcdhgb8 Pcdhgc5 Pcdhga4 Pcdhga5 Pcdhga10 Pcdhga2 Pcdhgb4 Pcdhgb7 Pcdha4-g | protocadherin gamma subfamily A, 12   protocadherin gamma subfamily A, 3   protocadherin gamma subfamily A, 8   protocadherin gamma subfamily A, 9   protocadherin gamma subfamily B, 1   protocadherin gamma subfamily B, 6   protocadherin gamma subfamily C, 3   protocadherin gamma subfamily C, 4   protocadherin gamma subfamily A, 11   protocadherin gamma subfamily A, 7   protocadherin gamma subfamily B, 2   protocadherin gamma subfamily A, 6   protocadherin gamma subfamily B, 5   protocadherin gamma subfamily B, 8   protocadherin gamma subfamily C, 5   protocadherin gamma subfamily A, 4   protocadherin gamma subfamily A, 5   protocadherin gamma subfamily A, 1   protocadherin gamma subfamily A, 10   protocadherin gamma subfamily A, 2   protocadherin gamma subfamily B, 4   protocadherin gamma subfamily B, 7   protocadherin alpha 4-gamma |
| 10522075               | 1.67        | Klhl5                                                                                                                                                                               | kelch-like 5 (Drosophila)                                                                                                                                                                                                                                                                                                                                                                                                                                                                                                                                                                                                                                                                                                                                                                                                                                                    |
| 10390032               | 1.67        | Acsf2                                                                                                                                                                               | acyl-CoA synthetase family member 2                                                                                                                                                                                                                                                                                                                                                                                                                                                                                                                                                                                                                                                                                                                                                                                                                                          |

| Transcripts Cluster Id | Fold change | Gene Symbol        | Gene description                                                                                             |
|------------------------|-------------|--------------------|--------------------------------------------------------------------------------------------------------------|
| 10466659               | 1.67        | Gda                | guanine deaminase                                                                                            |
| 10583870               | 1.66        | Bmper              | BMP-binding endothelial regulator                                                                            |
| 10475643               | 1.66        | Fgf7               | fibroblast growth factor 7                                                                                   |
| 10523693               | 1.66        | Dmp1               | dentin matrix protein 1                                                                                      |
| 10403220               | 1.66        | Abcb5              | ATP-binding cassette, sub-family B (MDR/TAP), member 5                                                       |
| 10419151               | 1.66        | Ear1               | eosinophil-associated, ribonuclease A family, member 1                                                       |
| 10469712               | 1.66        | Pdss1              | prenyl (solanesyl) diphosphate synthase, subunit 1                                                           |
| 10548552               | 1.66        | Klra2              | killer cell lectin-like receptor, subfamily A, member 2                                                      |
| 10480971               | 1.66        | Snpc4              | small nuclear RNA activating complex, polypeptide 4                                                          |
| 10532169               | 1.66        | Mfsd7a             | major facilitator superfamily domain containing 7A                                                           |
| 10506146               | 1.66        | Gm10305            | predicted gene 10305                                                                                         |
| 10596303               | 1.66        | Acpp               | acid phosphatase, prostate                                                                                   |
| 10599008               | 1.66        | Slc6a14            | solute carrier family 6 (neurotransmitter transporter), member 14                                            |
| 10358490               | 1.66        | Hmcn1              | hemicentin 1                                                                                                 |
| 10472181               | 1.66        | Galnt5 Ernm        | UDP-N-acetyl-alpha-D-galactosamine:polypeptide N-acetylgalactosaminyltransferase 5   ermin, ERM-like protein |
| 10408741               | 1.66        | Txndc5             | thioredoxin domain containing 5                                                                              |
| 10534002               | 1.66        | Tmem132d           | transmembrane protein 132D                                                                                   |
| 10397633               | 1.66        | Flrt2              | fibronectin leucine rich transmembrane protein 2                                                             |
| 10565204               | 1.66        | Bnc1               | basonuclin 1                                                                                                 |
| 10422436               | 1.66        | Dock9              | dedicator of cytokinesis 9                                                                                   |
| 10412699               | 1.66        | Gm10404            | predicted gene 10404                                                                                         |
| 10505994               | 1.66        | Fggy               | FGGY carbohydrate kinase domain containing                                                                   |
| 10529903               | 1.66        | Fam184b            | family with sequence similarity 184, member B                                                                |
| 10583316               | 1.66        | Taf1d              | TATA box binding protein (Tbp)-associated factor, RNA polymerase I, D                                        |
| 10538356               | 1.66        | Chn2 9130019P16Rik | chimerin (chimaerin) 2   RIKEN cDNA 9130019P16 gene                                                          |
| 10376956               | 1.66        | Hs3st3a1           | heparan sulfate (glucosamine) 3-O-sulfotransferase 3A1                                                       |
| 10362538               | 1.66        | Lama4              | laminin, alpha 4                                                                                             |
| 10494972               | 1.66        | Bcl2l15            | BCL2-like 15                                                                                                 |
| 10359034               | 1.65        | Qsox1              | quiescin Q6 sulfhydryl oxidase 1                                                                             |
| 10416411               | 1.65        | Esd                | esterase D/formylglutathione hydrolase                                                                       |
| 10507086               | 1.65        | Skint2             | selection and upkeep of intraepithelial T cells 2                                                            |
| 10540289               | 1.65        | Gm9871             | predicted gene 9871                                                                                          |
| 10581175               | 1.65        | B3gnt9             | UDP-GlcNAc:betaGal beta-1,3-N-acetylglucosaminyltransferase 9                                                |
| 10593492               | 1.65        | Zc3h12c            | zinc finger CCCH type containing 12C                                                                         |
| 10567825               | 1.65        | Lat                | linker for activation of T cells                                                                             |
| 10477475               | 1.65        | Plunc              | palate, lung, and nasal epithelium associated                                                                |
| 10440909               | 1.65        |                    |                                                                                                              |
| 10431051               | 1.65        | Scube1             | signal peptide, CUB domain, EGF-like 1                                                                       |
| 10593449               | 1.65        | Layn               | layilin                                                                                                      |
| 10433885               | 1.65        | Cebpd              | CCAAT/enhancer binding protein (C/EBP), delta                                                                |

| Transcripts Cluster Id | Fold change | Gene Symbol             | Gene description                                                                                                 |
|------------------------|-------------|-------------------------|------------------------------------------------------------------------------------------------------------------|
| 10409551               | 1.65        | Pitx1                   | paired-like homeodomain transcription factor 1                                                                   |
| 10428707               | 1.65        | Has2                    | hyaluronan synthase 2                                                                                            |
| 10428998               | 1.65        | Asap1                   | ArfGAP with SH# domain, ankyrin repeat and PH domain1                                                            |
| 10461158               | 1.65        | Snhg1                   | small nucleolar RNA host gene (non-protein coding) 1                                                             |
| 10423556               | 1.65        | Pgcp                    | plasma glutamate carboxypeptidase                                                                                |
| 10358658               | 1.65        | Hmcn1                   | hemicentin 1                                                                                                     |
| 10413148               | 1.65        | A430057M04Rik           | RIKEN cDNA A430057M04 gene                                                                                       |
| 10361995               | 1.65        | Fam54a                  | family with sequence similarity 54, member A                                                                     |
| 10464425               | 1.65        | Grk5                    | G protein-coupled receptor kinase 5                                                                              |
| 10431738               | 1.65        | Prickle1                | prickle homolog 1 (Drosophila)                                                                                   |
| 10545014               | 1.65        | Vopp1                   | vesicular, overexpressed in cancer, prosurvival protein 1                                                        |
| 10348432               | 1.65        | Agap1                   | ArfGAP with GTPase domain, ankyrin repeat and PH domain 1                                                        |
| 10428515               | 1.65        | Csmd3                   | CUB and Sushi multiple domains 3                                                                                 |
| 10509280               | 1.65        | Hspg2                   | perlecan (heparan sulfate proteoglycan 2)                                                                        |
| 10575993               | 1.64        | 6430548M08Rik           | RIKEN cDNA 6430548M08 gene                                                                                       |
| 10492021               | 1.64        | Postn A630052E07<br>Rik | periostin, osteoblast specific factor   RIKEN cDNA A630052E07 gene                                               |
| 10369615               | 1.64        | Srgn                    | serglycin                                                                                                        |
| 10358617               | 1.64        | Hmcn1                   | hemicentin 1                                                                                                     |
| 10541555               | 1.64        | Clec4a1                 | C-type lectin domain family 4, member a1                                                                         |
| 10389214               | 1.64        | Ccl9                    | chemokine (C-C motif) ligand 9                                                                                   |
| 10530029               | 1.64        | Lgi2                    | leucine-rich repeat LGI family, member 2                                                                         |
| 10607950               | 1.64        | G530011O06Rik           | RIKEN cDNA G530011O06 gene                                                                                       |
| 10604713               | 1.64        | Arhgef6                 | Rac/Cdc42 guanine nucleotide exchange factor (GEF) 6                                                             |
| 10460237               | 1.64        | Unc93b1                 | unc-93 homolog B1 (C. elegans)                                                                                   |
| 10448184               | 1.64        | 4930515G13Rik           | RIKEN cDNA 4930515G13 gene                                                                                       |
| 10587038               | 1.64        | 2410004A20Rik           | RIKEN cDNA 2410004A20 gene                                                                                       |
| 10371332               | 1.64        | Aldh1l2                 | aldehyde dehydrogenase 1 family, member L2                                                                       |
| 10422628               | 1.64        | Plcx3                   | phosphatidylinositol-specific phospholipase C, X domain containing 3                                             |
| 10459730               | 1.64        | Me2                     | malic enzyme 2, NAD(+)-dependent, mitochondrial                                                                  |
| 10527158               | 1.64        | Fscn1                   | fascin homolog 1, actin bundling protein (Strongylocentrotus purpuratus)                                         |
| 10409240               | 1.64        | Sema4d                  | sema domain, immunoglobulin domain (Ig), transmembrane domain (TM) and short cytoplasmic domain, (semaphorin) 4D |
| 10394770               | 1.64        | Odc1                    | ornithine decarboxylase, structural 1                                                                            |
| 10362314               | 1.64        | Ptprk                   | protein tyrosine phosphatase, receptor type, K                                                                   |
| 10517488               | 1.64        | Ephb2                   | Eph receptor B2                                                                                                  |
| 10564849               | 1.64        | 2610034B18Rik           | RIKEN cDNA 2610034B18 gene                                                                                       |
| 10453026               | 1.64        | Prkd3                   | protein kinase D3                                                                                                |
| 10358613               | 1.64        | Hmcn1                   | hemicentin 1                                                                                                     |
| 10527982               | 1.64        | A330021E22Rik           | RIKEN cDNA A330021E22 gene                                                                                       |
| 10351658               | 1.63        | Cd48                    | CD48 antigen                                                                                                     |
| 10410931               | 1.63        | Vcan                    | versican                                                                                                         |

| Transcripts Cluster Id | Fold change | Gene Symbol    | Gene description                                                                                                 |
|------------------------|-------------|----------------|------------------------------------------------------------------------------------------------------------------|
| 10404521               | 1.63        | Bphl           | biphenyl hydrolase-like (serine hydrolase, breast epithelial mucin-associated antigen)                           |
| 10409202               | 1.63        |                |                                                                                                                  |
| 10507908               | 1.63        | Fhl3           | four and a half LIM domains 3                                                                                    |
| 10386758               | 1.63        | Slc5a10 Fam83g | solute carrier family 5 (sodium/glucose cotransporter), member 10   family with sequence similarity 83, member G |
| 10575917               | 1.63        | Wfdc1          | WAP four-disulfide core domain 1                                                                                 |
| 10437552               | 1.63        | AU021092       |                                                                                                                  |
| 10516046               | 1.63        | Gm12877        | predicted gene 12877                                                                                             |
| 10376959               | 1.63        | Elac2          | elaC homolog 2 (E. coli)                                                                                         |
| 10436865               | 1.63        | Ifngr2         | interferon gamma receptor 2                                                                                      |
| 10407955               | 1.63        | Epdr1          | ependymin related protein 1 (zebrafish)                                                                          |
| 10584700               | 1.63        | Dpagt1         | dolichyl-phosphate (UDP-N-acetylglucosamine) acetylglucosaminephosphotransferase 1 (GlcNAc-1-P transferase)      |
| 10484463               | 1.63        | Serping1       | serine (or cysteine) peptidase inhibitor, clade G, member 1                                                      |
| 10425092               | 1.63        | Cyth4          | cytohesin 4                                                                                                      |
| 10392347               | 1.63        | Pitpnc1        | phosphatidylinositol transfer protein, cytoplasmic 1                                                             |
| 10356880               | 1.63        | St8sia4        | ST8 alpha-N-acetyl-neuraminide alpha-2,8-sialyltransferase 4                                                     |
| 10344725               | 1.63        | Adhfe1         | alcohol dehydrogenase, iron containing, 1                                                                        |
| 10377859               | 1.62        | Pld2           | phospholipase D2                                                                                                 |
| 10584891               | 1.62        | Fxyd2          | FXDYD domain-containing ion transport regulator 2                                                                |
| 10529260               | 1.62        | C330019G07Rik  | RIKEN cDNA C330019G07 gene                                                                                       |
| 10362073               | 1.62        | Sgk1           | serum/glucocorticoid regulated kinase 1                                                                          |
| 10360806               | 1.62        | Capn2          | calpain 2                                                                                                        |
| 10508770               | 1.62        | Gm13033        | prostaglandin-endoperoxide synthase 2 pseudogene                                                                 |
| 10507851               | 1.62        | Pabpc4         | poly(A) binding protein, cytoplasmic 4                                                                           |
| 10365640               | 1.62        | Slc5a8         | solute carrier family 5 (iodide transporter), member 8                                                           |
| 10481011               | 1.62        | Inpp5e Pmpca   | inositol polyphosphate-5-phosphatase E   peptidase (mitochondrial processing) alpha                              |
| 10474596               | 1.62        | Aven           | apoptosis, caspase activation inhibitor                                                                          |
| 10417273               | 1.62        | Esd            | esterase D/formylglutathione hydrolase                                                                           |
| 10538138               | 1.62        | Gimap1         | GTPase, IMAP family member 1                                                                                     |
| 10374406               | 1.62        | Cnrip1 Plek    | cannabinoid receptor interacting protein 1   pleckstrin                                                          |
| 10491721               | 1.62        | Spry1          | sprouty homolog 1 (Drosophila)                                                                                   |
| 10349953               | 1.62        | Chit1          | chitinase 1 (chitotriosidase)                                                                                    |
| 10515797               | 1.62        | Tmem125        | transmembrane protein 125                                                                                        |
| 10551666               | 1.62        | Map4k1         | mitogen-activated protein kinase kinase kinase kinase 1                                                          |
| 10403871               | 1.62        | Aoah           | acyloxyacyl hydrolase                                                                                            |
| 10576973               | 1.61        | Col4a1         | collagen, type IV, alpha 1                                                                                       |
| 10505954               | 1.61        | Tek            | endothelial-specific receptor tyrosine kinase                                                                    |
| 10417048               | 1.61        | Hs6st3         | heparan sulfate 6-O-sulfotransferase 3                                                                           |
| 10472923               | 1.61        | Ak3l1          | adenylate kinase 3-like 1                                                                                        |
| 10591094               | 1.61        | Fat3           | FAT tumor suppressor homolog 3 (Drosophila)                                                                      |
| 10509590               | 1.61        | Pla2g2e        | phospholipase A2, group IIE                                                                                      |

| Transcripts Cluster Id | Fold change | Gene Symbol                     | Gene description                                                                       |
|------------------------|-------------|---------------------------------|----------------------------------------------------------------------------------------|
| 10534102               | 1.61        | Gusb                            | glucuronidase, beta                                                                    |
| 10402986               | 1.61        |                                 |                                                                                        |
| 10480249               | 1.61        | Ptpla                           | protein tyrosine phosphatase-like (proline instead of catalytic arginine), member a    |
| 10492448               | 1.61        | Ptx3                            | pentraxin related gene                                                                 |
| 10350506               | 1.61        | Fam5c                           | family with sequence similarity 5, member C                                            |
| 10592106               | 1.61        | Tirap                           | toll-interleukin 1 receptor (TIR) domain-containing adaptor protein                    |
| 10584741               | 1.61        | Slc37a4                         | solute carrier family 37 (glucose-6-phosphate transporter), member 4                   |
| 10493692               | 1.61        | Rab13                           | RAB13, member RAS oncogene family                                                      |
| 10349118               | 1.61        | Serpinb12                       | serine (or cysteine) peptidase inhibitor, clade B (ovalbumin), member 12               |
| 10447118               | 1.61        | Gm9959                          | predicted gene 9959                                                                    |
| 10439276               | 1.61        | Fam162a                         | family with sequence similarity 162, member A                                          |
| 10428443               | 1.61        | Kcnc1                           | potassium channel, subfamily V, member 1                                               |
| 10386359               | 1.61        | Guk1                            | guanylate kinase 1                                                                     |
| 10503098               | 1.61        | Lyn                             | Yamaguchi sarcoma viral (v-yes-1) oncogene homolog                                     |
| 10410776               | 1.61        |                                 |                                                                                        |
| 10441017               | 1.61        | Setd4                           | SET domain containing 4                                                                |
| 10423503               | 1.61        | Gm6624                          | predicted gene 6624                                                                    |
| 10386633               | 1.61        | Gm16516                         |                                                                                        |
| 10353729               | 1.61        | Gm5415 4930444G<br>20Rik Gm9839 | predicted gene 5415   RIKEN cDNA 4930444G20 gene   predicted gene 9839                 |
| 10395005               | 1.61        | Kidins220                       | kinase D-interacting substrate 220                                                     |
| 10551803               | 1.61        | Zfp568                          | zinc finger protein 568                                                                |
| 10393387               | 1.61        | Jmjd6                           | jumonji domain containing 6                                                            |
| 10519747               | 1.61        | Sema3e                          | sema domain, immunoglobulin domain (Ig), short basic domain, secreted, (semaphorin) 3E |
| 10460177               | 1.60        | Mtl5                            | metallothionein-like 5, testis-specific (tesmin)                                       |
| 10347790               | 1.60        |                                 |                                                                                        |
| 10470283               | 1.60        | Egfl7                           | EGF-like domain 7                                                                      |
| 10518207               | 1.60        |                                 |                                                                                        |
| 10467508               | 1.60        | Blnc                            | B-cell linker                                                                          |
| 10357590               | 1.60        | Dyrk3                           | dual-specificity tyrosine-(Y)-phosphorylation regulated kinase 3                       |
| 10498707               | 1.60        | Slitrk3                         | SLIT and NTRK-like family, member 3                                                    |
| 10518570               | 1.60        | Pgd                             | phosphogluconate dehydrogenase                                                         |
| 10535189               | 1.60        | Mad111                          | mitotic arrest deficient 1-like 1                                                      |
| 10497399               | 1.60        | Pde7a                           | phosphodiesterase 7A                                                                   |
| 10582275               | 1.60        | Slc7a5                          | solute carrier family 7 (cationic amino acid transporter, y+ system), member 5         |
| 10393936               | 1.60        | Cbr2                            | carbonyl reductase 2                                                                   |
| 10476042               | 1.60        | Tgm3                            | transglutaminase 3, E polypeptide                                                      |
| 10584561               | 1.60        | 9030425E11Rik                   | RIKEN cDNA 9030425E11 gene                                                             |

| Transcripts<br>Cluster Id | Fold<br>change | Gene Symbol        | Gene description                                                                                   |
|---------------------------|----------------|--------------------|----------------------------------------------------------------------------------------------------|
| 10408629                  | 1.60           | 1300014I06Rik      | RIKEN cDNA 1300014I06 gene                                                                         |
| 10568982                  | 1.60           | BC066028           |                                                                                                    |
| 10583732                  | 1.60           | Ldlr               | low density lipoprotein receptor                                                                   |
| 10439955                  | 1.60           | Fam55c             | family with sequence similarity 55, member C                                                       |
| 10375787                  | 1.60           | Olf1378            | olfactory receptor 1378                                                                            |
| 10376988                  | 1.60           | Zkscan6            | zinc finger with KRAB and SCAN domains 6                                                           |
| 10374236                  | 1.60           | Upp1               | uridine phosphorylase 1                                                                            |
| 10364346                  | 1.60           | Dnmt3l             | DNA (cytosine-5-)-methyltransferase 3-like                                                         |
| 10464949                  | 1.60           | Pacs1              | phosphofurin acidic cluster sorting protein 1                                                      |
| 10358038                  | 1.60           | Rnpep              | arginyl aminopeptidase (aminopeptidase B)                                                          |
| 10483110                  | 1.60           | Ifih1              | interferon induced with helicase C domain 1                                                        |
| 10558001                  | 1.60           | Inpp5f             | inositol polyphosphate-5-phosphatase F                                                             |
| 10468869                  | 1.60           | Prdx3              | peroxiredoxin 3                                                                                    |
| 10481272                  | 1.60           | 1700007K13Rik      | RIKEN cDNA 1700007K13 gene                                                                         |
| 10518108                  | 1.60           | Tmem51             | transmembrane protein 51                                                                           |
| 10390059                  | 1.60           | Xylt2              | xylosyltransferase II                                                                              |
| 10542156                  | 1.60           | Clec2d             | C-type lectin domain family 2, member d                                                            |
| 10375331                  | 1.60           | Il12b              | interleukin 12b                                                                                    |
| 10371134                  | 1.59           | Gipc3              | GIPC PDZ domain containing family, member 3                                                        |
| 10570434                  | 1.59           | Ifitm1 Gm7676      | interferon induced transmembrane protein 1   interferon induced transmembrane protein 1 pseudogene |
| 10567335                  | 1.59           | Gde1               | glycerophosphodiester phosphodiesterase 1                                                          |
| 10450191                  | 1.59           | Btnl5              | butyrophilin-like 5                                                                                |
| 10550877                  | 1.59           | Kcnn4              | potassium intermediate/small conductance calcium-activated channel, subfamily N, member 4          |
| 10536294                  | 1.59           | Peg10              | paternally expressed 10                                                                            |
| 10378793                  | 1.59           | Tmigd1             | transmembrane and immunoglobulin domain containing 1                                               |
| 10544199                  | 1.59           | Dennd2a            | DENN/MADD domain containing 2A                                                                     |
| 10549361                  | 1.59           | Tm7sf3             | transmembrane 7 superfamily member 3                                                               |
| 10505998                  | 1.59           | Fggy               | FGGY carbohydrate kinase domain containing                                                         |
| 10536353                  | 1.59           | Dlx6               | distal-less homeobox 6                                                                             |
| 10478928                  | 1.59           | Tshz2              | teashirt zinc finger family member 2                                                               |
| 10399579                  | 1.59           | 1700030C10Rik      | RIKEN cDNA 1700030C10 gene                                                                         |
| 10465494                  | 1.59           | 1700019N12Rik      | RIKEN cDNA 1700019N12 gene                                                                         |
| 10544858                  | 1.59           | 9130019P16Rik Chn2 | RIKEN cDNA 9130019P16 gene   chimerin (chimaerin) 2                                                |
| 10360028                  | 1.59           | Fcgr2b             | Fc receptor, IgG, low affinity IIb                                                                 |
| 10568221                  | 1.59           | Sephs2             | selenophosphate synthetase 2                                                                       |
| 10373651                  | 1.59           | Olf1814            | olfactory receptor 814                                                                             |
| 10375443                  | 1.59           | Havcr2             | hepatitis A virus cellular receptor 2                                                              |
| 10369154                  | 1.59           | Man1a              | mannosidase 1, alpha                                                                               |
| 10367641                  | 1.59           | Mthfd1l            | methylenetetrahydrofolate dehydrogenase (NADP+ dependent) 1-like                                   |
| 10582958                  | 1.59           | Gucyl1a2           | guanylate cyclase 1, soluble, alpha 2                                                              |
| 10538142                  | 1.59           | Gimap5             | GTPase, IMAP family member 5                                                                       |

| Transcripts Cluster Id | Fold change | Gene Symbol         | Gene description                                                          |
|------------------------|-------------|---------------------|---------------------------------------------------------------------------|
| 10348963               | 1.59        | Ctnnap5b            | contactin associated protein-like 5B                                      |
| 10458906               | 1.59        | Ppic                | peptidylprolyl isomerase C                                                |
| 10403825               | 1.59        |                     |                                                                           |
| 10369844               | 1.59        | Bicc1               | bicaudal C homolog 1 (Drosophila)                                         |
| 10597182               | 1.59        | Nbeal2              | neurobeachin-like 2                                                       |
| 10366886               | 1.58        | Arhgap9             | Rho GTPase activating protein 9                                           |
| 10389601               | 1.58        | 1200011M11Rik       | RIKEN cDNA 1200011M11 gene                                                |
| 10504761               | 1.58        | LOC641050           |                                                                           |
| 10535174               | 1.58        | Tmem184a            | transmembrane protein 184a                                                |
| 10568962               | 1.58        | Olf532              | olfactory receptor 532                                                    |
| 10560873               | 1.58        | Tex101              | testis expressed gene 101                                                 |
| 10399228               | 1.58        | Gm6742              | predicted gene 6742                                                       |
| 10405280               | 1.58        | Arl10               | ADP-ribosylation factor-like 10                                           |
| 10445746               | 1.58        | Trem1               | triggering receptor expressed on myeloid cells 1                          |
| 10478698               | 1.58        | Eya2                | eyes absent 2 homolog (Drosophila)                                        |
| 10490653               | 1.58        | Gmeb2               | glucocorticoid modulatory element binding protein 2                       |
| 10542872               | 1.58        | Rps4y2              | ribosomal protein S4, Y-linked 2                                          |
| 10538890               | 1.58        | LOC641050           |                                                                           |
| 10413059               | 1.58        | Vcl                 | vinculin                                                                  |
| 10605256               | 1.58        | Flna                | filamin, alpha                                                            |
| 10346882               | 1.58        | Adam23 LOC100046035 | a disintegrin and metallopeptidase domain 23   similar to ADAM23          |
| 10366712               | 1.58        | Ppm1h               | protein phosphatase 1H (PP2C domain containing)                           |
| 10470948               | 1.58        | Slc39a1             | solute carrier family 39 (zinc transporter), member 1                     |
| 10555401               | 1.58        |                     |                                                                           |
| 10574471               | 1.58        | Cmtm3               | CKLF-like MARVEL transmembrane domain containing 3                        |
| 10355246               | 1.58        | Acadl               | acyl-Coenzyme A dehydrogenase, long-chain                                 |
| 10490559               | 1.58        | Chrna4              | cholinergic receptor, nicotinic, alpha polypeptide 4                      |
| 10504753               | 1.58        | LOC641050           |                                                                           |
| 10443009               | 1.58        | Ergic1              | endoplasmic reticulum-golgi intermediate compartment (ERGIC) 1            |
| 10403076               | 1.58        |                     |                                                                           |
| 10495869               | 1.58        | Tram111             | translocation associated membrane protein 1-like 1                        |
| 10351390               | 1.58        | Tada1               | transcriptional adaptor 1                                                 |
| 10351603               | 1.58        | Arhgap30            | Rho GTPase activating protein 30                                          |
| 10501164               | 1.58        | Csf1                | colony stimulating factor 1 (macrophage)                                  |
| 10492426               | 1.58        | Acsf2               | acyl-CoA synthetase family member 2                                       |
| 10527455               | 1.57        | Cpsf4               | cleavage and polyadenylation specific factor 4                            |
| 10474619               | 1.57        | Fmn1                | formin 1                                                                  |
| 10401160               | 1.57        | Tmem229b            | transmembrane protein 229B                                                |
| 10360479               | 1.57        | Cep170              | centrosomal protein 170                                                   |
| 10413932               | 1.57        | E130203B14Rik       | RIKEN cDNA E130203B14 gene                                                |
| 10604763               | 1.57        | Arpc1b Gm5637       | actin related protein 2/3 complex, subunit 1B   predicted pseudogene 5637 |
| 10416419               | 1.57        | Gm10847             | predicted gene 10847                                                      |



| Transcripts Cluster Id | Fold change | Gene Symbol            | Gene description                                                    |
|------------------------|-------------|------------------------|---------------------------------------------------------------------|
| 10405749               | 1.57        |                        |                                                                     |
| 10405820               | 1.57        | 1810034E14Rik          | RIKEN cDNA 1810034E14 gene                                          |
| 10407946               | 1.57        | Stard3nl               | STARD3 N-terminal like                                              |
| 10586491               | 1.57        | Dapk2                  | death-associated protein kinase 2                                   |
| 10526191               | 1.57        | Gatsl2                 | GATS protein-like 2                                                 |
| 10383833               | 1.57        | Ccdc157                | coiled-coil domain containing 157                                   |
| 10454984               | 1.57        | Wdr55 Dnd1             | WD repeat domain 55   dead end homolog 1 (zebrafish)                |
| 10494804               | 1.57        | Casq2                  | calsequestrin 2                                                     |
| 10389581               | 1.57        | Ypel2                  | yippee-like 2 (Drosophila)                                          |
| 10578045               | 1.57        | Nrg1                   | neuregulin 1                                                        |
| 10489429               | 1.57        | Wfdc5                  | WAP four-disulfide core domain 5                                    |
| 10544452               | 1.57        | Fam115c                | family with sequence similarity 115, member C                       |
| 10383813               | 1.57        | 1700020C11Rik          | RIKEN cDNA 1700020C11 gene                                          |
| 10430166               | 1.57        | Apol7a                 | apolipoprotein L 7a                                                 |
| 10607792               | 1.57        | Glr2                   | glycine receptor, alpha 2 subunit                                   |
| 10424853               | 1.57        | Brp16                  | brain protein 16                                                    |
| 10576581               | 1.57        | Kcnk1                  | potassium channel, subfamily K, member 1                            |
| 10554693               | 1.57        | Stard5                 | StAR-related lipid transfer (START) domain containing 5             |
| 10415472               | 1.57        | Rnf17                  | ring finger protein 17                                              |
| 10511721               | 1.57        |                        |                                                                     |
| 10518069               | 1.57        | Efhd2                  | EF hand domain containing 2                                         |
| 10451559               | 1.57        | 1700001C19Rik AI661453 | RIKEN cDNA 1700001C19 gene   expressed sequence AI661453            |
| 10426284               | 1.57        | Acr                    | acrosin prepropeptide                                               |
| 10508614               | 1.57        | Fabp3                  | fatty acid binding protein 3, muscle and heart                      |
| 10556812               | 1.57        | Lyrml                  | LYR motif containing 1                                              |
| 10462912               | 1.57        | Lgi1                   | leucine-rich repeat LGI family, member 1                            |
| 10563685               | 1.57        | Ptpn5                  | protein tyrosine phosphatase, non-receptor type 5                   |
| 10593497               | 1.57        | Zc3h12c                | zinc finger CCCH type containing 12C                                |
| 10495097               | 1.57        | Adora3                 | adenosine A3 receptor                                               |
| 10472501               | 1.56        | Lass6                  | LAG1 homolog, ceramide synthase 6                                   |
| 10371784               | 1.56        | Nr1h4                  | nuclear receptor subfamily 1, group H, member 4                     |
| 10501235               | 1.56        | Gstm4                  | glutathione S-transferase, mu 4                                     |
| 10488926               | 1.56        | Mmp24 BC029722         | matrix metalloproteinase 24   cDNA sequence BC029722                |
| 10573916               | 1.56        | Irx6                   | Iroquois related homeobox 6 (Drosophila)                            |
| 10541642               | 1.56        | Vmn2r26 Gm6423         | vomer nasal 2, receptor 26   predicted gene 6423                    |
| 10382435               | 1.56        | Gprc5c                 | G protein-coupled receptor, family C, group 5, member C             |
| 10588836               | 1.56        | Gmppb                  | GDP-mannose pyrophosphorylase B                                     |
| 10433797               | 1.56        | Prkdc                  | protein kinase, DNA activated, catalytic polypeptide                |
| 10345482               | 1.56        | Cnnm4                  | cyclin M4                                                           |
| 10578401               | 1.56        | Zfp42                  | zinc finger protein 42                                              |
| 10354247               | 1.56        | Fhl2                   | four and a half LIM domains 2                                       |
| 10508376               | 1.56        | Trim62                 | tripartite motif-containing 62                                      |
| 10587284               | 1.56        | Elov15                 | ELOVL family member 5, elongation of long chain fatty acids (yeast) |

| Transcripts Cluster Id | Fold change | Gene Symbol   | Gene description                                                                                          |
|------------------------|-------------|---------------|-----------------------------------------------------------------------------------------------------------|
| 10444886               | 1.56        | 2300002M23Rik | RIKEN cDNA 2300002M23 gene                                                                                |
| 10527441               | 1.56        | Arpc1b        | actin related protein 2/3 complex, subunit 1B                                                             |
| 10534531               | 1.56        | Ywhag         | tyrosine 3-monooxygenase/tryptophan 5-monooxygenase activation protein, gamma polypeptide                 |
| 10567316               | 1.56        | Tmc7          | transmembrane channel-like gene family 7                                                                  |
| 10349138               | 1.56        | Serpinb11     | serine (or cysteine) peptidase inhibitor, clade B (ovalbumin), member 11                                  |
| 10399470               | 1.56        | Trib2         | tribbles homolog 2 (Drosophila)                                                                           |
| 10521243               | 1.56        | Grk4          | G protein-coupled receptor kinase 4                                                                       |
| 10361906               | 1.56        | Il22ra2       | interleukin 22 receptor, alpha 2                                                                          |
| 10503083               | 1.56        |               |                                                                                                           |
| 10408227               | 1.56        | Hfe           | hemochromatosis                                                                                           |
| 10442098               | 1.56        | Fpr3 Fpr2     | formyl peptide receptor 3   formyl peptide receptor 2                                                     |
| 10506058               | 1.56        | Inadl         | InaD-like (Drosophila)                                                                                    |
| 10462535               | 1.56        | Pten          | phosphatase and tensin homolog                                                                            |
| 10606728               | 1.56        | Gm10344       | predicted gene 10344                                                                                      |
| 10594825               | 1.56        | Aqp9          | aquaporin 9                                                                                               |
| 10484371               | 1.56        | Calclr        | calcitonin receptor-like                                                                                  |
| 10568873               | 1.56        | Adam8         | a disintegrin and metallopeptidase domain 8                                                               |
| 10440550               | 1.56        | Rnf160        | ring finger protein 160                                                                                   |
| 10496023               | 1.56        | Casp6         | caspase 6                                                                                                 |
| 10572449               | 1.56        | Lsm4          | LSM4 homolog, U6 small nuclear RNA associated ( <i>S. cerevisiae</i> )                                    |
| 10394791               | 1.55        |               |                                                                                                           |
| 10594988               | 1.55        | Mapk6         | mitogen-activated protein kinase 6                                                                        |
| 10390498               | 1.55        | 1700001P01Rik | RIKEN cDNA 1700001P01 gene                                                                                |
| 10453678               | 1.55        | Zeb1          | zinc finger E-box binding homeobox 1                                                                      |
| 10433597               | 1.55        | Snx29         | sorting nexin 29                                                                                          |
| 10513362               | 1.55        | Susd1         | sushi domain containing 1                                                                                 |
| 10582712               | 1.55        | Egln1         | EGL nine homolog 1 ( <i>C. elegans</i> )                                                                  |
| 10368981               | 1.55        | Lin28b        | lin-28 homolog B ( <i>C. elegans</i> )                                                                    |
| 10477717               | 1.55        | Procr         | protein C receptor, endothelial                                                                           |
| 10463836               | 1.55        | Gsto1         | glutathione S-transferase omega 1                                                                         |
| 10360349               | 1.55        | Cadm3         | cell adhesion molecule 3                                                                                  |
| 10399457               | 1.55        | Gm6644 Akr1b3 | aldo-keto reductase family 1, member B3-like   aldo-keto reductase family 1, member B3 (aldose reductase) |
| 10556546               | 1.55        | Calcb         | calcitonin-related polypeptide, beta                                                                      |
| 10565794               | 1.55        | Serpinh1      | serine (or cysteine) peptidase inhibitor, clade H, member 1                                               |
| 10516024               | 1.55        | Tmco2         | transmembrane and coiled-coil domains 2                                                                   |
| 10557862               | 1.55        | Itgam         | integrin alpha M                                                                                          |
| 10596403               | 1.55        | Gm7455        | predicted gene 7455                                                                                       |
| 10537169               | 1.55        | Akr1b7        | aldo-keto reductase family 1, member B7                                                                   |
| 10522009               | 1.55        | Pgm1          | phosphoglucomutase 1                                                                                      |
| 10580010               | 1.55        | Pkn1          | protein kinase N1                                                                                         |
| 10374842               | 1.55        | Ccdc88a       | coiled coil domain containing 88A                                                                         |

| Transcripts Cluster Id | Fold change | Gene Symbol   | Gene description                                                                               |
|------------------------|-------------|---------------|------------------------------------------------------------------------------------------------|
| 10420780               | 1.55        | Tdh           | L-threonine dehydrogenase                                                                      |
| 10375578               | 1.55        | Flt4          | FMS-like tyrosine kinase 4                                                                     |
| 10585186               | 1.55        | 1600029D21Rik | RIKEN cDNA 1600029D21 gene                                                                     |
| 10562192               | 1.55        | Fxyd5         | FXYP domain-containing ion transport regulator 5                                               |
| 10450892               | 1.55        | Olf113        | olfactory receptor 113                                                                         |
| 10546884               | 1.55        | Lhfp14        | lipoma HMGIC fusion partner-like protein 4                                                     |
| 10406031               | 1.55        | Lpcat1        | lysophosphatidylcholine acyltransferase 1                                                      |
| 10380260               | 1.55        | Trim25        | tripartite motif-containing 25                                                                 |
| 10391005               | 1.55        | Krt36         | keratin 36                                                                                     |
| 10507040               | 1.55        | Spata6        | spermatogenesis associated 6                                                                   |
| 10436414               | 1.55        | Olf203        | olfactory receptor 203                                                                         |
| 10604076               | 1.55        | Snora69       | small nucleolar RNA, H/ACA box 69                                                              |
| 10370303               | 1.55        | Adarb1        | adenosine deaminase, RNA-specific, B1                                                          |
| 10502156               | 1.55        | Ccdc109b      | coiled-coil domain containing 109B                                                             |
| 10535378               | 1.55        | D430018E03Rik | RIKEN cDNA D430018E03 gene                                                                     |
| 10570627               | 1.55        | Defb7         | defensin beta 7                                                                                |
| 10499864               | 1.55        | Gm7165        | predicted gene 7165                                                                            |
| 10606658               | 1.54        | Trmt2b        | TRM2 tRNA methyltransferase 2 homolog B ( <i>S. cerevisiae</i> )                               |
| 10365983               | 1.54        | Lum           | lumican                                                                                        |
| 10423821               | 1.54        | Baalc         | brain and acute leukemia, cytoplasmic                                                          |
| 10453759               | 1.54        | Gm10554       | predicted gene 10554                                                                           |
| 10564667               | 1.54        | Ntrk3         | neurotrophic tyrosine kinase, receptor, type 3                                                 |
| 10508860               | 1.54        | Slc9a1        | solute carrier family 9 (sodium/hydrogen exchanger), member 1                                  |
| 10561128               | 1.54        | Cyp2s1        | cytochrome P450, family 2, subfamily s, polypeptide 1                                          |
| 10582464               | 1.54        |               |                                                                                                |
| 10439138               | 1.54        | Kalrn         | kalirin, RhoGEF kinase                                                                         |
| 10389010               | 1.54        | 5730455P16Rik | RIKEN cDNA 5730455P16 gene                                                                     |
| 10494795               | 1.54        | Nhlh2         | nescient helix loop helix 2                                                                    |
| 10364502               | 1.54        | Palm          | paralemmin                                                                                     |
| 10530692               | 1.54        | Kdr           | kinase insert domain protein receptor                                                          |
| 10461934               | 1.54        | Trpm6         | transient receptor potential cation channel, subfamily M, member 6                             |
| 10584488               | 1.54        | Olf943 Olf944 | olfactory receptor 943   olfactory receptor 944                                                |
| 10518075               | 1.54        | Fhad1         | forkhead-associated (FHA) phosphopeptide binding domain 1                                      |
| 10513957               | 1.54        | Ptprd         | protein tyrosine phosphatase, receptor type, D                                                 |
| 10538658               | 1.54        | Herc3         | hect domain and RLD 3                                                                          |
| 10345824               | 1.54        | Il18rap       | interleukin 18 receptor accessory protein                                                      |
| 10546454               | 1.54        | Adamts9       | a disintegrin-like and metalloproteinase (reprolysin type) with thrombospondin type 1 motif, 9 |
| 10598023               | 1.54        |               |                                                                                                |
| 10422028               | 1.54        | Tbc1d4        | TBC1 domain family, member 4                                                                   |
| 10364130               | 1.54        | Zfp280b       | zinc finger protein 280B                                                                       |
| 10404612               | 1.54        | Rreb1         | ras responsive element binding protein 1                                                       |

| Transcripts Cluster Id | Fold change | Gene Symbol                            | Gene description                                                                                                                                 |
|------------------------|-------------|----------------------------------------|--------------------------------------------------------------------------------------------------------------------------------------------------|
| 10447649               | 1.54        | Fndc1 LOC100039091                     | fibronectin type III domain containing 1   similar to fibronectin type III domain containing 1                                                   |
| 10544875               | 1.54        | Scrn1                                  | secernin 1                                                                                                                                       |
| 10479230               | 1.54        | Phactr3                                | phosphatase and actin regulator 3                                                                                                                |
| 10358559               | 1.54        | Hmcn1                                  | hemicentin 1                                                                                                                                     |
| 10460371               | 1.54        | Ptprcap Rps6kb2                        | protein tyrosine phosphatase, receptor type, C polypeptide-associated protein   ribosomal protein S6 kinase, polypeptide 2                       |
| 10580085               | 1.54        | Dcaf15                                 | DDB1 and CUL4 associated factor 15                                                                                                               |
| 10358585               | 1.54        | Hmcn1                                  | hemicentin 1                                                                                                                                     |
| 10420114               | 1.54        | Tgm1                                   | transglutaminase 1, K polypeptide                                                                                                                |
| 10551011               | 1.54        | Dmrct2                                 | doublesex and mab-3 related transcription factor like family C2                                                                                  |
| 10385384               | 1.54        | Nipal4                                 | NIPA-like domain containing 4                                                                                                                    |
| 10586017               | 1.54        | Uaca                                   | uveal autoantigen with coiled-coil domains and ankyrin repeats                                                                                   |
| 10385776               | 1.54        | Tcf7                                   | transcription factor 7, T-cell specific                                                                                                          |
| 10361265               | 1.54        | Mir205                                 | microRNA 205                                                                                                                                     |
| 10510167               | 1.54        | Gm13051 Zfp534 Gm13235 Gm13151 Gm13225 | predicted gene 13051   zinc finger protein 534   predicted gene 13235   predicted gene 13151   predicted gene 13225                              |
| 10581479               | 1.54        | Smpd3                                  | sphingomyelin phosphodiesterase 3, neutral                                                                                                       |
| 10532907               | 1.54        | Hnf1a                                  | HNF1 homeobox A                                                                                                                                  |
| 10383168               | 1.54        |                                        |                                                                                                                                                  |
| 10352292               | 1.54        | G370120E05Rik                          | RIKEN cDNA G370120E05 gene                                                                                                                       |
| 10520111               | 1.53        | Nup12                                  | nucleoporin like 2                                                                                                                               |
| 10523853               | 1.53        | Lpcat2b                                | lysophosphatidylcholine acyltransferase 2B                                                                                                       |
| 10601874               | 1.53        | Tceal3 Tceal6 Tceal5                   | transcription elongation factor A (SII)-like 3   transcription elongation factor A (SII)-like 6   transcription elongation factor A (SII)-like 5 |
| 10577757               | 1.53        | Adam9                                  | a disintegrin and metallopeptidase domain 9 (meltrin gamma)                                                                                      |
| 10380976               | 1.53        | Gsdma                                  | gasdermin A                                                                                                                                      |
| 10490854               | 1.53        | Gm13051 Zfp534 Gm13235 Gm13151 Gm13225 | predicted gene 13051   zinc finger protein 534   predicted gene 13235   predicted gene 13151   predicted gene 13225                              |
| 10601659               | 1.53        | Srpx2                                  | sushi-repeat-containing protein, X-linked 2                                                                                                      |
| 10606554               | 1.53        | Nap113                                 | nucleosome assembly protein 1-like 3                                                                                                             |
| 10581299               | 1.53        | Agrp                                   | agouti related protein                                                                                                                           |
| 10518674               | 1.53        | Rbp7                                   | retinol binding protein 7, cellular                                                                                                              |
| 10398414               | 1.53        | Mir381                                 | microRNA 381                                                                                                                                     |
| 10410695               | 1.53        | Rhobtb3                                | Rho-related BTB domain containing 3                                                                                                              |
| 10528036               | 1.53        |                                        |                                                                                                                                                  |
| 10360130               | 1.53        | Nit1                                   | nitrilase 1                                                                                                                                      |
| 10534120               | 1.53        | Asl                                    | argininosuccinate lyase                                                                                                                          |
| 10535025               | 1.53        | Got2                                   | glutamate oxaloacetate transaminase 2, mitochondrial                                                                                             |
| 10544133               | 1.53        | Parp12                                 | poly (ADP-ribose) polymerase family, member 12                                                                                                   |
| 10348299               | 1.53        | 5830472F04Rik                          | RIKEN cDNA 5830472F04 gene                                                                                                                       |

| Transcripts Cluster Id | Fold change | Gene Symbol                                              | Gene description                                                                                                                                                                          |
|------------------------|-------------|----------------------------------------------------------|-------------------------------------------------------------------------------------------------------------------------------------------------------------------------------------------|
| 10358563               | 1.53        | Hmcn1                                                    | hemicentin 1                                                                                                                                                                              |
| 10569985               | 1.53        | BC003267                                                 |                                                                                                                                                                                           |
| 10478133               | 1.53        | Actr5                                                    | ARP5 actin-related protein 5 homolog (yeast)                                                                                                                                              |
| 10535586               | 1.53        | Smurf1                                                   | SMAD specific E3 ubiquitin protein ligase 1                                                                                                                                               |
| 10385926               | 1.53        | Cdc42se2                                                 | CDC42 small effector 2                                                                                                                                                                    |
| 10560983               | 1.53        | Dedd2                                                    | death effector domain-containing DNA binding protein 2                                                                                                                                    |
| 10446423               | 1.53        | 5430411C19Rik                                            | RIKEN cDNA 5430411C19 gene                                                                                                                                                                |
| 10571399               | 1.53        | Zdhhc2                                                   | zinc finger, DHHC domain containing 2                                                                                                                                                     |
| 10398453               | 1.53        | Ppp2r5c                                                  | protein phosphatase 2, regulatory subunit B (B56), gamma isoform                                                                                                                          |
| 10387274               | 1.53        | Gucy2e                                                   | guanylate cyclase 2e                                                                                                                                                                      |
| 10506213               | 1.53        | Ube2u                                                    | ubiquitin-conjugating enzyme E2U (putative)                                                                                                                                               |
| 10493309               | 1.53        | Rit1                                                     | Ras-like without CAAX 1                                                                                                                                                                   |
| 10601416               | 1.53        | P2ry10                                                   | purinergic receptor P2Y, G-protein coupled 10                                                                                                                                             |
| 10358982               | 1.53        | Mr1                                                      | major histocompatibility complex, class I-related                                                                                                                                         |
| 10464672               | 1.53        | Ssh3                                                     | slingshot homolog 3 (Drosophila)                                                                                                                                                          |
| 10440141               | 1.53        | Olfr177 Olfr176                                          | olfactory receptor 177   olfactory receptor 176                                                                                                                                           |
| 10386058               | 1.53        | Sparc                                                    | secreted acidic cysteine rich glycoprotein                                                                                                                                                |
| 10344897               | 1.53        | Sulf1                                                    | sulfatase 1                                                                                                                                                                               |
| 10518735               | 1.53        | Spsb1                                                    | splA/ryanodine receptor domain and SOCS box containing 1                                                                                                                                  |
| 10583324               | 1.53        |                                                          |                                                                                                                                                                                           |
| 10446928               | 1.53        | Ltbp1                                                    | latent transforming growth factor beta binding protein 1                                                                                                                                  |
| 10545401               | 1.53        | Vamp5                                                    | vesicle-associated membrane protein 5                                                                                                                                                     |
| 10371607               | 1.53        | Dram1                                                    | DNA-damage regulated autophagy modulator 1                                                                                                                                                |
| 10365716               | 1.53        | Ikbip                                                    | IKBKB interacting protein                                                                                                                                                                 |
| 10381096               | 1.53        | Igfbp4                                                   | insulin-like growth factor binding protein 4                                                                                                                                              |
| 10353438               | 1.53        | Tram2                                                    | translocating chain-associating membrane protein 2                                                                                                                                        |
| 10450145               | 1.53        | Psmb9                                                    | proteasome (prosome, macropain) subunit, beta type 9 (large multifunctional peptidase 2)                                                                                                  |
| 10528480               | 1.53        | Gm6560                                                   | predicted gene 6560                                                                                                                                                                       |
| 10536505               | 1.53        | Met                                                      | met proto-oncogene                                                                                                                                                                        |
| 10581013               | 1.53        | Cdh11                                                    | cadherin 11                                                                                                                                                                               |
| 10509811               | 1.53        | Tas1r2                                                   | taste receptor, type 1, member 2                                                                                                                                                          |
| 10572897               | 1.53        | Hmox1                                                    | heme oxygenase (decycling) 1                                                                                                                                                              |
| 10437970               | 1.53        | 2310008H04Rik                                            | RIKEN cDNA 2310008H04 gene                                                                                                                                                                |
| 10349157               | 1.53        | Serpinb2                                                 | serine (or cysteine) peptidase inhibitor, clade B, member 2                                                                                                                               |
| 10388430               | 1.53        | Serpinf1                                                 | serine (or cysteine) peptidase inhibitor, clade F, member 1                                                                                                                               |
| 10353750               | 1.53        | Bag2                                                     | BCL2-associated athanogene 2                                                                                                                                                              |
| 10474516               | 1.53        | Olfr1302                                                 | olfactory receptor 1302                                                                                                                                                                   |
| 10368175               | 1.53        | Pde7b                                                    | phosphodiesterase 7B                                                                                                                                                                      |
| 10497358               | 1.52        | Sirpb1b Sirpb1a LO<br>C100038947 LOC6<br>30976 LOC641195 | signal-regulatory protein beta 1B   signal-regulatory protein beta 1A<br>  signal-regulatory protein beta 1-like   similar to SIRP beta 1<br>isoform 3   similar to SIRP beta 1 isoform 1 |
| 10540679               | 1.52        | Il17re                                                   | interleukin 17 receptor E                                                                                                                                                                 |

| Transcripts Cluster Id | Fold change | Gene Symbol                | Gene description                                                                                                              |
|------------------------|-------------|----------------------------|-------------------------------------------------------------------------------------------------------------------------------|
| 10485070               | 1.52        | Mdk                        | midkine                                                                                                                       |
| 10353844               | 1.52        | Neurl3                     | neuralized homolog 3 homolog (Drosophila)                                                                                     |
| 10601565               | 1.52        |                            |                                                                                                                               |
| 10463716               | 1.52        | Cnm2                       | cyclin M2                                                                                                                     |
| 10461878               | 1.52        | Prune2                     | prune homolog 2 (Drosophila)                                                                                                  |
| 10567428               | 1.52        | Dnahc3                     | dynein, axonemal, heavy chain 3                                                                                               |
| 10466147               | 1.52        | 1700025F22Rik              | RIKEN cDNA 1700025F22 gene                                                                                                    |
| 10581327               | 1.52        | E130303B06Rik              | RIKEN cDNA E130303B06 gene                                                                                                    |
| 10495967               | 1.52        | Tifa                       | TRAF-interacting protein with forkhead-associated domain                                                                      |
| 10523231               | 1.52        | Art3                       | ADP-ribosyltransferase 3                                                                                                      |
| 10525833               | 1.52        | Atp6v0a2                   | ATPase, H <sup>+</sup> transporting, lysosomal V0 subunit A2                                                                  |
| 10573483               | 1.52        | Prdx2                      | peroxiredoxin 2                                                                                                               |
| 10604867               | 1.52        | Mir471                     | microRNA 471                                                                                                                  |
| 10358519               | 1.52        | Hmcn1                      | hemicentin 1                                                                                                                  |
| 10515574               | 1.52        | St3gal3                    | ST3 beta-galactoside alpha-2,3-sialyltransferase 3                                                                            |
| 10551155               | 1.52        | Lipe                       | lipase, hormone sensitive                                                                                                     |
| 10478048               | 1.52        | Lbp                        | lipopolysaccharide binding protein                                                                                            |
| 10552570               | 1.52        | Klk1b11                    | kallikrein 1-related peptidase b11                                                                                            |
| 10405464               | 1.52        | Grk6                       | G protein-coupled receptor kinase 6                                                                                           |
| 10352703               | 1.52        | Mfsd7b A230020J2<br>1Rik   | major facilitator superfamily domain containing 7B   RIKEN cDNA A230020J21 gene                                               |
| 10354979               | 1.52        | Als2 Mpp4                  | amyotrophic lateral sclerosis 2 (juvenile) homolog (human)   membrane protein, palmitoylated 4 (MAGUK p55 subfamily member 4) |
| 10397416               | 1.52        | 1700019E19Rik              | RIKEN cDNA 1700019E19 gene                                                                                                    |
| 10490502               | 1.52        | Tcf15                      | transcription factor-like 5 (basic helix-loop-helix)                                                                          |
| 10458303               | 1.52        | Eescr                      | endothelial cell-specific chemotaxis regulator                                                                                |
| 10507110               | 1.52        |                            |                                                                                                                               |
| 10455054               | 1.52        | Pcdhb3                     | protocadherin beta 3                                                                                                          |
| 10560672               | 1.52        | Cblc                       | Casitas B-lineage lymphoma c                                                                                                  |
| 10455112               | 1.52        | Pcdhb17                    | protocadherin beta 17                                                                                                         |
| 10562308               | 1.52        | Abpg                       | androgen binding protein gamma                                                                                                |
| 10455259               | 1.52        | Arhgap26                   | Rho GTPase activating protein 26                                                                                              |
| 10371387               | 1.52        | Ckap4                      | cytoskeleton-associated protein 4                                                                                             |
| 10444298               | 1.52        | H2-Eb1                     | histocompatibility 2, class II antigen E beta                                                                                 |
| 10433494               | 1.52        | Nubp1                      | nucleotide binding protein 1                                                                                                  |
| 10542093               | 1.52        | Nrip2                      | nuclear receptor interacting protein 2                                                                                        |
| 10369842               | 1.52        | Bicc1                      | bicaudal C homolog 1 (Drosophila)                                                                                             |
| 10586306               | 1.51        | Igdcc4                     | immunoglobulin superfamily, DCC subclass, member 4                                                                            |
| 10525677               | 1.51        | Hip1r                      | huntingtin interacting protein 1 related                                                                                      |
| 10352916               | 1.51        | Mir29b-<br>2 A330023F24Rik | microRNA 29b-2   RIKEN cDNA A330023F24 gene                                                                                   |
| 10381588               | 1.51        | Grn                        | granulin                                                                                                                      |
| 10348670               | 1.51        | Rnpepl1                    | arginyl aminopeptidase (aminopeptidase B)-like 1                                                                              |
| 10379044               | 1.51        | Rab34                      | RAB34, member of RAS oncogene family                                                                                          |

| Transcripts Cluster Id | Fold change | Gene Symbol                                                                     | Gene description                                                                                                                                                                                                                       |
|------------------------|-------------|---------------------------------------------------------------------------------|----------------------------------------------------------------------------------------------------------------------------------------------------------------------------------------------------------------------------------------|
| 10510178               | 1.51        | Gm13051 Zfp534 Gm13251 Gm13152 <br>Rex2 Gm13138 Gm13235 Gm13151 Gm13225 Gm13212 | predicted gene 13051   zinc finger protein 534   predicted gene 13251   predicted gene 13152   reduced expression 2   predicted gene 13138   predicted gene 13235   predicted gene 13151   predicted gene 13225   predicted gene 13212 |
| 10486284               | 1.51        | Ndufaf1                                                                         | NADH dehydrogenase (ubiquinone) 1 alpha subcomplex, assembly factor 1                                                                                                                                                                  |
| 10522411               | 1.51        | Cwh43                                                                           | cell wall biogenesis 43 C-terminal homolog (S. cerevisiae)                                                                                                                                                                             |
| 10455199               | 1.51        | Rel2 Fchsd1                                                                     | RELT-like 2   FCH and double SH3 domains 1                                                                                                                                                                                             |
| 10373583               | 1.51        | Gdf11                                                                           | growth differentiation factor 11                                                                                                                                                                                                       |
| 10419448               | 1.51        | Olf732                                                                          | olfactory receptor 732                                                                                                                                                                                                                 |
| 10454807               | 1.51        | Snora74a                                                                        | small nucleolar RNA, H/ACA box 74A                                                                                                                                                                                                     |
| 10397853               | 1.51        | Rin3                                                                            | Ras and Rab interactor 3                                                                                                                                                                                                               |
| 10543067               | 1.51        | Asns                                                                            | asparagine synthetase                                                                                                                                                                                                                  |
| 10473847               | 1.51        | Acp2 Ddb2                                                                       | acid phosphatase 2, lysosomal   damage specific DNA binding protein 2                                                                                                                                                                  |
| 10488636               | 1.51        | Defb26                                                                          | defensin beta 26                                                                                                                                                                                                                       |
| 10431935               | 1.51        | Amigo2 Fam113b                                                                  | adhesion molecule with Ig like domain 2   family with sequence similarity 113, member B                                                                                                                                                |
| 10385932               | 1.51        | Lym7                                                                            | LYR motif containing 7                                                                                                                                                                                                                 |
| 10405918               | 1.51        | Rsl1                                                                            | regulator of sex limited protein 1                                                                                                                                                                                                     |
| 10532346               | 1.51        | P2rx2                                                                           | purinergic receptor P2X, ligand-gated ion channel, 2                                                                                                                                                                                   |
| 10487605               | 1.51        | F830045P16Rik                                                                   | RIKEN cDNA F830045P16 gene                                                                                                                                                                                                             |
| 10390103               | 1.51        | Pdk2                                                                            | pyruvate dehydrogenase kinase, isoenzyme 2                                                                                                                                                                                             |
| 10526153               | 1.51        | Tyw1                                                                            | tRNA-yW synthesizing protein 1 homolog (S. cerevisiae)                                                                                                                                                                                 |
| 10555736               | 1.51        | Olf558                                                                          | olfactory receptor 558                                                                                                                                                                                                                 |
| 10600698               | 1.51        | 5430427O19Rik                                                                   | RIKEN cDNA 5430427O19 gene                                                                                                                                                                                                             |
| 10430510               | 1.51        | Tmem184b                                                                        | transmembrane protein 184b                                                                                                                                                                                                             |
| 10375145               | 1.51        | Lcp2                                                                            | lymphocyte cytosolic protein 2                                                                                                                                                                                                         |
| 10467826               | 1.51        | Hpse2                                                                           | heparanase 2                                                                                                                                                                                                                           |
| 10558345               | 1.51        | Dock1                                                                           | dedicator of cytokinesis 1                                                                                                                                                                                                             |
| 10396476               | 1.51        | Rhoj                                                                            | ras homolog gene family, member J                                                                                                                                                                                                      |
| 10405851               | 1.51        | Gm10775                                                                         | predicted gene 10775                                                                                                                                                                                                                   |
| 10350349               | 1.51        | Dennd1b                                                                         | DENN/MADD domain containing 1B                                                                                                                                                                                                         |
| 10565811               | 1.51        | Snord15b                                                                        | small nucleolar RNA, C/D box 14B                                                                                                                                                                                                       |
| 10392825               | 1.51        | Gm11711 CIm3                                                                    | predicted gene 11711   CMRF-35-like molecule 3                                                                                                                                                                                         |
| 10552090               | 1.51        | Abpe                                                                            | androgen binding protein epsilon                                                                                                                                                                                                       |
| 10492428               | 1.51        | Tiparp 4931440P22Rik                                                            | TCDD-inducible poly(ADP-ribose) polymerase   RIKEN cDNA 4931440P22 gene                                                                                                                                                                |
| 10368845               | 1.51        | 2410017P07Rik                                                                   | RIKEN cDNA 2410017P07 gene                                                                                                                                                                                                             |
| 10444841               | 1.51        | H2-Q10                                                                          | histocompatibility 2, Q region locus 10                                                                                                                                                                                                |
| 10578950               | 1.51        | Gm10664                                                                         | predicted gene 10664                                                                                                                                                                                                                   |
| 10606071               | 1.51        | Ercc6l                                                                          | excision repair cross-complementing rodent repair deficiency complementation group 6 - like                                                                                                                                            |

| Transcripts Cluster Id | Fold change | Gene Symbol                                              | Gene description                                                                                                                                              |
|------------------------|-------------|----------------------------------------------------------|---------------------------------------------------------------------------------------------------------------------------------------------------------------|
| 10596207               | 1.51        | Uba5                                                     | ubiquitin-like modifier activating enzyme 5                                                                                                                   |
| 10409616               | 1.51        | Spock1                                                   | sparc/osteonectin, cwcv and kazal-like domains proteoglycan 1                                                                                                 |
| 10596465               | 1.51        | Acy1                                                     | aminoacylase 1                                                                                                                                                |
| 10449236               | 1.51        | Nme4                                                     | non-metastatic cells 4, protein expressed in                                                                                                                  |
| 10536762               | 1.51        | Snd1                                                     | staphylococcal nuclease and tudor domain containing 1                                                                                                         |
| 10386110               | 1.51        | Hand1                                                    | heart and neural crest derivatives expressed transcript 1                                                                                                     |
| 10506822               | 1.51        | Orc1l                                                    | origin recognition complex, subunit 1-like ( <i>S.cerevisiae</i> )                                                                                            |
| 10508829               | 1.51        | Map3k6                                                   | mitogen-activated protein kinase kinase kinase 6                                                                                                              |
| 10523168               | 1.51        | Epgn                                                     | epithelial mitogen                                                                                                                                            |
| 10388747               | 1.51        | BC017647                                                 |                                                                                                                                                               |
| 10370242               | 1.50        | Pcbp3                                                    | poly(rC) binding protein 3                                                                                                                                    |
| 10428579               | 1.50        | Ext1                                                     | exostoses (multiple) 1                                                                                                                                        |
| 10576532               | 1.50        | Tsnax                                                    | translin-associated factor X                                                                                                                                  |
| 10565241               | 1.50        | 1700026D08Rik                                            | RIKEN cDNA 1700026D08 gene                                                                                                                                    |
| 10540952               | 1.50        | Ift122                                                   | intraflagellar transport 122 homolog ( <i>Chlamydomonas</i> )                                                                                                 |
| 10494781               | 1.50        | Igsf3                                                    | immunoglobulin superfamily, member 3                                                                                                                          |
| 10526838               | 1.50        | Got2                                                     | glutamate oxaloacetate transaminase 2, mitochondrial                                                                                                          |
| 10542949               | 1.50        | Mir653                                                   | microRNA 653                                                                                                                                                  |
| 10377265               | 1.50        | Pik3r5                                                   | phosphoinositide-3-kinase, regulatory subunit 5, p101                                                                                                         |
| 10531518               | 1.50        | A430089I19Rik BC061212 Gm10424 Gm3147 BC080696 LOC665755 | RIKEN cDNA A430089I19 gene   cDNA sequence BC061212   predicted gene 10424   predicted gene 3147   cDNA sequence BC080696   similar to CDNA sequence BC061212 |
| 10370376               | 1.50        | Pfk1                                                     | phosphofructokinase, liver, B-type                                                                                                                            |
| 10574694               | 1.50        | Elmo3                                                    | engulfment and cell motility 3, ced-12 homolog ( <i>C. elegans</i> )                                                                                          |
| 10477032               | 1.50        | 5430405G05Rik                                            | RIKEN cDNA 5430405G05 gene                                                                                                                                    |
| 10446013               | 1.50        | Mpnd                                                     | MPN domain containing                                                                                                                                         |
| 10381260               | 1.50        | Tubg2                                                    | tubulin, gamma 2                                                                                                                                              |
| 10501492               | 1.50        | Hectd1 Gm5548                                            | HECT domain containing 1   predicted pseudogene 5548                                                                                                          |
| 10360563               | 1.50        | Smyd3                                                    | SET and MYND domain containing 3                                                                                                                              |
| 10389522               | -1.50       | Rpl13a                                                   | ribosomal protein L13A                                                                                                                                        |
| 10557033               | -1.50       | Eef2k                                                    | eukaryotic elongation factor-2 kinase                                                                                                                         |
| 10369413               | -1.50       | Sgpl1                                                    | sphingosine phosphate lyase 1                                                                                                                                 |
| 10585984               | -1.50       | Myo9a                                                    | myosin IXa                                                                                                                                                    |
| 10461475               | -1.50       | Cpsf7                                                    | cleavage and polyadenylation specific factor 7                                                                                                                |
| 10410925               | -1.50       |                                                          |                                                                                                                                                               |
| 10554895               | -1.51       | Crebzf                                                   | CREB/ATF bZIP transcription factor                                                                                                                            |
| 10575628               | -1.51       |                                                          |                                                                                                                                                               |
| 10542310               | -1.51       | Cdkn1b                                                   | cyclin-dependent kinase inhibitor 1B                                                                                                                          |
| 10391577               | -1.51       | Hdac5                                                    | histone deacetylase 5                                                                                                                                         |
| 10394158               | -1.51       | Kif3c 1110002L01Rik                                      | kinesin family member 3C   RIKEN cDNA 1110002L01 gene                                                                                                         |
| 10481711               | -1.51       | Stxbp1                                                   | syntaxin binding protein 1                                                                                                                                    |
| 10580953               | -1.51       |                                                          |                                                                                                                                                               |



| Transcripts Cluster Id | Fold change | Gene Symbol                                                 | Gene description                                                                                                                                                                                                                                                                                                                                                                                                                                      |
|------------------------|-------------|-------------------------------------------------------------|-------------------------------------------------------------------------------------------------------------------------------------------------------------------------------------------------------------------------------------------------------------------------------------------------------------------------------------------------------------------------------------------------------------------------------------------------------|
| 10352393               | -1.51       | Srp9                                                        | signal recognition particle 9                                                                                                                                                                                                                                                                                                                                                                                                                         |
| 10547009               | -1.51       | Vgll4                                                       | vestigial like 4 (Drosophila)                                                                                                                                                                                                                                                                                                                                                                                                                         |
| 10355264               | -1.51       | Gm10072                                                     | ribosomal protein L31 pseudogene                                                                                                                                                                                                                                                                                                                                                                                                                      |
| 10499873               | -1.51       | Prr9                                                        | proline rich 9                                                                                                                                                                                                                                                                                                                                                                                                                                        |
| 10573344               | -1.51       | Mir27a                                                      | microRNA 27a                                                                                                                                                                                                                                                                                                                                                                                                                                          |
| 10432840               | -1.51       | Krt2                                                        | keratin 2                                                                                                                                                                                                                                                                                                                                                                                                                                             |
| 10348354               | -1.52       | Ugt1a9 Ugt1a1 Ugt1a5 Ugt1a10 Ugt1a2 Ugt1a6a Ugt1a7c Ugt1a6b | UDP glucuronosyltransferase 1 family, polypeptide A9   UDP glucuronosyltransferase 1 family, polypeptide A1   UDP glucuronosyltransferase 1 family, polypeptide A5   UDP glycosyltransferase 1 family, polypeptide A10   UDP glucuronosyltransferase 1 family, polypeptide A2   UDP glucuronosyltransferase 1 family, polypeptide A6A   UDP glucuronosyltransferase 1 family, polypeptide A7C   UDP glucuronosyltransferase 1 family, polypeptide A6B |
| 10494664               | -1.52       | Wars2                                                       | tryptophanyl tRNA synthetase 2 (mitochondrial)                                                                                                                                                                                                                                                                                                                                                                                                        |
| 10528257               | -1.52       | Rsbn1l                                                      | round spermatid basic protein 1-like                                                                                                                                                                                                                                                                                                                                                                                                                  |
| 10573803               | -1.52       | Cyld                                                        | cylindromatosis (turban tumor syndrome)                                                                                                                                                                                                                                                                                                                                                                                                               |
| 10493516               | -1.52       | Gm15417                                                     | predicted gene 15417                                                                                                                                                                                                                                                                                                                                                                                                                                  |
| 10385709               | -1.52       | C330016O10Rik D930048N14Rik                                 | RIKEN cDNA C330016O10 gene   RIKEN cDNA D930048N14 gene                                                                                                                                                                                                                                                                                                                                                                                               |
| 10418038               | -1.52       | Zfp503                                                      | zinc finger protein 503                                                                                                                                                                                                                                                                                                                                                                                                                               |
| 10563834               | -1.52       |                                                             |                                                                                                                                                                                                                                                                                                                                                                                                                                                       |
| 10419284               | -1.52       | Gm10101                                                     | predicted gene 10101                                                                                                                                                                                                                                                                                                                                                                                                                                  |
| 10432831               | -1.52       | Krt73                                                       | keratin 73                                                                                                                                                                                                                                                                                                                                                                                                                                            |
| 10399189               | -1.52       | Sp8                                                         | trans-acting transcription factor 8                                                                                                                                                                                                                                                                                                                                                                                                                   |
| 10367118               | -1.52       |                                                             |                                                                                                                                                                                                                                                                                                                                                                                                                                                       |
| 10353002               | -1.53       |                                                             |                                                                                                                                                                                                                                                                                                                                                                                                                                                       |
| 10548727               | -1.53       | D230041D01Rik                                               | RIKEN cDNA D230041D01 gene                                                                                                                                                                                                                                                                                                                                                                                                                            |
| 10556640               | -1.53       | 6330503K22Rik                                               | RIKEN cDNA 6330503K22 gene                                                                                                                                                                                                                                                                                                                                                                                                                            |
| 10585625               | -1.53       | Sin3a                                                       | transcriptional regulator, SIN3A (yeast)                                                                                                                                                                                                                                                                                                                                                                                                              |
| 10355227               | -1.53       | 1110028C15Rik Rpe                                           | RIKEN cDNA 1110028C15 gene   ribulose-5-phosphate-3-epimerase                                                                                                                                                                                                                                                                                                                                                                                         |
| 10394833               | -1.53       |                                                             |                                                                                                                                                                                                                                                                                                                                                                                                                                                       |
| 10590563               | -1.53       | Lars2                                                       | leucyl-tRNA synthetase, mitochondrial                                                                                                                                                                                                                                                                                                                                                                                                                 |
| 10535389               | -1.53       | Rnf216                                                      | ring finger protein 216                                                                                                                                                                                                                                                                                                                                                                                                                               |
| 10501690               | -1.54       | Slc35a3                                                     | solute carrier family 35 (UDP-N-acetylglucosamine (UDP-GlcNAc) transporter), member 3                                                                                                                                                                                                                                                                                                                                                                 |
| 10485213               | -1.54       | Cd82                                                        | CD82 antigen                                                                                                                                                                                                                                                                                                                                                                                                                                          |
| 10393125               | -1.54       | Mrpl38                                                      | mitochondrial ribosomal protein L38                                                                                                                                                                                                                                                                                                                                                                                                                   |
| 10471080               | -1.54       | Usp20                                                       | ubiquitin specific peptidase 20                                                                                                                                                                                                                                                                                                                                                                                                                       |
| 10477389               | -1.54       | Bpil3                                                       | bactericidal/permeability-increasing protein-like 3                                                                                                                                                                                                                                                                                                                                                                                                   |
| 10567407               | -1.54       | Thumpd1                                                     | THUMP domain containing 1                                                                                                                                                                                                                                                                                                                                                                                                                             |
| 10407387               | -1.54       | Gm7120                                                      | predicted gene 7120                                                                                                                                                                                                                                                                                                                                                                                                                                   |
| 10601771               | -1.54       | Armex1                                                      | armadillo repeat containing, X-linked 1                                                                                                                                                                                                                                                                                                                                                                                                               |
| 10494007               | -1.54       | Them4                                                       | thioesterase superfamily member 4                                                                                                                                                                                                                                                                                                                                                                                                                     |

| Transcripts Cluster Id | Fold change | Gene Symbol                | Gene description                                                                                                                                 |
|------------------------|-------------|----------------------------|--------------------------------------------------------------------------------------------------------------------------------------------------|
| 10444008               | -1.54       | Zfp414                     | zinc finger protein 414                                                                                                                          |
| 10367059               | -1.54       | BC089597                   |                                                                                                                                                  |
| 10500272               | -1.54       | Gm129                      | predicted gene 129                                                                                                                               |
| 10428328               | -1.54       | Slc25a32                   | solute carrier family 25, member 32                                                                                                              |
| 10400057               | -1.54       | Arl4a                      | ADP-ribosylation factor-like 4A                                                                                                                  |
| 10588226               | -1.54       | Amotl2                     | angiomin-like 2                                                                                                                                  |
| 10492424               | -1.54       | Kcnab1                     | potassium voltage-gated channel, shaker-related subfamily, beta member 1                                                                         |
| 10495935               | -1.54       | 4930422G04Rik              | RIKEN cDNA 4930422G04 gene                                                                                                                       |
| 10376507               | -1.54       | Zkscan17 4933439<br>C10Rik | zinc finger with KRAB and SCAN domains 17   RIKEN cDNA 4933439C10 gene                                                                           |
| 10568997               | -1.54       | Sirt3 Psm13                | sirtuin 3 (silent mating type information regulation 2, homolog) 3 (S. cerevisiae)   proteasome (prosome, macropain) 26S subunit, non-ATPase, 13 |
| 10406017               | -1.54       | Irx4                       | Iroquois related homeobox 4 (Drosophila)                                                                                                         |
| 10583392               | -1.54       |                            |                                                                                                                                                  |
| 10537501               | -1.54       | Tas2r108                   | taste receptor, type 2, member 108                                                                                                               |
| 10475804               | -1.55       | Gpat2                      | glycerol-3-phosphate acyltransferase 2, mitochondrial                                                                                            |
| 10345967               | -1.55       | Bivm                       | basic, immunoglobulin-like variable motif containing                                                                                             |
| 10472240               | -1.55       | Tanc1                      | tetratricopeptide repeat, ankyrin repeat and coiled-coil containing 1                                                                            |
| 10603659               | -1.55       | Med14                      | mediator complex subunit 14                                                                                                                      |
| 10369901               | -1.55       | Rtdr1                      | rhabdoid tumor deletion region gene 1                                                                                                            |
| 10443007               | -1.55       | Neur11B                    | neuralized homolog 1B (Drosophila)                                                                                                               |
| 10448094               | -1.55       | Lnpep                      | leucyl/cystinyl aminopeptidase                                                                                                                   |
| 10401192               | -1.55       | Zfyve26                    | zinc finger, FYVE domain containing 26                                                                                                           |
| 10452295               | -1.55       | Tubb4                      | tubulin, beta 4                                                                                                                                  |
| 10357870               | -1.55       | Pre1p                      | proline arginine-rich end leucine-rich repeat                                                                                                    |
| 10440534               | -1.55       | Adamt5                     | a disintegrin-like and metallopeptidase (reprolysin type) with thrombospondin type 1 motif, 5 (aggrecanase-2)                                    |
| 10445187               | -1.55       | Gm6084 Esp4                | predicted gene 6084   exocrine gland-secreting peptide 4                                                                                         |
| 10518132               | -1.56       | Prdm2                      | PR domain containing 2, with ZNF domain                                                                                                          |
| 10412828               | -1.56       |                            |                                                                                                                                                  |
| 10400157               | -1.56       | Nova1                      | neuro-oncological ventral antigen 1                                                                                                              |
| 10574532               | -1.56       | Ces2 BC015286              | carboxylesterase 2   cDNA sequence BC015286                                                                                                      |
| 10366546               | -1.56       | Cpm                        | carboxypeptidase M                                                                                                                               |
| 10434224               | -1.56       |                            |                                                                                                                                                  |
| 10426368               | -1.56       | Lrrk2                      | leucine-rich repeat kinase 2                                                                                                                     |
| 10406817               | -1.56       | Enc1                       | ectodermal-neural cortex 1                                                                                                                       |
| 10575763               | -1.56       | Gan                        | giant axonal neuropathy                                                                                                                          |
| 10532765               | -1.56       |                            |                                                                                                                                                  |
| 10544477               | -1.56       | Nobox                      | NOBOX oogenesis homeobox                                                                                                                         |
| 10600093               | -1.56       | Zfp185                     | zinc finger protein 185                                                                                                                          |
| 10548905               | -1.56       | Eps8                       | epidermal growth factor receptor pathway substrate 8                                                                                             |

| Transcripts Cluster Id | Fold change | Gene Symbol                          | Gene description                                                                                                  |
|------------------------|-------------|--------------------------------------|-------------------------------------------------------------------------------------------------------------------|
| 10426894               | -1.56       | Gm10035 Mettl7a2 <br>Mettl7a1 Higd1c | predicted gene 10035   methyltransferase like 7A2  <br>methyltransferase like 7A1   HIG1 domain family, member 1C |
| 10364413               | -1.56       | Olf1355                              | olfactory receptor 1355                                                                                           |
| 10477557               | -1.57       | Zfp341                               | zinc finger protein 341                                                                                           |
| 10520048               | -1.57       | Mll5                                 | myeloid/lymphoid or mixed-lineage leukemia 5                                                                      |
| 10427816               | -1.57       | Pdzd2                                | PDZ domain containing 2                                                                                           |
| 10469613               | -1.57       | Thns11                               | threonine synthase-like 1 (bacterial)                                                                             |
| 10466972               | -1.57       | Ranbp6                               | RAN binding protein 6                                                                                             |
| 10446553               | -1.57       | Epb4.113                             | erythrocyte protein band 4.1-like 3                                                                               |
| 10573624               | -1.57       | 4921524J17Rik                        | RIKEN cDNA 4921524J17 gene                                                                                        |
| 10484777               | -1.57       | Olf1216                              | olfactory receptor 1216                                                                                           |
| 10550487               | -1.58       | Mill1                                | MHC I like leukocyte 1                                                                                            |
| 10399314               | -1.58       | Mfsd2b                               | major facilitator superfamily domain containing 2B                                                                |
| 10493910               | -1.58       | Gm4858                               | predicted gene 4858                                                                                               |
| 10493500               | -1.58       | Dcst2                                | DC-STAMP domain containing 2                                                                                      |
| 10484555               | -1.58       | Olf1037                              | olfactory receptor 1037                                                                                           |
| 10458560               | -1.58       | Fgf1                                 | fibroblast growth factor 1                                                                                        |
| 10352554               | -1.58       |                                      |                                                                                                                   |
| 10533462               | -1.58       | Rad9b                                | RAD9 homolog B ( <i>S. cerevisiae</i> )                                                                           |
| 10462554               | -1.58       | Lipk                                 | lipase, family member K                                                                                           |
| 10589846               | -1.58       |                                      |                                                                                                                   |
| 10552294               | -1.58       | 4930433I11Rik                        | RIKEN cDNA 4930433I11 gene                                                                                        |
| 10487154               | -1.58       | Secisbp2l                            | SECIS binding protein 2-like                                                                                      |
| 10398297               | -1.58       | Mir345                               | microRNA 345                                                                                                      |
| 10500570               | -1.58       | Hao2                                 | hydroxyacid oxidase 2                                                                                             |
| 10566709               | -1.58       | Nlrp10                               | NLR family, pyrin domain containing 10                                                                            |
| 10403273               | -1.58       | Asb13                                | ankyrin repeat and SOCS box-containing 13                                                                         |
| 10591978               | -1.59       | Ntm                                  | neurotrimin                                                                                                       |
| 10581664               | -1.59       | Il34                                 | interleukin 34                                                                                                    |
| 10367519               | -1.59       | Olf808                               | olfactory receptor 808                                                                                            |
| 10532301               | -1.59       |                                      |                                                                                                                   |
| 10586011               | -1.59       | Larp6                                | La ribonucleoprotein domain family, member 6                                                                      |
| 10382339               | -1.59       | Gm16487                              | predicted gene 16487                                                                                              |
| 10401181               | -1.59       | Rdh11                                | retinol dehydrogenase 11                                                                                          |
| 10584537               | -1.59       | Olf986                               | olfactory receptor 986                                                                                            |
| 10536472               | -1.59       | Mdfic                                | MyoD family inhibitor domain containing                                                                           |
| 10576460               | -1.59       | Capn9                                | calpain 9                                                                                                         |
| 10475051               | -1.59       | Mga                                  | MAX gene associated                                                                                               |
| 10545742               | -1.59       | Cd207                                | CD207 antigen                                                                                                     |
| 10407876               | -1.59       | 5033411D12Rik                        | RIKEN cDNA 5033411D12 gene                                                                                        |
| 10526427               | -1.59       | Dtx2                                 | deltex 2 homolog ( <i>Drosophila</i> )                                                                            |
| 10495549               | -1.60       | Dbt                                  | dihydrolipoamide branched chain transacylase E2                                                                   |
| 10354649               | -1.60       | Pgap1                                | post-GPI attachment to proteins 1                                                                                 |
| 10385239               | -1.60       | Mat2b                                | methionine adenosyltransferase II, beta                                                                           |

| Transcripts Cluster Id | Fold change | Gene Symbol                                      | Gene description                                                                                                             |
|------------------------|-------------|--------------------------------------------------|------------------------------------------------------------------------------------------------------------------------------|
| 10526754               | -1.60       | Ap4m1 Mcm7                                       | adaptor-related protein complex AP-4, mu 1   minichromosome maintenance deficient 7 ( <i>S. cerevisiae</i> )                 |
| 10570837               | -1.60       | Slc20a2                                          | solute carrier family 20, member 2                                                                                           |
| 10475578               | -1.60       | Ctxn2                                            | cortixin 2                                                                                                                   |
| 10368534               | -1.60       | Ncoa7                                            | nuclear receptor coactivator 7                                                                                               |
| 10362633               | -1.60       | Rev3l                                            | REV3-like, catalytic subunit of DNA polymerase zeta RAD54 like ( <i>S. cerevisiae</i> )                                      |
| 10372844               | -1.60       | Rassf3                                           | Ras association (RalGDS/AF-6) domain family member 3                                                                         |
| 10354389               | -1.60       | Slc39a10                                         | solute carrier family 39 (zinc transporter), member 10                                                                       |
| 10545869               | -1.60       | Cml3                                             | camello-like 3                                                                                                               |
| 10427277               | -1.60       | Hoxc11                                           | homeobox C11                                                                                                                 |
| 10521832               | -1.60       | Pi4k2b                                           | phosphatidylinositol 4-kinase type 2 beta                                                                                    |
| 10519693               | -1.61       | Sema3d                                           | sema domain, immunoglobulin domain (Ig), short basic domain, secreted, (semaphorin) 3D                                       |
| 10360684               | -1.61       | Ephx1                                            | epoxide hydrolase 1, microsomal                                                                                              |
| 10601878               | -1.61       | Tceal1                                           | transcription elongation factor A (SII)-like 1                                                                               |
| 10371446               | -1.61       | Bpil2                                            | bactericidal/permeability-increasing protein-like 2                                                                          |
| 10570379               | -1.61       | Grk1                                             | G protein-coupled receptor kinase 1                                                                                          |
| 10417769               | -1.61       | Gm2897 Gm10406 Gm3512 Gm10021 ENSMUSG00000063277 | predicted gene 2897   predicted gene 10406   predicted gene 3512   predicted gene 10021   predicted gene, ENSMUSG00000063277 |
| 10473450               | -1.62       | Olf998                                           | olfactory receptor 998                                                                                                       |
| 10532310               | -1.62       | 4930522L14Rik 2310001H12Rik                      | RIKEN cDNA 4930522L14 gene   RIKEN cDNA 2310001H12 gene                                                                      |
| 10571647               | -1.62       | 4933411K20Rik                                    | RIKEN cDNA 4933411K20 gene                                                                                                   |
| 10383109               | -1.62       | Card14 Sgsh                                      | caspace recruitment domain family, member 14   N-sulfoglucosamine sulfohydrolase (sulfamidase)                               |
| 10532305               | -1.62       | 4930522L14Rik 2310001H12Rik                      | RIKEN cDNA 4930522L14 gene   RIKEN cDNA 2310001H12 gene                                                                      |
| 10495173               | -1.62       | 4933421E11Rik                                    | RIKEN cDNA 4933421E11 gene                                                                                                   |
| 10405942               | -1.62       | Gm10037                                          | predicted gene 10037                                                                                                         |
| 10598757               | -1.62       | Gpr82                                            | G protein-coupled receptor 82                                                                                                |
| 10443912               | -1.63       | Zfp472                                           | zinc finger protein 472                                                                                                      |
| 10567086               | -1.63       | Cyp2r1                                           | cytochrome P450, family 2, subfamily r, polypeptide 1                                                                        |
| 10498166               | -1.63       |                                                  |                                                                                                                              |
| 10402730               | -1.63       | Ppp1r13b                                         | protein phosphatase 1, regulatory (inhibitor) subunit 13B                                                                    |
| 10399337               | -1.63       | Klhl29                                           | kelch-like 29 ( <i>Drosophila</i> )                                                                                          |
| 10478401               | -1.63       | Ttpal                                            | tocopherol (alpha) transfer protein-like                                                                                     |
| 10485747               | -1.64       | 4930430A15Rik                                    | RIKEN cDNA 4930430A15 gene                                                                                                   |
| 10496192               | -1.64       | Tacr3                                            | tachykinin receptor 3                                                                                                        |
| 10589494               | -1.64       | Cspg5                                            | chondroitin sulfate proteoglycan 5                                                                                           |
| 10474229               | -1.64       | Cd59a Cd59b                                      | CD59a antigen   CD59b antigen                                                                                                |
| 10529815               | -1.64       |                                                  |                                                                                                                              |
| 10474274               | -1.64       | Ccdc73                                           | coiled-coil domain containing 73                                                                                             |

| Transcripts Cluster Id | Fold change | Gene Symbol                                                                   | Gene description                                                                                                                                                                                                                                                                                            |
|------------------------|-------------|-------------------------------------------------------------------------------|-------------------------------------------------------------------------------------------------------------------------------------------------------------------------------------------------------------------------------------------------------------------------------------------------------------|
| 10497971               | -1.64       | Sc11                                                                          | sodium channel and clathrin linker 1                                                                                                                                                                                                                                                                        |
| 10442769               | -1.64       |                                                                               |                                                                                                                                                                                                                                                                                                             |
| 10419578               | -1.64       | Ndr2                                                                          | N-myc downstream regulated gene 2                                                                                                                                                                                                                                                                           |
| 10553537               | -1.64       | Luzp2                                                                         | leucine zipper protein 2                                                                                                                                                                                                                                                                                    |
| 10590182               | -1.64       | Exog                                                                          | endo/exonuclease (5'-3'), endonuclease G-like                                                                                                                                                                                                                                                               |
| 10601404               | -1.65       | Gm5127                                                                        | predicted gene 5127                                                                                                                                                                                                                                                                                         |
| 10580382               | -1.65       | Neto2                                                                         | neuropilin (NRP) and tolloid (TLL)-like 2                                                                                                                                                                                                                                                                   |
| 10574023               | -1.65       | Mt2                                                                           | metallothionein 2                                                                                                                                                                                                                                                                                           |
| 10437443               | -1.65       | 5730403B10Rik H<br>mox2                                                       | RIKEN cDNA 5730403B10 gene   heme oxygenase (decycling) 2                                                                                                                                                                                                                                                   |
| 10593918               | -1.66       | Ppcdc                                                                         | phosphopantothienoylcysteine decarboxylase                                                                                                                                                                                                                                                                  |
| 10492774               | -1.66       | LOC633371                                                                     | similar to dachsous 2 isoform 2                                                                                                                                                                                                                                                                             |
| 10369388               | -1.66       | Unc5b                                                                         | unc-5 homolog B (C. elegans)                                                                                                                                                                                                                                                                                |
| 10607012               | -1.66       | Col4a6                                                                        | collagen, type IV, alpha 6                                                                                                                                                                                                                                                                                  |
| 10534395               | -1.66       | Cldn4                                                                         | claudin 4                                                                                                                                                                                                                                                                                                   |
| 10464601               | -1.66       |                                                                               |                                                                                                                                                                                                                                                                                                             |
| 10464391               | -1.67       | Emx2                                                                          | empty spiracles homolog 2 (Drosophila)                                                                                                                                                                                                                                                                      |
| 10515090               | -1.67       | Cdkn2c                                                                        | cyclin-dependent kinase inhibitor 2C (p18, inhibits CDK4)                                                                                                                                                                                                                                                   |
| 10513774               | -1.67       |                                                                               |                                                                                                                                                                                                                                                                                                             |
| 10602925               | -1.67       | Phka2                                                                         | phosphorylase kinase alpha 2                                                                                                                                                                                                                                                                                |
| 10465379               | -1.67       | Snx15                                                                         | sorting nexin 15                                                                                                                                                                                                                                                                                            |
| 10439542               | -1.67       | Zdhhc23                                                                       | zinc finger, DHHC domain containing 23                                                                                                                                                                                                                                                                      |
| 10513437               | -1.67       | Mup11 Mup2 Mup10 Mup8 Mup13 Mu<br>p7 LOC100189605 <br>LOC100048885 Mu<br>p9   | major urinary protein 11   major urinary protein 2   major urinary protein 10   major urinary protein 1   major urinary protein 8   major urinary protein 13   major urinary protein 7   major urinary protein 17   major urinary protein LOC100048885   major urinary protein 9                            |
| 10604656               | -1.67       | Xlr                                                                           | X-linked lymphocyte-regulated complex                                                                                                                                                                                                                                                                       |
| 10498309               | -1.67       | Pfn2                                                                          | profilin 2                                                                                                                                                                                                                                                                                                  |
| 10396952               | -1.67       | Ttc9                                                                          | tetratricopeptide repeat domain 9                                                                                                                                                                                                                                                                           |
| 10513455               | -1.67       | Mup2 Mup11 Mup10 Mup7 Mup8 Mup13 LOC100189605 <br>LOC100048885 Mu<br>p9 Mup12 | major urinary protein 2   major urinary protein 11   major urinary protein 1   major urinary protein 10   major urinary protein 7   major urinary protein 8   major urinary protein 13   major urinary protein 17   major urinary protein LOC100048885   major urinary protein 9   major urinary protein 12 |
| 10411215               | -1.67       | Crhbp                                                                         | corticotropin releasing hormone binding protein                                                                                                                                                                                                                                                             |
| 10348376               | -1.67       | Heatr7b1                                                                      | HEAT repeat containing 7B1                                                                                                                                                                                                                                                                                  |
| 10447317               | -1.67       | Epas1                                                                         | endothelial PAS domain protein 1                                                                                                                                                                                                                                                                            |
| 10394676               | -1.67       |                                                                               |                                                                                                                                                                                                                                                                                                             |
| 10408767               | -1.68       | Slc35b3                                                                       | solute carrier family 35, member B3                                                                                                                                                                                                                                                                         |
| 10389797               | -1.68       | Stxbp4                                                                        | syntaxin binding protein 4                                                                                                                                                                                                                                                                                  |
| 10564631               | -1.68       | Slco3a1                                                                       | solute carrier organic anion transporter family, member 3a1                                                                                                                                                                                                                                                 |
| 10585972               | -1.68       | Myo9a                                                                         | myosin IXa                                                                                                                                                                                                                                                                                                  |
| 10410341               | -1.68       | Zfp87                                                                         | zinc finger protein 87                                                                                                                                                                                                                                                                                      |

| Transcripts Cluster Id | Fold change | Gene Symbol                                                       | Gene description                                                                                                                                                                                                                                                                 |
|------------------------|-------------|-------------------------------------------------------------------|----------------------------------------------------------------------------------------------------------------------------------------------------------------------------------------------------------------------------------------------------------------------------------|
| 10513428               | -1.68       | Mup2 Mup11 Mup10 Mup7 Mup13 Mu p8 LOC100189605 LOC100048885 Mu p9 | major urinary protein 2   major urinary protein 11   major urinary protein 1   major urinary protein 10   major urinary protein 7   major urinary protein 13   major urinary protein 8   major urinary protein 17   major urinary protein LOC100048885   major urinary protein 9 |
| 10375263               | -1.68       | Gm9972                                                            | predicted gene 9972                                                                                                                                                                                                                                                              |
| 10488256               | -1.69       | Ovol2                                                             | ovo-like 2 (Drosophila)                                                                                                                                                                                                                                                          |
| 10530130               | -1.69       | Rell1                                                             | RELT-like 1                                                                                                                                                                                                                                                                      |
| 10541246               | -1.69       | Il17ra                                                            | interleukin 17 receptor A                                                                                                                                                                                                                                                        |
| 10507218               | -1.69       | Mknk1                                                             | MAP kinase-interacting serine/threonine kinase 1                                                                                                                                                                                                                                 |
| 10504916               | -1.69       |                                                                   |                                                                                                                                                                                                                                                                                  |
| 10377569               | -1.69       | Fxr2                                                              | fragile X mental retardation, autosomal homolog 2                                                                                                                                                                                                                                |
| 10542662               | -1.69       | Abcc9 5330439B14 Rik                                              | ATP-binding cassette, sub-family C (CFTR/MRP), member 9   RIKEN cDNA 5330439B14 gene                                                                                                                                                                                             |
| 10575160               | -1.70       | Nfat5                                                             | nuclear factor of activated T-cells 5                                                                                                                                                                                                                                            |
| 10525030               | -1.70       | Tbx5                                                              | T-box 5                                                                                                                                                                                                                                                                          |
| 10368199               | -1.70       | Myb                                                               | myeloblastosis oncogene                                                                                                                                                                                                                                                          |
| 10461093               | -1.70       | Pla2g16                                                           | phospholipase A2, group XVI                                                                                                                                                                                                                                                      |
| 10458913               | -1.70       | Cep120                                                            | centrosomal protein 120                                                                                                                                                                                                                                                          |
| 10585162               | -1.70       | Gm4894                                                            | predicted gene 4894                                                                                                                                                                                                                                                              |
| 10528476               | -1.70       |                                                                   |                                                                                                                                                                                                                                                                                  |
| 10574511               | -1.70       | BC015286                                                          |                                                                                                                                                                                                                                                                                  |
| 10426891               | -1.71       | Mettl7a1                                                          | methyltransferase like 7A1                                                                                                                                                                                                                                                       |
| 10439766               | -1.71       | Pvrl3                                                             | poliovirus receptor-related 3                                                                                                                                                                                                                                                    |
| 10590073               | -1.71       | Vill                                                              | villin-like                                                                                                                                                                                                                                                                      |
| 10489127               | -1.72       | Rbl1                                                              | retinoblastoma-like 1 (p107)                                                                                                                                                                                                                                                     |
| 10442087               | -1.72       | Ncrna00085                                                        | non-protein coding RNA 85                                                                                                                                                                                                                                                        |
| 10383853               | -1.72       | Hormad2                                                           | HORMA domain containing 2                                                                                                                                                                                                                                                        |
| 10439321               | -1.72       | Slc15a2                                                           | solute carrier family 15 (H+/peptide transporter), member 2                                                                                                                                                                                                                      |
| 10469571               | -1.72       | Otud1                                                             | OTU domain containing 1                                                                                                                                                                                                                                                          |
| 10562731               | -1.73       |                                                                   |                                                                                                                                                                                                                                                                                  |
| 10467102               | -1.73       | Rnls                                                              | renalase, FAD-dependent amine oxidase                                                                                                                                                                                                                                            |
| 10473708               | -1.73       | Agbl2                                                             | ATP/GTP binding protein-like 2                                                                                                                                                                                                                                                   |
| 10390950               | -1.73       | Gm11564                                                           | predicted gene 11564                                                                                                                                                                                                                                                             |
| 10364153               | -1.74       | Pcnt Gm9744                                                       | pericentrin (kendrin)   predicted gene 9744                                                                                                                                                                                                                                      |
| 10516064               | -1.74       | Mfsd2a                                                            | major facilitator superfamily domain containing 2A                                                                                                                                                                                                                               |
| 10600604               | -1.74       | Dmd                                                               | dystrophin, muscular dystrophy                                                                                                                                                                                                                                                   |
| 10588419               | -1.74       | Aste1                                                             | asteroid homolog 1 (Drosophila)                                                                                                                                                                                                                                                  |
| 10529285               | -1.75       | Nkx1-1                                                            | NK1 transcription factor related, locus 1 (Drosophila)                                                                                                                                                                                                                           |
| 10598863               | -1.75       | Rgn                                                               | regucalcin                                                                                                                                                                                                                                                                       |
| 10487238               | -1.75       | Hdc                                                               | histidine decarboxylase                                                                                                                                                                                                                                                          |
| 10505705               | -1.75       | Sh3gl2                                                            | SH3-domain GRB2-like 2                                                                                                                                                                                                                                                           |
| 10372503               | -1.75       | Lgr5                                                              | leucine rich repeat containing G protein coupled receptor 5                                                                                                                                                                                                                      |
| 10462140               | -1.75       | Dock8                                                             | dedicator of cytokinesis 8                                                                                                                                                                                                                                                       |
| 10472235               | -1.75       | Dapl1                                                             | death associated protein-like 1                                                                                                                                                                                                                                                  |

| Transcripts Cluster Id | Fold change | Gene Symbol                                                                          | Gene description                                                                                                                                                                                                                                                                 |
|------------------------|-------------|--------------------------------------------------------------------------------------|----------------------------------------------------------------------------------------------------------------------------------------------------------------------------------------------------------------------------------------------------------------------------------|
| 10410743               | -1.76       | Ankrd32                                                                              | ankyrin repeat domain 32                                                                                                                                                                                                                                                         |
| 10384423               | -1.76       | Cobl                                                                                 | cordon-bleu                                                                                                                                                                                                                                                                      |
| 10360920               | -1.76       | Tgfb2                                                                                | transforming growth factor, beta 2                                                                                                                                                                                                                                               |
| 10595165               | -1.76       |                                                                                      |                                                                                                                                                                                                                                                                                  |
| 10579776               | -1.76       | Arhgap10                                                                             | Rho GTPase activating protein 10                                                                                                                                                                                                                                                 |
| 10410321               | -1.77       | Zfp874                                                                               | zinc finger protein 874                                                                                                                                                                                                                                                          |
| 10440694               | -1.77       | Krtap8-2                                                                             | keratin associated protein 8-2                                                                                                                                                                                                                                                   |
| 10355225               | -1.78       | Gm10558                                                                              | predicted gene 10558                                                                                                                                                                                                                                                             |
| 10495416               | -1.78       | Vav3                                                                                 | vav 3 oncogene                                                                                                                                                                                                                                                                   |
| 10497958               | -1.78       | 1700034I23Rik                                                                        | RIKEN cDNA 1700034I23 gene                                                                                                                                                                                                                                                       |
| 10548681               | -1.78       |                                                                                      |                                                                                                                                                                                                                                                                                  |
| 10466800               | -1.78       | Pgm5 E030010A14<br>Rik                                                               | phosphoglucomutase 5   RIKEN cDNA E030010A14 gene                                                                                                                                                                                                                                |
| 10592705               | -1.78       | Pou2f3                                                                               | POU domain, class 2, transcription factor 3                                                                                                                                                                                                                                      |
| 10457836               | -1.79       | Nol4                                                                                 | nucleolar protein 4                                                                                                                                                                                                                                                              |
| 10574584               | -1.79       |                                                                                      |                                                                                                                                                                                                                                                                                  |
| 10427606               | -1.79       | Skp2                                                                                 | S-phase kinase-associated protein 2 (p45)                                                                                                                                                                                                                                        |
| 10357660               | -1.79       | Mfsd4                                                                                | major facilitator superfamily domain containing 4                                                                                                                                                                                                                                |
| 10513420               | -1.80       | Mup7 Mup1 Mup10<br> Mup2 Mup8 Mup1<br>3 LOC100189605 L<br>OC100048885 Mup<br>9 Mup12 | major urinary protein 7   major urinary protein 1   major urinary protein 10   major urinary protein 2   major urinary protein 8   major urinary protein 13   major urinary protein 17   major urinary protein LOC100048885   major urinary protein 9   major urinary protein 12 |
| 10416004               | -1.80       | Zfp395                                                                               | zinc finger protein 395                                                                                                                                                                                                                                                          |
| 10423745               | -1.81       | Spag1                                                                                | sperm associated antigen 1                                                                                                                                                                                                                                                       |
| 10524234               | -1.81       | Galnt9                                                                               | UDP-N-acetyl-alpha-D-galactosamine:polypeptide N-acetylgalactosaminyltransferase 9                                                                                                                                                                                               |
| 10485261               | -1.81       | Accsl                                                                                | 1-aminocyclopropane-1-carboxylate synthase homolog (Arabidopsis)(non-functional)-like                                                                                                                                                                                            |
| 10443926               | -1.82       | Zfp563                                                                               | zinc finger protein 563                                                                                                                                                                                                                                                          |
| 10422022               | -1.82       | Gm10843                                                                              | predicted gene 10843                                                                                                                                                                                                                                                             |
| 10494388               | -1.82       | Hist2h2be                                                                            | histone cluster 2, H2be                                                                                                                                                                                                                                                          |
| 10456754               | -1.82       | Gm10532                                                                              | predicted gene 10532                                                                                                                                                                                                                                                             |
| 10581917               | -1.83       | Tmem231                                                                              | transmembrane protein 231                                                                                                                                                                                                                                                        |
| 10367041               | -1.83       | Rdh9                                                                                 | retinol dehydrogenase 9                                                                                                                                                                                                                                                          |
| 10379524               | -1.84       | Ccl11                                                                                | chemokine (C-C motif) ligand 11                                                                                                                                                                                                                                                  |
| 10345016               | -1.85       | Tcfap2b                                                                              | transcription factor AP-2 beta                                                                                                                                                                                                                                                   |
| 10528567               | -1.85       | Atg9b                                                                                | ATG9 autophagy related 9 homolog B (S. cerevisiae)                                                                                                                                                                                                                               |
| 10411226               | -1.85       | F2r11                                                                                | coagulation factor II (thrombin) receptor-like 1                                                                                                                                                                                                                                 |
| 10441093               | -1.86       | Erg                                                                                  | avian erythroblastosis virus E-26 (v-ets) oncogene related                                                                                                                                                                                                                       |
| 10461051               | -1.86       | 5730409K12Rik                                                                        | RIKEN cDNA 5730409K12 gene                                                                                                                                                                                                                                                       |
| 10557399               | -1.86       | Sbk1                                                                                 | SH3-binding kinase 1                                                                                                                                                                                                                                                             |
| 10391043               | -1.87       | Krt9                                                                                 | keratin 9                                                                                                                                                                                                                                                                        |
| 10598032               | -1.87       |                                                                                      |                                                                                                                                                                                                                                                                                  |
| 10588642               | -1.87       | Npr12                                                                                | nitrogen permease regulator-like 2 (S. cerevisiae)                                                                                                                                                                                                                               |

| Transcripts<br>Cluster Id | Fold<br>change | Gene Symbol       | Gene description                                                                |
|---------------------------|----------------|-------------------|---------------------------------------------------------------------------------|
| 10494114                  | -1.87          | Selenbp1 Selenbp2 | selenium binding protein 1   selenium binding protein 2                         |
| 10403283                  | -1.87          | Calm5             | calmodulin 5                                                                    |
| 10597854                  | -1.88          | Ccdc13            | coiled-coil domain containing 13                                                |
| 10438592                  | -1.89          | Liph              | lipase, member H                                                                |
| 10560618                  | -1.89          | Apoc1             | apolipoprotein C-I                                                              |
| 10512067                  | -1.89          | Ddx58             | DEAD (Asp-Glu-Ala-Asp) box polypeptide 58                                       |
| 10450874                  | -1.90          | Olf101            | olfactory receptor 101                                                          |
| 10568792                  | -1.92          | Stk32c            | serine/threonine kinase 32C                                                     |
| 10480414                  | -1.92          | Enkur             | enkurin, TRPC channel interacting protein                                       |
| 10422822                  | -1.94          | Lifr              | leukemia inhibitory factor receptor                                             |
| 10379736                  | -1.94          | 1100001G20Rik     | RIKEN cDNA 1100001G20 gene                                                      |
| 10515201                  | -1.95          | Cyp4b1            | cytochrome P450, family 4, subfamily b, polypeptide 1                           |
| 10347186                  | -1.96          |                   |                                                                                 |
| 10565840                  | -1.96          | Neu3              | neuraminidase 3                                                                 |
| 10554712                  | -1.96          | 2610206C17Rik     | RIKEN cDNA 2610206C17 gene                                                      |
| 10574560                  | -1.96          | 2310038E17Rik     | RIKEN cDNA 2310038E17 gene                                                      |
| 10439742                  | -1.96          |                   |                                                                                 |
| 10447921                  | -1.98          |                   |                                                                                 |
| 10583432                  | -1.98          |                   |                                                                                 |
| 10505568                  | -1.99          | Frmd3             | FERM domain containing 3                                                        |
| 10371201                  | -2.01          | Ncln              | nicalin homolog (zebrafish)                                                     |
| 10450957                  | -2.02          | Cenpq             | centromere protein Q                                                            |
| 10606235                  | -2.02          | Zdhhc15           | zinc finger, DHHC domain containing 15                                          |
| 10553004                  | -2.04          | Hsd17b14          | hydroxysteroid (17-beta) dehydrogenase 14                                       |
| 10408693                  | -2.05          | F13a1             | coagulation factor XIII, A1 subunit                                             |
| 10507798                  | -2.06          | Mycl1             | v-myc myelocytomatosis viral oncogene homolog 1, lung carcinoma derived (avian) |
| 10448247                  | -2.06          | Zfp40             | zinc finger protein 40                                                          |
| 10474381                  | -2.07          | Kif18a            | kinesin family member 18A                                                       |
| 10357954                  | -2.07          | Ppp1r12b          | protein phosphatase 1, regulatory (inhibitor) subunit 12B                       |
| 10542129                  | -2.08          | Clec2g            | C-type lectin domain family 2, member g                                         |
| 10389786                  | -2.08          | Hlf               | hepatic leukemia factor                                                         |
| 10406538                  | -2.11          |                   |                                                                                 |
| 10346116                  | -2.14          |                   |                                                                                 |
| 10441339                  | -2.14          | A630089N07Rik     | RIKEN cDNA A630089N07 gene                                                      |
| 10483046                  | -2.15          | Dpp4              | dipeptidylpeptidase 4                                                           |
| 10477815                  | -2.15          | Phf20             | PHD finger protein 20                                                           |
| 10467206                  | -2.16          | Ppp1r3c           | protein phosphatase 1, regulatory (inhibitor) subunit 3C                        |
| 10402347                  | -2.18          | Ifi2712a          | interferon, alpha-inducible protein 27 like 2A                                  |
| 10569344                  | -2.19          | Igf2              | insulin-like growth factor 2                                                    |
| 10549842                  | -2.20          | Zfp667            | zinc finger protein 667                                                         |
| 10349147                  | -2.21          | Serpinb7          | serine (or cysteine) peptidase inhibitor, clade B, member 7                     |
| 10549534                  | -2.24          |                   |                                                                                 |
| 10544932                  | -2.25          | Inmt              | indolethylamine N-methyltransferase                                             |
| 10605938                  | -2.25          | P2ry4             | pyrimidinergic receptor P2Y, G-protein coupled, 4                               |



| Transcripts<br>Cluster Id | Fold<br>change | Gene Symbol                                     | Gene description                                                                                                                                    |
|---------------------------|----------------|-------------------------------------------------|-----------------------------------------------------------------------------------------------------------------------------------------------------|
| 10535017                  | -2.26          | Gal3st4                                         | galactose-3-O-sulfotransferase 4                                                                                                                    |
| 10438738                  | -2.27          | Bcl6                                            | B-cell leukemia/lymphoma 6                                                                                                                          |
| 10430818                  | -2.27          | Tnfrsf13c                                       | tumor necrosis factor receptor superfamily, member 13c                                                                                              |
| 10455721                  | -2.28          | Snaip                                           | synuclein, alpha interacting protein (synphilin)                                                                                                    |
| 10493803                  | -2.35          | S100a3                                          | S100 calcium binding protein A3                                                                                                                     |
| 10401684                  | -2.36          | Angel1                                          | angel homolog 1 (Drosophila)                                                                                                                        |
| 10386652                  | -2.36          | Aldh3a2                                         | aldehyde dehydrogenase family 3, subfamily A2                                                                                                       |
| 10606600                  | -2.38          | Pcdh19                                          | protocadherin 19                                                                                                                                    |
| 10511363                  | -2.39          | Penk                                            | preproenkephalin                                                                                                                                    |
| 10559931                  | -2.41          | Vmn2r43 Vmn2r33 <br>Vmn2r35 Vmn2r50 <br>Vmn2r39 | vomeronasal 2, receptor 43   vomeronasal 2, receptor33  <br>vomeronasal 2, receptor 35   vomeronasal 2, receptor 50  <br>vomeronasal 2, receptor 39 |
| 10507804                  | -2.42          | Trit1                                           | tRNA isopentenyltransferase 1                                                                                                                       |
| 10479752                  | -2.42          | Olah                                            | oleoyl-ACP hydrolase                                                                                                                                |
| 10355310                  | -2.43          | Gm8840                                          | predicted gene 8840                                                                                                                                 |
| 10377790                  | -2.44          | Slc16a11                                        | solute carrier family 16 (monocarboxylic acid transporters), member 11                                                                              |
| 10419073                  | -2.45          | Tspan14                                         | tetraspanin 14                                                                                                                                      |
| 10420596                  | -2.46          | Tnfrsf19                                        | tumor necrosis factor receptor superfamily, member 19                                                                                               |
| 10515134                  | -2.53          | Skint9                                          | selection and upkeep of intraepithelial T cells 9                                                                                                   |
| 10497501                  | -2.57          | Naaladl2                                        | N-acetylated alpha-linked acidic dipeptidase-like 2                                                                                                 |
| 10469138                  | -2.59          | 4930412O13Rik                                   | RIKEN cDNA 4930412O13 gene                                                                                                                          |
| 10496438                  | -2.66          | Adh1                                            | alcohol dehydrogenase 1 (class I)                                                                                                                   |
| 10569038                  | -2.68          | Ano9                                            | anoctamin 9                                                                                                                                         |
| 10495675                  | -2.70          | F3                                              | coagulation factor III                                                                                                                              |
| 10524955                  | -2.75          | Tesc                                            | tescalcin                                                                                                                                           |
| 10497490                  | -2.88          | Naaladl2                                        | N-acetylated alpha-linked acidic dipeptidase-like 2                                                                                                 |
| 10494085                  | -2.92          | Selenbp2                                        | selenium binding protein 2                                                                                                                          |
| 10381738                  | -2.93          | Wnt3                                            | wingless-related MMTV integration site 3                                                                                                            |
| 10574617                  | -3.09          | Ces8                                            | carboxylesterase 8 (putative)                                                                                                                       |
| 10390923                  | -3.30          | Krtap4-2                                        | keratin associated protein 4-2                                                                                                                      |
| 10409276                  | -3.45          |                                                 |                                                                                                                                                     |
| 10575702                  | -3.87          | Clec3a                                          | C-type lectin domain family 3, member a                                                                                                             |
| 10569335                  | -4.20          | H19                                             |                                                                                                                                                     |
| 10465424                  | -4.37          | Nrxn2 Gm14964                                   | neurexin II   predicted gene 14964                                                                                                                  |
| 10606178                  | -4.46          | Xist                                            | inactive X specific transcripts                                                                                                                     |
| 10492628                  | -4.58          | Serpini1                                        | serine (or cysteine) peptidase inhibitor, clade I, member 1                                                                                         |
| 10436768                  | -4.92          | Gm10061                                         | predicted gene 10061                                                                                                                                |
| 10440651                  | -4.93          | Krtap24-1                                       | keratin associated protein 24-1                                                                                                                     |
| 10436773                  | -6.33          | Gm7735 Gm9789                                   | predicted gene 7735   predicted gene 9789                                                                                                           |
| 10436766                  | -7.10          | Krtap20-<br>2 Gm6358 1110057<br>P08Rik          | keratin associated protein 20-2   predicted gene 6358   RIKEN<br>cDNA 1110057P08 gene                                                               |
